# Supplementary material for: Adductor Strengthening Programme is successfully adopted but frequently modified in Norwegian male professional football teams: a cross-sectional study
Source: PubMed Central journal article supplement — BMJ Open. 2022 Sep 7;12(9):e060611. doi: 10.1136/bmjopen-2021-060611 (PMC9454074; doi:10.1136/bmjopen-2021-060611), 2022-09-07
Supplement: bmjopen-2021-060611.draft_revisions.pdf [file bmjopen-2021-060611.draft_revisions.pdf]

# BMJ Open

BMJ Open is committed to open peer review. As part of this commitment we make the peer review history of every article we publish publicly available.

When an article is published we post the peer reviewers' comments and the authors' responses online. We also post the versions of the paper that were used during peer review. These are the versions that the peer review comments apply to.

The versions of the paper that follow are the versions that were submitted during the peer review process. They are not the versions of record or the final published versions. They should not be cited or distributed as the published version of this manuscript.

BMJ Open is an open access journal and the full, final, typeset and author-corrected version of record of the manuscript is available on our site with no access controls, subscription charges or pay-per-view fees (<http://bmjopen.bmj.com>).

If you have any questions on BMJ Open's open peer review process please email [info.bmjopen@bmj.com](mailto:info.bmjopen@bmj.com)

# BMJ Open

## **Attitudes, beliefs, and behaviour to the Adductor Strengthening Programme in Norwegian male professional football teams: Successfully adopted, but frequently modified**

|                               |                                                                                                                                                                                                                                                                                                                                                                                                     |
|-------------------------------|-----------------------------------------------------------------------------------------------------------------------------------------------------------------------------------------------------------------------------------------------------------------------------------------------------------------------------------------------------------------------------------------------------|
| Journal:                      | <i>BMJ Open</i>                                                                                                                                                                                                                                                                                                                                                                                     |
| Manuscript ID                 | bmjopen-2021-060611                                                                                                                                                                                                                                                                                                                                                                                 |
| Article Type:                 | Original research                                                                                                                                                                                                                                                                                                                                                                                   |
| Date Submitted by the Author: | 07-Jan-2022                                                                                                                                                                                                                                                                                                                                                                                         |
| Complete List of Authors:     | Stensø, Joakim; Norwegian School of Sports Sciences, Department of Sports Medicine<br>Andersen, Thor Einar; Oslo Sports Trauma Research Center, Norwegian School of Sports Sciences, Department of Sports Medicine; Norwegian FA Medical Clinic<br>Harøy, Joar; Oslo Sports Trauma Research Center, Norwegian School of Sports Sciences, Department of Sports Medicine; Norwegian FA Medical Clinic |
| Keywords:                     | SPORTS MEDICINE, PREVENTIVE MEDICINE, REHABILITATION MEDICINE                                                                                                                                                                                                                                                                                                                                       |
|                               |                                                                                                                                                                                                                                                                                                                                                                                                     |

SCHOLARONE™  
Manuscripts

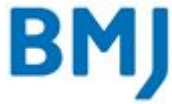

I, the Submitting Author has the right to grant and does grant on behalf of all authors of the Work (as defined in the below author licence), an exclusive licence and/or a non-exclusive licence for contributions from authors who are: i) UK Crown employees; ii) where BMJ has agreed a CC-BY licence shall apply, and/or iii) in accordance with the terms applicable for US Federal Government officers or employees acting as part of their official duties; on a worldwide, perpetual, irrevocable, royalty-free basis to BMJ Publishing Group Ltd ("BMJ") its licensees and where the relevant Journal is co-owned by BMJ to the co-owners of the Journal, to publish the Work in this journal and any other BMJ products and to exploit all rights, as set out in our [licence](#).

The Submitting Author accepts and understands that any supply made under these terms is made by BMJ to the Submitting Author unless you are acting as an employee on behalf of your employer or a postgraduate student of an affiliated institution which is paying any applicable article publishing charge ("APC") for Open Access articles. Where the Submitting Author wishes to make the Work available on an Open Access basis (and intends to pay the relevant APC), the terms of reuse of such Open Access shall be governed by a Creative Commons licence – details of these licences and which [Creative Commons](#) licence will apply to this Work are set out in our licence referred to above.

Other than as permitted in any relevant BMJ Author's Self Archiving Policies, I confirm this Work has not been accepted for publication elsewhere, is not being considered for publication elsewhere and does not duplicate material already published. I confirm all authors consent to publication of this Work and authorise the granting of this licence.

1  
2  
3 **Attitudes, beliefs, and behaviour to the Adductor Strengthening**  
4 **Programme in Norwegian male professional football teams:**  
5 **Successfully adopted, but frequently modified**  
6  
7  
8  
9  
10  
11  
12  
13  
14

15 Joakim Stensø<sup>1</sup>, Thor Einar Andersen<sup>1,2</sup>, Joar Harøy<sup>1,2</sup>  
16  
17

18  
19 1 Oslo Sports Trauma Research Center, Department of Sports Medicine, Norwegian School  
20 of Sports Sciences, Oslo, Norway  
21

22 2 The Norwegian FA Medical Clinic, Oslo, Norway  
23  
24

25 Corresponding author: Joakim Stensø  
26

27 Postal address: Sørlogata 10 C, 0577 Oslo, Norway  
28

29 Email: [joakim.s.stenso@hotmail.no](mailto:joakim.s.stenso@hotmail.no)  
30  
31

32 Word count: 2973  
33  
34  
35  
36  
37  
38  
39  
40  
41  
42  
43  
44  
45  
46  
47  
48  
49  
50  
51  
52  
53  
54  
55  
56  
57  
58  
59  
60

## ABSTRACT

**Objectives:** Groin injuries represent a substantial problem in male football, with the Adductor Strengthening Programme (ASP) being the only exercise programme demonstrated to significantly reduce the risk of groin problems. We aimed first, to use the RE-AIM framework to investigate attitudes, beliefs, and behaviour to the ASP among injury prevention delivery agents (i.e., staff with main responsibility for implementing and conducting injury prevention exercises). Secondly, we aimed to identify a real-world application of the ASP protocol used in a professional team setting.

**Methods:** A descriptive cross-sectional survey of 32 injury prevention delivery agents in Norwegian male professional football teams.

**Results:** Twenty-nine (91%) participants responded. All (100%) respondents were aware of the ASP and its potential to mitigate the burden of groin problems. The two most stated reasons for using the ASP were its injury preventive effect and that it doesn't require equipment. The ASP was adopted by all (100%) delivery agents, but only 10% used it in accordance with the original protocol. The main modifications were that the players in 72% of the teams were instructed to perform a non-progressive number of repetitions during pre-season, and in 86% of the teams instructed to perform more sets, but fewer repetitions per set, during in-season. In total, 97% of the delivery agents planned to continue using the ASP.

**Conclusion:** The delivery agents have positive attitudes and beliefs to the ASP, but they frequently modify it. Also, we identified a real-world application of the ASP protocol.

**Key words:** Football, groin injury, injury prevention, Adductor Strengthening Programme, Copenhagen Adduction, RE-AIM, implementation

## Strengths and limitations of this study

- The questionnaire was pilot tested by delivery agents with relevant experience.
- Thorough data collection process leading to a high response rate.
- The internal validity of the questionnaire was not systematically explored.
- Some of the questionnaire's questions are prone to recall bias as the survey was conducted towards the end of the competitive season.

For peer review only

**What is already known?**

- The Adductor Strengthening Programme prevents groin problems in football, and is suggested implemented in football training
- Many injury prevention programmes and exercises are not successfully implemented in a real-world setting, limiting their effectiveness
- Knowledge of attitudes, beliefs, and behaviour regarding injury prevention exercises is key for successful implementation

**What are the new findings?**

- Team staff responsible for injury prevention exercises in Norwegian male professional football teams are aware of and familiar with the Adductor Strengthening Programme and it's preventative effect
- The programme is widely adopted by all teams.
- We have identified a real-world application of the programme used in a professional team setting

## INTRODUCTION

Groin problems represent a substantial problem in football. They accounting for 4-19% and 2-11% of all time-loss injuries in male and female football, respectively.<sup>1</sup> Moreover, the average weekly proportion of male players with any groin problem causing pain and/or reduced performance is 21% in a full competitive season<sup>2</sup> and, 29% in periods with match congestion.<sup>3</sup>

In a controlled clinical trial, the Adductor Strengthening Programme (ASP) demonstrated a significant 41% reduction in risk of groin problems in male players performing the ASP during one full season.<sup>2</sup> Consequently, dissemination and widespread implementation of the programme in football is recommended.<sup>2,4</sup> The ASP is based on the Copenhagen Adduction exercise,<sup>4</sup> structured with three progression levels and a protocol with a pre-season and in-season exercise prescription. In the clinical trial, players completed on average about 70% of the exercise prescription, demonstrating a considerably higher compliance than previous groin injury prevention programmes.<sup>5,6</sup> The high compliance is an important strength of the ASP, as only successfully implemented injury prevention programmes (i.e. widely adopted, complied with and maintained over time) will reach effectiveness outside controlled clinical trials.<sup>7</sup>

Knowledge of attitudes, beliefs, and behaviour regarding injury prevention exercises is important for successful implementation.<sup>7,10</sup> For this purpose, it is suggested to integrate the Reach Efficacy Adoption Implementation Maintenance (RE-AIM) framework.<sup>8,9</sup> The framework is a procedure where five key implementation dimensions are evaluated, ideally across all levels of the sport setting hierarchy from players and team staff in one end, to national and international sporting organisations at the other end.<sup>9</sup>

Attitudes and beliefs to the ASP is previously investigated in players participating in the ASP clinical trial, revealing that only 31% of the players anticipated continuing using it in line with the original protocol.<sup>10</sup> Also, a recent study on the Copenhagen Adduction exercise among coaches in international male professional teams reported that 72% were aware of the exercise, while 94% of those had adopted it.<sup>11</sup> These findings aligns with previous research emphasising that evidence-based injury prevention exercises can be challenging to apply in the real-world settings.<sup>12</sup> To enhance knowledge, we believed it was important to conduct a survey among team staff, specifically among those being main responsible for implementing and conducting injury prevention exercises (hereafter referred to as “delivery agents”).



1  
2  
3 Therefore, the primary aim of this study was to use the RE-AIM framework to investigate  
4 attitudes, beliefs, and behaviour to the ASP among delivery agents of injury prevention  
5 exercises in Norwegian male professional football teams. The secondary aim was to identify a  
6 real-world application of the ASP protocol used in a professional team setting.  
7  
8  
9

## 10 11 12 13 **METHODS**

### 14 15 16 **Study design and participants**

17  
18  
19 This was a cross-sectional study conducted in September and October 2020. Participants were  
20 the primary delivery agent in each team in the top two divisions of Norwegian male  
21 professional football (n=32): Eliteserien (n=16) and OBOS-ligaen (n=16). The study is  
22 described according to the STROBE statement checklist for cross-sectional studies.<sup>13</sup>  
23  
24  
25

### 26 27 28 **Survey**

29  
30 A new questionnaire based on the RE-AIM<sup>8</sup> framework was developed. The final version  
31 consisted of 38 questions, primarily closed-ended. The questionnaire was developed and  
32 delivered in Norwegian, however, a translated English version is provided as an appendix to  
33 this paper (Supplementary file 1).  
34  
35  
36  
37  
38  
39

### 40 41 **Data collection**

42 All delivery agents received an email with detailed information about the study and a link  
43 with access to an online survey software (SurveyXact, Rambøll Management Consulting AS,  
44 Oslo). We distributed the questionnaire during an international break in September 2020.  
45 Weekly reminders were sent to non-responders by email for four weeks, and after five weeks,  
46 non-responders were contacted by telephone.  
47  
48  
49  
50  
51  
52

### 53 54 **Analysis**

55 We performed statistical analysis using SPSS statistical software (SPSS V24, IBM  
56 Corporation, Armonk, NY). Data consisted of categorical nominal variables, presented as  
57  
58  
59  
60

proportions. Open-ended text responses were analysed using a qualitative content analysis.<sup>14</sup> One non-completed response was excluded from the analysis.

## Patient and public involvement

Three experienced delivery agents (two physiotherapists and one football coach) not involved as participants did pilot test the questionnaire and gave feedback on its understanding and readability. Patients and/or the public were not involved in any other part of the conduct, or reporting, or dissemination plans of this research.

## RESULTS

### Participant characteristics

Twenty-nine (91%) of the 32 delivery agents participated in the survey (14 from Eliteserien and 15 from OBOS-ligaen). The three non-respondents did not report any specific reasons for not participating. Twenty-three (79%) of the respondents were physiotherapists, five (17%) were strength and conditioning coaches and one (3%) was a naprapath. Respondents' experience as delivery agents in football is shown in Table 1.

**Table 1:** Years of experience as delivery agents of injury prevention exercises in football

| Years of experience as delivery agent | n (%)   |
|---------------------------------------|---------|
| 0-4 years                             | 5 (17)  |
| 5-9 years                             | 13 (45) |
| 10-14 years                           | 7 (24)  |
| 15-19 years                           | 3 (10)  |
| ≥ 20 years                            | 1 (3)   |

### Risk and importance of mitigation of groin problems

Football players risk of sustaining a groin problem was assumed to be high or moderate by 19 (66%) and 9 (31%) delivery agents, respectively, while one respondent considered the risk to be low. All (100%) respondents thought prevention exercises to mitigate groin problems was important, replied by 27 (93%) as highly important and by 2 (7%) as moderately important.

## Adductor Strengthening Programme awareness and beliefs about its effect

All (100%) respondents were prior to the study aware of either one or both of ASP and the Copenhagen Adduction exercise. All (100%) delivery agents thought the ASP has potential to successfully mitigate the burden of groin problems, with 11 (38%) perceiving the groin problem mitigation as large and 18 (62%) perceiving it as moderate. Beliefs about the ASP's effect on player availability can be viewed in Figure 1.

[INSERT FIGURE 1 WITH LEGEND HERE]

## Implementation of the Adductor Strengthening Programme

All (100%) delivery agents had adopted the ASP in their team the current season, of which three (10%) replied that their usage was in accordance with the original ASP protocol. Most delivery agents modified the program both during pre-season and in-season. The players were instructed to perform a wide range of different training frequencies, sets per side in each session and repetitions per set (Table 2 and 3). Twenty-eight (97%) delivery agents planned to continue using the ASP in the subsequent season, of which 20 (71%) planned to continue using a modified protocol.

**Table 2:** Overview of reported training volume of the Adductor Strengthening Programme during pre-season\*

| <b>“How often were the players instructed to perform the ASP?”</b>            | <b>n (%)</b> |
|-------------------------------------------------------------------------------|--------------|
| More than 3 times a week                                                      | 2 (7)        |
| 3 times a week                                                                | 4 (14)       |
| Twice a week                                                                  | 16 (55)      |
| Once a week                                                                   | 5 (17)       |
| We carried out the program, but less than once a week                         | 2 (7)        |
| <b>“How many sets were the players instructed to perform per side?”</b>       | <b>n (%)</b> |
| More than 2 sets per side                                                     | 8 (28)       |
| 2 sets per side                                                               | 17 (59)      |
| 1 set per side                                                                | 4 (14)       |
| <b>“How many repetitions were the players instructed to perform per set?”</b> | <b>n (%)</b> |
| More than 15 repetitions each week                                            | 1 (3)        |
| 12-15 repetitions each week                                                   | 3 (10)       |
| 7-10 repetitions each week                                                    | 16 (55)      |
| 3-5 repetitions each week                                                     | 1 (3)        |
| 3-15 repetitions, weekly progressive as in protocol                           | 3 (10)       |

3-15 repetitions, weekly progressive as own modification 5 (17)

ASP - Adductor Strengthening Programme

\*Specified as under normal circumstances, e.g., not influenced by Covid-19

**Table 3: Overview of reported training volume of the Adductor Strengthening Programme during in-season\***

| <b>“How often were the players instructed to perform the ASP?”</b>            | <b>n (%)</b> |
|-------------------------------------------------------------------------------|--------------|
| More than once a week                                                         | 9 (31)       |
| Once a week                                                                   | 16 (55)      |
| Once every two weeks                                                          | 2 (7)        |
| We carried out the program, but less than once every two weeks                | 2 (7)        |
| <b>“How many sets were the players instructed to perform per side?”</b>       | <b>n (%)</b> |
| More than 2 sets per side                                                     | 7 (24)       |
| 2 sets per side                                                               | 18 (62)      |
| 1 set per side                                                                | 4 (14)       |
| <b>“How many repetitions were the players instructed to perform per set?”</b> | <b>n (%)</b> |
| More than 15 repetitions                                                      | 1 (3)        |
| 12-15 repetitions                                                             | 6 (21)       |
| 8-11 repetitions                                                              | 14 (48)      |
| 4-7 repetitions                                                               | 8 (28)       |

ASP - Adductor Strengthening Programme

\*Specified as under normal circumstances, e.g., not influenced by Covid-19

## Facilitators and barriers

The most often stated reasons to use the ASP were first, the documented preventive effect of the ASP (100%, both in current and subsequent season) and second, that no additional equipment is needed (52% in current and 43% in subsequent season) (Figure 2). On an open-ended non-mandatory question, four respondents (27%) defined an indirect performance enhancing effect as an additional positive effect of ASP. Five (31%) respondents described the ASP progression levels as being too demanding, while four (25%) thought it was likely to cause muscle soreness. Two of these four respondents indicated soreness was a reason for modifying the original ASP protocol.

**[INSERT FIGURE 2 WITH LEGEND HERE]**

## DISCUSSION

The primary aim of the present study was to use the RE-AIM framework to investigate attitudes, beliefs, and behaviour regarding the ASP among delivery agents of injury prevention exercises in Norwegian male professional football teams. A secondary aim was to identify a real-world application of the ASP used in a professional team setting. The main findings were that all delivery agents were aware of the ASP, all thought the programme can mitigate the burden of groin problems, all stated to use the ASP in their team the current season and, almost everyone planned to continue using it in the subsequent season. However, only 10% used the ASP in accordance with the original ASP protocol.

### Attitudes and beliefs to groin problems and the Adductor Strengthening

#### Programme

Knowing the extent of an injury problem and the associated injury risk is the first crucial step towards successful real-world implementation of injury prevention exercises.<sup>9 15-17</sup> In this study, 97% of the delivery agents considered football players to be at great or moderate risk of sustaining groin problems, which aligns well with epidemiological studies on groin injury rates.<sup>13 18</sup> Moreover, successful real-world implementation also depends on the targeted population being aware of the given injury prevention intervention.<sup>19 20</sup> Therefore, it is encouraging that all surveyed delivery agents were aware of the ASP. The awareness level in the current study is better than demonstrated for the Copenhagen Adduction exercise among coaches in a recent study<sup>11</sup> and, better than the awareness of the injury prevention exercise programme FIFA 11+ among team staff<sup>21</sup> in male professional football. The high awareness level of the ASP among the delivery agents in the current study can be attributed to the fact that the original scientific research on the ASP was conducted in Norway, too.

Another premise for successful real-world implementation is that key stakeholders think that the given programme can mitigate the relevant injury problem.<sup>9 22</sup> In this study, all the delivery agents considered the ASP to be capable of mitigating the burden of groin problems. This result is consistent with a recent study among coaches in international male professional teams, rating the Copenhagen Adduction exercise as effective to prevent groin injuries.<sup>11</sup>

1  
2  
3 Importantly, it is also consistent with the only clinical trial evaluating the ASP's effect,  
4 demonstrating a 41% lower risk of groin problems in the intervention group.<sup>2</sup>  
5  
6  
7

## 8 9 **Implementation of the Adductor Strengthening Programme**

10  
11 All respondents reported using the ASP throughout the entire season. This is a slightly better  
12 adoption rate than shown in a recent study of the Copenhagen Adduction exercise in  
13 international male professional teams.<sup>11</sup> To be successful, the final step of any injury  
14 prevention exercise implemented in the real-world setting is that the exercise or the program  
15 is maintained over multiple seasons. In our study, a total of 97% of the delivery agents  
16 planned to continue using the ASP in the subsequent season. This planned continued usage is  
17 considerably more extensive than what previously has been reported among players  
18 experienced in the use of the ASP.<sup>10</sup> A particular challenge, however, is that team staff  
19 members, including medical staff, are frequently replaced when managers are replaced,  
20 increasing the risk of preventative measures not being persistently maintained over time.<sup>20</sup> It  
21 is yet to be confirmed whether ASP has been established as part of the teams' or clubs' sports  
22 plans or policies on injury prevention measures.  
23  
24  
25  
26  
27  
28  
29  
30  
31  
32  
33

## 34 **Real-world application of the Adductor Strengthening Programme**

35  
36 When implementing the programme, the current study shows that delivery agents in  
37 professional football usually modify the ASP to fit their team's training context. Similar  
38 findings have been demonstrated for the Nordic Hamstring exercise programme<sup>23 24</sup> and the  
39 FIFA 11+.<sup>25 26</sup> So far, no other studies on specific modifications of single-exercise injury  
40 prevention programmes exist.  
41  
42  
43  
44  
45  
46

47 The original ASP protocol prescribes a pre-season strengthening phase containing a detailed  
48 eight-week progression, and an in-season maintenance phase with a continuous number of  
49 repetitions (Table 4). The intention of the ASP original protocol is first, to provide hip  
50 adductor muscle strength gains in players and second, to maintain the increased muscle  
51 strength, as reduced hip adductor muscle strength is the only consistently reported risk factor  
52 for groin injury in sports.<sup>27</sup>  
53  
54  
55  
56  
57  
58  
59  
60

Compared to the original programme, the delivery agents usually prescribed two sets per side instead of one set per side throughout the whole season, however, with fewer repetitions per set, especially during in-season. Furthermore, they generally conducted fewer sessions per week during pre-season, and the vast majority did not adopt the detailed eight-week progression recommendation during pre-season. Table 4 shows the most often-used ASP modifications, which we consider to be an identified real-world application of the ASP protocol used in a professional team setting.

**Table 4:** Adductor Strengthening Programme real-world application in Norwegian male professional football teams and, the original protocol<sup>2</sup>

| <b>Adductor Strengthening Programme – real-world application</b> |                   |               |                      |       |
|------------------------------------------------------------------|-------------------|---------------|----------------------|-------|
| Week                                                             | Sessions per week | Sets per side | Repetitions per side |       |
| Pre-season – week 1-8                                            | 2                 | 2             | 7-10                 |       |
| In-season – all weeks                                            | 1                 | 2             | 8-11                 |       |
| <b>Adductor Strengthening Programme – original protocol</b>      |                   |               |                      |       |
| Week                                                             | Sessions per week | Sets per side | Repetitions per side |       |
|                                                                  | 1                 | 2             | 1                    | 3-5   |
| Pre-season                                                       | 2                 | 3             | 1                    | 3-5   |
|                                                                  | 3-4               | 3             | 1                    | 7-10  |
|                                                                  | 5-6               | 3             | 1                    | 12-15 |
|                                                                  | 7-8               | 2             | 1                    | 12-15 |
| In-season – all weeks                                            | 1                 | 1             | 12-15                |       |

We did not investigate why the delivery agents modified the ASP. However, a potential reason for non-progression during pre-season strengthening phase might be that the delivery agents consider most professional players to already have gained, and maintained, adequate hip adductor muscle strength. This would limit the delivery agent's perceived need for players to commence a progressive strengthening phase. Another reason for the modifications of the ASP could also be lack of support and acceptance from players and/or coaches. Such support is considered a key facilitator in the implementation process<sup>9 21</sup> and, motivation to comply with the original ASP protocol has already been shown to be low among players.<sup>10</sup> A reason for modifying previous injury prevention strengthening exercises has been attributed to a

1  
2  
3 possible fear of muscle soreness.<sup>12 28</sup> However, only two respondents reported to have  
4 modified the ASP partly due to such fear, and there is evidence that even the most strenuous  
5 level of the ASP barely caused any reported muscle soreness if the number of repetitions was  
6 progressed gradually.<sup>29 30</sup> Consequently, fear of muscle soreness seems to not be an important  
7 barrier to optimal ASP implementation in the real-world setting.  
8  
9  
10  
11  
12

### 13 **Effectiveness of the modifications of the real-world application**

14  
15  
16 An important aspect is that the delivery agents modify the ASP without knowing the impact.  
17 As mentioned, the ASP aims to mitigate groin problems by targeting hip adductor muscle  
18 strength. There is compelling evidence that muscle strength effects are dose dependent,<sup>31</sup>  
19 which also has been suggested for the Copenhagen Adduction exercise.<sup>32</sup> The reported used  
20 pre-season ASP exercise volume is approximately 640 repetitions during eight weeks, which,  
21 interestingly, is a higher volume than what the evidence-based original ASP protocol  
22 prescribes (470 repetitions).<sup>2</sup> Moreover, it accommodates a suggested minimum of 500-800  
23 repetitions during eight weeks, when aiming to facilitate meaningful hip adductor muscle  
24 strength gains.<sup>32</sup> Since the reported used weekly in-season ASP exercise volume is almost  
25 equal to pre-season, it is reasonable to assume that players somewhat maintain their hip  
26 adductor muscle strength during in-season.  
27  
28  
29  
30  
31  
32  
33  
34  
35  
36

37 Beyond volume considerations, progression seems required to elicit the greatest strength  
38 training gains.<sup>33</sup> As the ASP consists of a bodyweight exercise, weekly increase in the number  
39 of repetitions is the main progression variable. A critical assessment is therefore whether the  
40 reported lack of pre-season progression can reduce the ASP's effectiveness in groin problem  
41 mitigation. Additionally, muscle strength gains also depends on recruitment of high-threshold  
42 motor units, through accumulation of neuromuscular fatigue induced when performing sets to  
43 at least somewhat near neuromuscular failure.<sup>34</sup> Therefore, another critical assessment would  
44 be whether more sets but fewer repetitions per set, as respondents have reported, affect the  
45 ASP's effectiveness.  
46  
47  
48  
49  
50  
51  
52  
53

54 So far, changes in physiological characteristics when performing the ASP, such as effects on  
55 muscle cross-sectional area and architecture, musculotendinous stiffness, and motor unit  
56 recruitment and synchronization,<sup>33</sup> have not been scientifically investigated. Similarly, the  
57 exact dose-response relationship between ASP exercise volume and hip adductor muscle  
58  
59  
60



1  
2  
3 strength gains, and between ASP exercise volume and groin injury mitigation rates also  
4 remains to be investigated. And lastly, the importance of a progression strengthening phase(s)  
5 when aiming to mitigate groin problems, is unknown. Discussions around the most often-used  
6 modification's impact on the ASP's effectiveness are therefore currently theoretical, only.  
7  
8  
9

10  
11 Consequently, we will argue that there is no convincing evidence claiming that the ASP  
12 modifications applied by the delivery agents affect the mitigation of groin problems in male  
13 professional players, compared to the original protocol. Additionally, considerations on ASP  
14 exercise volume and other modifications are subordinated to the fact that no injury prevention  
15 programme will reach its full potential unless it is implemented, adopted, and maintained, by  
16 teams in the real-world setting.<sup>20</sup>  
17  
18  
19  
20  
21  
22

## 23 24 **Methodological considerations**

25  
26 The high response rate (91%) is a strength of this study. However, it is uncertain whether our  
27 results can be generalised to other delivery agents and professional football settings outside  
28 Norway. Especially, considering that the literature on ASP and the Copenhagen Adduction  
29 exercise primarily has been conducted in Norway and Denmark. A further strength of the  
30 current study is the pilot testing of the questionnaire ensuring valuable input to the final  
31 questionnaire. A limitation is that the internal validity of the questionnaire was not  
32 systematically explored, which is a prerequisite to draw firm valid conclusions.<sup>35</sup> The pilot  
33 study ensured, however, some degree of internal validity, by providing adequate  
34 understanding and readability of the questionnaire dimensions. Furthermore, questions related  
35 to the "implementation" dimensions, especially regarding the pre-season application of the  
36 ASP, are prone to some degree of recall bias as the survey was conducted towards the end of  
37 the competitive season.<sup>36</sup> Therefore, this study describes how the teams in overall perform the  
38 ASP, only, while it is likely that the programme was individualised depending on players  
39 previous injury record and experience with specific strength exercises. Moreover, this study  
40 did not include a question about delivery agents' perceived involvement in and support from  
41 players and coaches, which is considered a key facilitator to successful implementation in the  
42 real-world football setting.<sup>9</sup>  
43  
44  
45  
46  
47  
48  
49  
50  
51  
52  
53  
54  
55  
56

57  
58 Importantly, 79% of the respondents had a defined team staff role as a physiotherapist. This  
59 contrasts with previous studies, where surveyed delivery agents were either strength and  
60

1  
2  
3 conditioning coaches, head coaches or medical doctors.<sup>21 23 28 37 38</sup> It cannot be ruled out that  
4 some of the discrepancies in attitudes, beliefs and behaviour between the present and previous  
5 studies are due to differences in the participant's formal team staff role and educational  
6 background.  
7  
8  
9

## 10 11 12 13 **PERSPECTIVES** 14

15  
16 The delivery agents are aware of the ASP, they have adopted it, and they anticipate  
17 maintaining the usage. The implementation of the programme, however, is slightly different  
18 in each team. Further studies are warranted to acquire knowledge about why the ASP is being  
19 modified, and the impact of the modifications on the ASP's effectiveness. As this in previous  
20 studies primarily has been conducted in male adult teams, future studies should include  
21 women's and youth football, too. Also, widespread dissemination of the ASP outside the  
22 Scandinavian countries is needed to achieve reach world-wide. Finally, as recommended,<sup>9</sup>  
23 similar investigations of attitudes, beliefs, and behaviour to the ASP among other stakeholder,  
24 e.g. coaches, club officials and relevant sporting organisations, are needed in order to further  
25 explore the complexity of introducing preventative measures in the real-world professional  
26 setting.  
27  
28  
29  
30  
31  
32  
33  
34  
35  
36  
37  
38

## 39 **CONCLUSION** 40

41 The present study found that delivery agents of injury prevention exercises in Norwegian  
42 male professional football teams have positive attitudes and beliefs to the ASP, using it  
43 frequently and planning to maintain the usage of it in the subsequent season. Most delivery  
44 agents, however, instructed players to complete the ASP with modifications. Therefore, we  
45 have identified a real-world application of the ASP protocol used in a professional team  
46 setting.  
47  
48  
49  
50  
51

## 52 **Acknowledgements** 53

54 The authors would like to thank Ben Clarsen for review of and helpful comments on the  
55 manuscript. The authors would also like to thank all the delivery agents for their participation  
56 in the study.  
57  
58  
59  
60

### Author contributions

All authors planned the study. The data collection and the data analysis were done by JS. All authors have been involved in the drafting and the revision of the manuscript, and all have approved the final version.

### Competing interests

None declared

### Funding

The Oslo Sports Trauma Research Center has been established at the Norwegian School of Sport Sciences through generous grants from the Royal Norwegian Ministry of Culture, the South-Eastern Norway Regional Health Authority, the International Olympic Committee, the Norwegian Olympic Committee and Confederation of Sport, and Norsk Tipping AS. The authors have not declared a specific grant for this research from these agencies.

### Patient and public involvement

Three experienced delivery agents (two physiotherapists and one football coach) not involved as participants did pilot test the questionnaire and gave feedback on its understanding and readability. Patients and/or the public were not involved in any other part of the conduct, or reporting, or dissemination plans of this research.

### Ethics approval

This study involves human participants and was approved by the ethics board at the Norwegian School of Sport Sciences (134-130820) and from the Norwegian Centre for Research Data (NSD 2020/837286) prior to conducting this study. All respondents gave informed consent to participate.

### Data sharing statement

All de-identified data is available upon reasonable request. Suitability of data request and access to data will be determined by all authors collectively.

## REFERENCES

1. Waldén M, Hagglund M, Ekstrand J. The epidemiology of groin injury in senior football: a systematic review of prospective studies. *Br J Sports Med* 2015;49(12):792-7. doi: 10.1136/bjsports-2015-094705 [published Online First: 2015/04/03]
2. Harøy J, Clarsen B, Wiger EG, et al. The Adductor Strengthening Programme prevents groin problems among male football players: a cluster-randomised controlled trial. *British Journal of Sports Medicine* 2019;53(3):150-57. doi: 10.1136/bjsports-2017-098937
3. Harøy J, Clarsen B, Thorborg K, et al. Groin Problems in Male Soccer Players Are More Common Than Previously Reported. *Am J Sports Med* 2017;45(6):1304-08. doi: 10.1177/0363546516687539 [published Online First: 2017/03/17]
4. Serner A, Jakobsen MD, Andersen LL, et al. EMG evaluation of hip adduction exercises for soccer players: implications for exercise selection in prevention and treatment of groin injuries. *British Journal of Sports Medicine* 2014;48(14):1108-14. doi: 10.1136/bjsports-2012-091746
5. Engebretsen AH, Myklebust G, Holme I, et al. Prevention of injuries among male soccer players: a prospective, randomized intervention study targeting players with previous injuries or reduced function. *Am J Sports Med* 2008;36(6):1052-60. doi: 10.1177/0363546508314432 [published Online First: 2008/04/09]
6. Hölmich P, Larsen K, Krogsgaard K, et al. Exercise program for prevention of groin pain in football players: a cluster-randomized trial. *Scandinavian journal of medicine & science in sports* 2010;20(6):814-21.
7. O'Brien J, Donaldson A, Finch CF. It will take more than an existing exercise programme to prevent injury. *Br J Sports Med* 2016;50(5):264-5. doi: 10.1136/bjsports-2015-094841 [published Online First: 2015/07/15]
8. Glasgow RE, Vogt TM, Boles SM. Evaluating the public health impact of health promotion interventions: the RE-AIM framework. *Am J Public Health* 1999;89(9):1322-7. doi: 10.2105/ajph.89.9.1322 [published Online First: 1999/09/04]
9. Finch CF, Donaldson A. A sports setting matrix for understanding the implementation context for community sport. *British Journal of Sports Medicine* 2010;44(13):973-78. doi: 10.1136/bjism.2008.056069
10. Harøy J, Wiger EG, Bahr R, et al. Implementation of the Adductor Strengthening Programme: Players primed for adoption but reluctant to maintain - A cross-sectional study. *Scand J Med Sci Sports* 2019;29(8):1092-100. doi: 10.1111/sms.13444 [published Online First: 2019/05/03]
11. Al Attar W, Husain M, Qasem A, et al. The Copenhagen Adduction Exercise is not Applied by the Majority of Professional and Semi-Professional Soccer Players and Coaches. *Annals of Applied Sport Science* 2021:e983. doi: 10.52547/aassjournal.983
12. McCall A, Pruna R, Van der Horst N, et al. Exercise-Based Strategies to Prevent Muscle Injury in Male Elite Footballers: An Expert-Led Delphi Survey of 21 Practitioners Belonging to 18 Teams from the Big-5 European Leagues. *Sports Medicine* 2020;50(9):1667-81. doi: 10.1007/s40279-020-01315-7
13. Von Elm E, Altman DG, Egger M, et al. The Strengthening the Reporting of Observational Studies in Epidemiology (STROBE) statement: guidelines for reporting observational studies. *Bulletin of the World Health Organization* 2007;85:867-72.

14. Canhoto A, Rose S, Spinks N. Management Research – Applying the Principles 2014.
15. Ageberg E, Bunke S, Lucander K, et al. Facilitators to support the implementation of injury prevention training in youth handball: A concept mapping approach. *Scand J Med Sci Sports* 2019;29(2):275-85. doi: 10.1111/sms.13323 [published Online First: 2018/10/20]
16. Finch CF, White P, Twomey D, et al. Implementing an exercise-training programme to prevent lower-limb injuries: considerations for the development of a randomised controlled trial intervention delivery plan. *Br J Sports Med* 2011;45(10):791-6. doi: 10.1136/bjsm.2010.081406 [published Online First: 2011/03/12]
17. Richmond SA, Donaldson A, Macpherson A, et al. Facilitators and Barriers to the Implementation of iSPRINT: A Sport Injury Prevention Program in Junior High Schools. *Clin J Sport Med* 2020;30(3):231-38. doi: 10.1097/jsm.0000000000000579 [published Online First: 2020/04/29]
18. Werner J, Hägglund M, Ekstrand J, et al. Hip and groin time-loss injuries decreased slightly but injury burden remained constant in men's professional football: the 15-year prospective UEFA Elite Club Injury Study. *Br J Sports Med* 2019;53(9):539-46. doi: 10.1136/bjsports-2017-097796 [published Online First: 2018/04/25]
19. Forman J, Heisler M, Damschroder LJ, et al. Development and application of the RE-AIM QuEST mixed methods framework for program evaluation. *Prev Med Rep* 2017;6:322-28. doi: 10.1016/j.pmedr.2017.04.002 [published Online First: 2017/04/30]
20. O'Brien J, Hägglund M, Bizzini M. Implementing injury prevention. The rocky road from RCT to real-world injury reduction 2018.
21. O'Brien J, Finch CF. Injury prevention exercise programmes in professional youth soccer: understanding the perceptions of programme deliverers. *BMJ Open Sport Exerc Med* 2016;2(1):e000075. doi: 10.1136/bmjsem-2015-000075 [published Online First: 2016/12/03]
22. Finch CF, Doyle TL, Dempsey AR, et al. What do community football players think about different exercise-training programmes? Implications for the delivery of lower limb injury prevention programmes. *Br J Sports Med* 2014;48(8):702-7. doi: 10.1136/bjsports-2013-092816 [published Online First: 2013/09/21]
23. Al Attar WSA, Soomro N, Sinclair PJ, et al. Implementation of an evidence-based injury prevention program in professional and semi-professional soccer. *International Journal of Sports Science & Coaching* 2018;13(1):113-21. doi: 10.1177/1747954117707482
24. Bahr R, Thorborg K, Ekstrand J. Evidence-based hamstring injury prevention is not adopted by the majority of Champions League or Norwegian Premier League football teams: the Nordic Hamstring survey. *Br J Sports Med* 2015;49(22):1466-71. doi: 10.1136/bjsports-2015-094826 [published Online First: 2015/05/23]
25. O'Brien J, Young W, Finch CF. The use and modification of injury prevention exercises by professional youth soccer teams. *Scand J Med Sci Sports* 2017;27(11):1337-46. doi: 10.1111/sms.12756 [published Online First: 2016/10/08]
26. Shamlaye J, Tomšovský L, Fulcher ML. Attitudes, beliefs and factors influencing football coaches' adherence to the 11+ injury prevention programme. *BMJ Open Sport & Exercise Medicine* 2020;6(1):e000830. doi: 10.1136/bmjsem-2020-000830
27. Whittaker JL, Small C, Maffey L, et al. Risk factors for groin injury in sport: an updated systematic review. *Br J Sports Med* 2015;49(12):803-9. doi: 10.1136/bjsports-2014-094287 [published Online First: 2015/04/03]
28. McCall A, Dupont G, Ekstrand J. Injury prevention strategies, coach compliance and player adherence of 33 of the UEFA Elite Club Injury Study teams: a survey of teams'

- 1  
2  
3 head medical officers. *British Journal of Sports Medicine* 2016;50(12):725-30. doi:  
4 10.1136/bjsports-2015-095259
- 5 29. Harøy J, Thorborg K, Serner A, et al. Including the Copenhagen Adduction Exercise in  
6 the FIFA 11+ Provides Missing Eccentric Hip Adduction Strength Effect in Male  
7 Soccer Players: A Randomized Controlled Trial. *Am J Sports Med* 2017;45(13):3052-  
8 59. doi: 10.1177/0363546517720194 [published Online First: 2017/08/15]
- 9 30. Polglass G, Burrows A, Willett M. Impact of a modified progressive Copenhagen  
10 adduction exercise programme on hip adduction strength and postexercise muscle  
11 soreness in professional footballers. *BMJ Open Sport & Exercise Medicine*  
12 2019;5(1):e000570. doi: 10.1136/bmjsem-2019-000570
- 13 31. Ralston GW, Kilgore L, Wyatt FB, et al. The Effect of Weekly Set Volume on Strength  
14 Gain: A Meta-Analysis. *Sports Med* 2017;47(12):2585-601. doi: 10.1007/s40279-017-  
15 0762-7 [published Online First: 2017/07/30]
- 16 32. Ishøi L, Thorborg K. Copenhagen adduction exercise can increase eccentric strength and  
17 mitigate the risk of groin problems: but how much is enough! *British Journal of Sports  
18 Medicine* 2021:bjsports-2020-103564. doi: 10.1136/bjsports-2020-103564
- 19 33. Suchomel TJ, Nimphius S, Bellon CR, et al. The Importance of Muscular Strength:  
20 Training Considerations. *Sports Medicine* 2018;48(4):765-85. doi: 10.1007/s40279-  
21 018-0862-z
- 22 34. Pescatello LS, Riebe D, Thompson PD. ACSM's guidelines for exercise testing and  
23 prescription: Lippincott Williams & Wilkins 2014.
- 24 35. Pripp AH. Validitet. *Tidsskrift for den Norske Laegeforening* 2018;138(13) doi:  
25 10.4045/tidsskr.18.0398
- 26 36. Porta M. A Dictionary of Epidemiology: Oxford University Press 2014.
- 27 37. McCall A, Carling C, Nedelec M, et al. Risk factors, testing and preventative strategies  
28 for non-contact injuries in professional football: current perceptions and practices of  
29 44 teams from various premier leagues. *Br J Sports Med* 2014;48(18):1352-7. doi:  
30 10.1136/bjsports-2014-093439 [published Online First: 2014/05/20]
- 31 38. McCall A, Davison M, Andersen TE, et al. Injury prevention strategies at the FIFA 2014  
32 World Cup: perceptions and practices of the physicians from the 32 participating  
33 national teams. *British Journal of Sports Medicine* 2015;49(9):603-08. doi:  
34 10.1136/bjsports-2015-094747
- 35  
36  
37  
38  
39  
40  
41  
42  
43  
44  
45  
46  
47  
48  
49  
50  
51  
52  
53  
54  
55  
56  
57  
58  
59  
60

1  
2  
3  
4  
5  
6  
7  
8  
9  
10  
11  
12  
13  
14  
15  
16  
17  
18  
19  
20  
21  
22  
23  
24  
25  
26  
27  
28  
29  
30  
31  
32  
33  
34  
35  
36  
37  
38  
39  
40  
41  
42  
43  
44  
45  
46  
47  
48  
49  
50  
51  
52  
53  
54  
55  
56  
57  
58  
59  
60

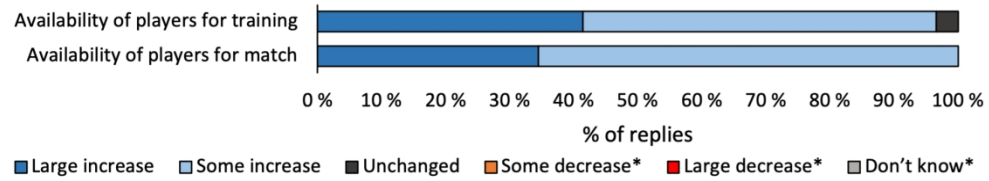

Figure 1: Beliefs regarding whether Adductor Strengthening Programme can influence availability of players in training and match-play. \*No respondent replied some decrease, large decrease or don't know.

382x75mm (130 x 130 DPI)

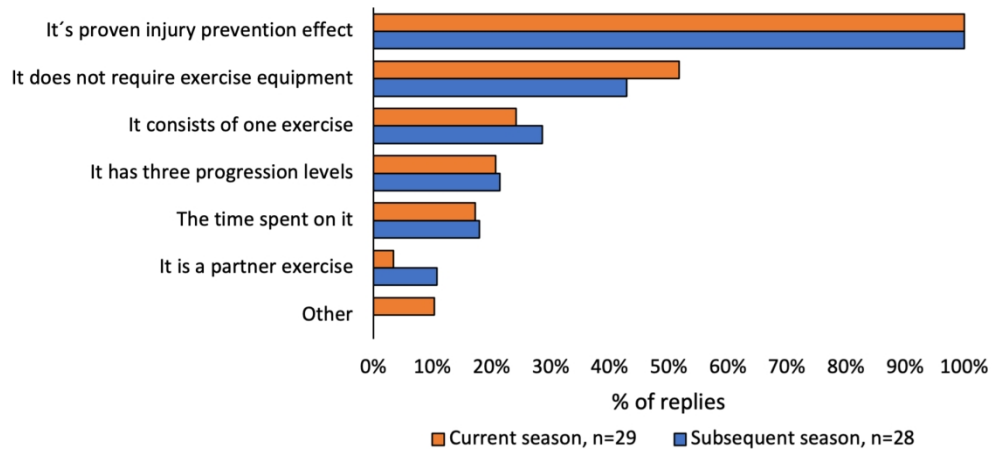

Figure 2: Reasons for choosing to use the Adductor Strengthening Programme this season and reasons for planning using the programme the following season.

372x174mm (130 x 130 DPI)



# Questionnaire

Have you read and approved the informed consent?

- Yes

1. What is your age?

- 18-30 years  
 31-45 years  
 46-60 years  
 More than 60 years

2. At what level does the team where you are employed play?

- Eliteserien (Norwegian Premier League)  
 OBOS-ligaen (Norwegian First Division)

3. What is your role in the team staff where you are employed?

- Head coach  
 Assistant coach  
 Fitness coach  
 Physiotherapist  
 Medical doctor  
 Other healthcare profession (specify) \_\_\_\_\_  
 Other position (specify) \_\_\_\_\_

4. What education and / or courses do you have?

It is possible to check several options

- UEFA PRO License  
 UEFA A License  
 UEFA B License  
 One-year study in sport science  
 Bachelor's degree in sport science  
 Master's degree in sport science  
 Bachelor's degree in a health profession  
 Master's degree in a health profession  
 Other education and/or courses (specify) \_\_\_\_\_

- 1  
2  
3 5. How many years of experience do you have as delivery agent of preventative training  
4 for football players?  
5  
6  0-4 years  
7  5-9 years  
8  10-14 years  
9  15-20 years  
10  More than 20 years  
11  
12  
13

14 **Further, you will get two questions that deal with groin problems.**

15 By groin problems is meant any pain, ache, stiffness, clicking/catching or other complaints  
16 related to the groin, or reduced training participation, training volume or performance due to  
17 groin problems.  
18  
19

- 20  
21 6. How much risk do you think football players have getting groin problems?  
22  Great risk  
23  Moderate risk  
24  Small risk  
25  No risk  
26  Don't know  
27  
28  
29  
30  
31 7. How important do you think it is to perform preventative training to mitigate groin  
32 problems?  
33  Greatly important  
34  Moderately important  
35  A little important  
36  Not important  
37  Don't know  
38  
39  
40  
41 8. Were you aware of the "Adductor Strengthening Programme" and/or the "Copenhagen  
42 Adduction" exercise prior to reading the information in the introduction to this  
43 questionnaire?  
44  Yes  
45  No  
46  Don't know  
47  
48  
49  
50  
51  
52  
53  
54  
55  
56  
57  
58  
59  
60

- 1  
2  
3 9. Where did you get information about the “Adductor Strengthening Programme”  
4 and/or the "Copenhagen Adduction Exercise"?

5  
6 It is possible to check several options

- 7  “Skadefri” website  
8  “Skadefri” application  
9  Article in the British Journal of Sports Medicine  
10  Conference/course  
11  Infographics  
12  Social media (Twitter, Facebook, Instagram etc.)  
13  Other (specify) \_\_\_\_\_  
14  Don’t know

- 15  
16  
17  
18  
19 10. Check if you are aware that you can find information about the “Adductor  
20 Strengthening Programme” and/or the «Copenhagen Adduction Exercise» in these  
21 relevant places:

22  
23 It is possible to check several options

- 24  “Skadefri” website  
25  “Skadefri” application  
26  Article in the British Journal of Sports Medicine  
27  Infographics  
28  Social media (Twitter, Facebook, Instagram etc.)  
29  Other (specify) \_\_\_\_\_

30  
31  
32  
33  
34 **Further, you will get two questions that deal with groin problems.**

35 By groin problems is meant any pain, ache, stiffness, clicking/catching or other complaints  
36 related to the groin, or reduced training participation, training volume or performance due to  
37 groin problems.  
38

- 39  
40  
41 11. Do you think that the “Adductor Strengthening Programme” can influence the burden  
42 of groin problems?

- 43  Yes, the program can greatly mitigate the burden  
44  Yes, the program can moderately mitigate the burden  
45  No, the program cannot have an effect on the burden  
46  Yes, the program can moderately aggravate the burden  
47  Yes, the program can greatly aggravate the burden  
48  Don’t know  
49  
50  
51  
52  
53  
54  
55  
56  
57  
58  
59  
60

1  
2  
3 12. Do you think that the “Adductor Strengthening Programme” can influence football  
4 performance?  
5

- 6  Yes, the program can greatly increase performance  
7  Yes, the program can moderately increase performance  
8  No, the program cannot have an effect on performance  
9  Yes, the program can moderately decrease performance  
10  Yes, the program can greatly decrease performance  
11  Don't know  
12  
13  
14

15 **How do you think the following of the players' physical skills may be affected by doing**  
16 **the “Adductor Strengthening Programme”?**  
17

18  
19 13. Linear acceleration?  
20

- 21  Large increase  
22  Some increase  
23  Unchanged  
24  Some decrease  
25  Large decrease  
26  Don't know  
27  
28  
29

30 14. Top speed?  
31

- 32  Large increase  
33  Some increase  
34  Unchanged  
35  Some decrease  
36  Large decrease  
37  Don't know  
38  
39  
40

41 15. Change of direction?  
42

- 43  Large increase  
44  Some increase  
45  Unchanged  
46  Some decrease  
47  Large decrease  
48  Don't know  
49  
50  
51  
52  
53  
54  
55  
56  
57  
58  
59  
60

## 16. Vertical jump ability?

- Large increase
- Some increase
- Unchanged
- Some decrease
- Large decrease
- Don't know

## 17. Duelling power?

- Large increase
- Some increase
- Unchanged
- Some decrease
- Large decrease
- Don't know

**How do you think other factors can may be affected by doing the “Adductor Strengthening Programme”:**

## 18. Availability of players for match?

- Large increase
- Some increase
- Unchanged
- Some decrease
- Large decrease
- Don't know

## 19. Availability of players for training?

- Large increase
- Some increase
- Unchanged
- Some decrease
- Large decrease
- Don't know

## 20. Chance of winning a match?

- Large increase
- Some increase
- Unchanged
- Some decrease
- Large decrease
- Don't know

1  
2  
3 21. What other positive characteristics / achievements / consequences do you think the  
4 “Adductor Strengthening Programme” can provide? Describe in your own words.  
5

6  
7  
8  
9  
10  
11  
12

13  
14 22. What other negative characteristics / achievements / consequences do you think the  
15 “Adductor Strengthening Programme” can provide? Describe in your own words.  
16

17  
18  
19  
20  
21  
22

23  
24 23. Do you use the “Adductor Strengthening Programme” in your team?  
25

- 26  Yes, as described in the protocol  
27  Yes, as modified version  
28  No  
29  Don't know  
30  
31

32  
33 24. How do you use the “Adductor Strengthening Programme” in your training schedule?  
34

- 35  As part of organised football training  
36  As part of organised strength training  
37  As an independent preparation in the locker room or strength room before  
38 training  
39  As guided preparation in the locker room or strength room before training  
40  As independent training in a separate strength training session  
41  Other way (specify) \_\_\_\_\_  
42  
43  
44

45 **When using the “Adductor Strengthening Programme” in season (under normal**  
46 **circumstances, not influenced by covid-19):**  
47

48  
49 25. How often did the players perform the program?  
50

- 51  More than once a week  
52  Once a week  
53  Once every two weeks  
54  We carried out the program, but less than once every two weeks  
55  
56

57 26. How many sets did the players perform?  
58

- 59  More than 2 sets per side  
60  2 sets per side

- 1  
2  
3  1 set per side  
4  
5

6 27. How many repetitions did the players perform in each set?

- 7  More than 15 repetitions per side  
8  12-15 repetitions per side  
9  8-11 repetitions per side  
10  4-7 repetitions per side  
11  Less than 4 repetitions per side  
12  
13  
14

15 **When using the “Adductor Strengthening Programme” in preseason (under normal**  
16 **circumstances, not influenced by covid-19):**  
17

18  
19 28. How often did the players perform the program?

- 20  More than 3 times a week  
21  3 times a week  
22  Twice a week  
23  Once a week  
24  We carried out the program, but less than once a week  
25  
26  
27  
28

29 29. How many sets did the players perform?

- 30  More than 2 sets per side  
31  2 sets per side  
32  1 set per side  
33  
34  
35

36 30. How many repetitions did the players perform in each set?

- 37  More than 15 repetitions per set each week  
38  12-15 repetitions per set each week  
39  7-10 repetitions per set each week  
40  3-5 repetitions per set each week  
41  3-15 repetitions per set, weekly progressive (as in protocol)  
42  3-15 repetitions per set, weekly progressive (as own modification)  
43  
44  
45  
46

47 31. What has been important for you in choosing to use the “Adductor Strengthening  
48 Programme”?

49 It is possible to check several options

- 50  The program's injury prevention effect  
51  The time spent on the program  
52  The programme consists of one exercise  
53  The programme consists of three progression levels  
54  The programme is a partner exercise  
55  The programme does not require exercise equipment  
56  Other (specify) \_\_\_\_\_  
57  
58  
59  
60

1  
2  
3  
4  
5  
6  
7  
8  
9  
10  
11  
12  
13  
14  
15  
16  
17  
18  
19  
20  
21  
22  
23  
24  
25  
26  
27  
28  
29  
30  
31  
32  
33  
34  
35  
36  
37  
38  
39  
40  
41  
42  
43  
44  
45  
46  
47  
48  
49  
50  
51  
52  
53  
54  
55  
56  
57  
58  
59  
60

32. Do you use other preventative training in addition to the “Adductor Strengthening Programme”, with the intention to mitigate the burden of groin problems?

- Yes
- No
- Don't know

33. What training do you use in addition to, or instead of, the “Adductor Strengthening Programme” to mitigate the burden of groin problems? Describe in your own words as detailed as possible which exercise (s), how they are performed, dosage (series, repetitions, intensity), and anything else you consider relevant.

34. Why did you choose to do what is described in the previous answer, and who participated in the decision? Describe in your own words.

35. Do you anticipate using the “Adductor Strengthening Programme” in your team the following season?

- Yes, as described in the protocol
- Yes, as an own modification
- No
- Don't know

36. What is the reason why you anticipate using the “Adductor Strengthening Programme” in your team in the following season?

It is possible to check several options

- The program's injury prevention effect
- The time spent on the program
- The program consists of one exercise
- The program consists of three progression levels
- The program can be performed as a partner exercise
- The program does not require exercise equipment
- Other (specify) \_\_\_\_\_



1  
2  
3 37. What is the reason why you do not anticipate using the “Adductor Strengthening  
4 Programme” in your team in the following season?

5  
6 It is possible to check several options

- 7  The program's lack of injury prevention effect  
8  The time spent on the program  
9  The program consists of only one exercise  
10  The program consists of only three levels of difficulty  
11  The program can be performed as a partner exercise  
12  The program does not require exercise equipment  
13  Other (specify) \_\_\_\_\_  
14  
15  
16  
17

18 38. Do you have any suggestions for changes to the “Adductor Strengthening  
19 Programme” that may make it more relevant to use the program? Describe in your  
20 own words.  
21

22  
23  
24  
25  
26  
27  
28  
29  
30  
31  
32  
33  
34  
35  
36  
37  
38  
39  
40  
41  
42  
43  
44  
45  
46  
47  
48  
49  
50  
51  
52  
53  
54  
55  
56  
57  
58  
59  
60

STROBE Statement—Checklist of items that should be included in reports of *cross-sectional studies*

|                              | Item No | Recommendation                                                                                                                                                                                               | Page No |
|------------------------------|---------|--------------------------------------------------------------------------------------------------------------------------------------------------------------------------------------------------------------|---------|
| <b>Title and abstract</b>    | 1       | (a) Indicate the study's design with a commonly used term in the title or the abstract                                                                                                                       | 2       |
|                              |         | (b) Provide in the abstract an informative and balanced summary of what was done and what was found                                                                                                          | 2       |
| <b>Introduction</b>          |         |                                                                                                                                                                                                              |         |
| Background/rationale         | 2       | Explain the scientific background and rationale for the investigation being reported                                                                                                                         | 4       |
| Objectives                   | 3       | State specific objectives, including any prespecified hypotheses                                                                                                                                             | 5       |
| <b>Methods</b>               |         |                                                                                                                                                                                                              |         |
| Study design                 | 4       | Present key elements of study design early in the paper                                                                                                                                                      | 5       |
| Setting                      | 5       | Describe the setting, locations, and relevant dates, including periods of recruitment, exposure, follow-up, and data collection                                                                              | 5       |
| Participants                 | 6       | (a) Give the eligibility criteria, and the sources and methods of selection of participants                                                                                                                  | 5       |
| Variables                    | 7       | Clearly define all outcomes, exposures, predictors, potential confounders, and effect modifiers. Give diagnostic criteria, if applicable                                                                     | -       |
| Data sources/<br>measurement | 8*      | For each variable of interest, give sources of data and details of methods of assessment (measurement). Describe comparability of assessment methods if there is more than one group                         | -       |
| Bias                         | 9       | Describe any efforts to address potential sources of bias                                                                                                                                                    | -       |
| Study size                   | 10      | Explain how the study size was arrived at                                                                                                                                                                    | 5-6     |
| Quantitative variables       | 11      | Explain how quantitative variables were handled in the analyses. If applicable, describe which groupings were chosen and why                                                                                 | 6       |
| Statistical methods          | 12      | (a) Describe all statistical methods, including those used to control for confounding                                                                                                                        | 6       |
|                              |         | (b) Describe any methods used to examine subgroups and interactions                                                                                                                                          | -       |
|                              |         | (c) Explain how missing data were addressed                                                                                                                                                                  | -       |
|                              |         | (d) If applicable, describe analytical methods taking account of sampling strategy                                                                                                                           | -       |
|                              |         | (e) Describe any sensitivity analyses                                                                                                                                                                        | -       |
| <b>Results</b>               |         |                                                                                                                                                                                                              |         |
| Participants                 | 13*     | (a) Report numbers of individuals at each stage of study—eg numbers potentially eligible, examined for eligibility, confirmed eligible, included in the study, completing follow-up, and analysed            | 5-6     |
|                              |         | (b) Give reasons for non-participation at each stage                                                                                                                                                         | 6       |
|                              |         | (c) Consider use of a flow diagram                                                                                                                                                                           | -       |
| Descriptive data             | 14*     | (a) Give characteristics of study participants (eg demographic, clinical, social) and information on exposures and potential confounders                                                                     | 6       |
|                              |         | (b) Indicate number of participants with missing data for each variable of interest                                                                                                                          | -       |
| Outcome data                 | 15*     | Report numbers of outcome events or summary measures                                                                                                                                                         | 6-8     |
| Main results                 | 16      | (a) Give unadjusted estimates and, if applicable, confounder-adjusted estimates and their precision (eg, 95% confidence interval). Make clear which confounders were adjusted for and why they were included | Ok      |

|                          |    |                                                                                                                                                                            |    |
|--------------------------|----|----------------------------------------------------------------------------------------------------------------------------------------------------------------------------|----|
|                          |    | (b) Report category boundaries when continuous variables were categorized                                                                                                  | -  |
|                          |    | (c) If relevant, consider translating estimates of relative risk into absolute risk for a meaningful time period                                                           | -  |
| Other analyses           | 17 | Report other analyses done—eg analyses of subgroups and interactions, and sensitivity analyses                                                                             | -  |
| <b>Discussion</b>        |    |                                                                                                                                                                            |    |
| Key results              | 18 | Summarise key results with reference to study objectives                                                                                                                   | 8  |
| Limitations              | 19 | Discuss limitations of the study, taking into account sources of potential bias or imprecision. Discuss both direction and magnitude of any potential bias                 | 13 |
| Interpretation           | 20 | Give a cautious overall interpretation of results considering objectives, limitations, multiplicity of analyses, results from similar studies, and other relevant evidence | 13 |
| Generalisability         | 21 | Discuss the generalisability (external validity) of the study results                                                                                                      | 13 |
| <b>Other information</b> |    |                                                                                                                                                                            |    |
| Funding                  | 22 | Give the source of funding and the role of the funders for the present study and, if applicable, for the original study on which the present article is based              | 14 |

\*Give information separately for exposed and unexposed groups.

**Note:** An Explanation and Elaboration article discusses each checklist item and gives methodological background and published examples of transparent reporting. The STROBE checklist is best used in conjunction with this article (freely available on the Web sites of PLoS Medicine at <http://www.plosmedicine.org/>, Annals of Internal Medicine at <http://www.annals.org/>, and Epidemiology at <http://www.epidem.com/>). Information on the STROBE Initiative is available at [www.strobe-statement.org](http://www.strobe-statement.org).

# BMJ Open

## The Adductor Strengthening Programme is successfully adopted but frequently modified in Norwegian male professional football teams: a cross sectional study

|                                 |                                                                                                                                                                                                                                                                                                                                                                                                     |
|---------------------------------|-----------------------------------------------------------------------------------------------------------------------------------------------------------------------------------------------------------------------------------------------------------------------------------------------------------------------------------------------------------------------------------------------------|
| Journal:                        | <i>BMJ Open</i>                                                                                                                                                                                                                                                                                                                                                                                     |
| Manuscript ID                   | bmjopen-2021-060611.R1                                                                                                                                                                                                                                                                                                                                                                              |
| Article Type:                   | Original research                                                                                                                                                                                                                                                                                                                                                                                   |
| Date Submitted by the Author:   | 26-Apr-2022                                                                                                                                                                                                                                                                                                                                                                                         |
| Complete List of Authors:       | Stensø, Joakim; Norwegian School of Sports Sciences, Department of Sports Medicine<br>Andersen, Thor Einar; Oslo Sports Trauma Research Center, Norwegian School of Sports Sciences, Department of Sports Medicine; Norwegian FA Medical Clinic<br>Harøy, Joar; Oslo Sports Trauma Research Center, Norwegian School of Sports Sciences, Department of Sports Medicine; Norwegian FA Medical Clinic |
| <b>Primary Subject Heading</b>: | Sports and exercise medicine                                                                                                                                                                                                                                                                                                                                                                        |
| Secondary Subject Heading:      | Sports and exercise medicine                                                                                                                                                                                                                                                                                                                                                                        |
| Keywords:                       | SPORTS MEDICINE, PREVENTIVE MEDICINE, REHABILITATION MEDICINE                                                                                                                                                                                                                                                                                                                                       |
|                                 |                                                                                                                                                                                                                                                                                                                                                                                                     |

SCHOLARONE™  
Manuscripts

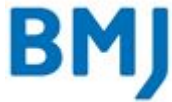

I, the Submitting Author has the right to grant and does grant on behalf of all authors of the Work (as defined in the below author licence), an exclusive licence and/or a non-exclusive licence for contributions from authors who are: i) UK Crown employees; ii) where BMJ has agreed a CC-BY licence shall apply, and/or iii) in accordance with the terms applicable for US Federal Government officers or employees acting as part of their official duties; on a worldwide, perpetual, irrevocable, royalty-free basis to BMJ Publishing Group Ltd ("BMJ") its licensees and where the relevant Journal is co-owned by BMJ to the co-owners of the Journal, to publish the Work in this journal and any other BMJ products and to exploit all rights, as set out in our [licence](#).

The Submitting Author accepts and understands that any supply made under these terms is made by BMJ to the Submitting Author unless you are acting as an employee on behalf of your employer or a postgraduate student of an affiliated institution which is paying any applicable article publishing charge ("APC") for Open Access articles. Where the Submitting Author wishes to make the Work available on an Open Access basis (and intends to pay the relevant APC), the terms of reuse of such Open Access shall be governed by a Creative Commons licence – details of these licences and which [Creative Commons](#) licence will apply to this Work are set out in our licence referred to above.

Other than as permitted in any relevant BMJ Author's Self Archiving Policies, I confirm this Work has not been accepted for publication elsewhere, is not being considered for publication elsewhere and does not duplicate material already published. I confirm all authors consent to publication of this Work and authorise the granting of this licence.

1  
2  
3 **The Adductor Strengthening Programme is successfully adopted**  
4 **but frequently modified in Norwegian male professional football**  
5 **teams: a cross sectional study**  
6  
7  
8  
9

10  
11  
12  
13  
14  
15  
16  
17 Joakim Stensø<sup>1</sup>, Thor Einar Andersen<sup>1,2</sup>, Joar Harøy<sup>1,2</sup>  
18

19  
20  
21 1 Oslo Sports Trauma Research Center, Department of Sports Medicine, Norwegian School  
22 of Sport Sciences, Oslo, Norway  
23

24 2 The Norwegian FA Medical Clinic, Oslo, Norway  
25

26  
27  
28 Corresponding author: Joakim Stensø

29 Postal address: Sørlogata 10 C, 0577 Oslo, Norway

30  
31 Email: [joakim.s.stenso@hotmail.no](mailto:joakim.s.stenso@hotmail.no)  
32  
33

34  
35 Word count: 3058  
36  
37  
38  
39  
40  
41  
42  
43  
44  
45  
46  
47  
48  
49  
50  
51  
52  
53  
54  
55  
56  
57  
58  
59  
60

## ABSTRACT

**Objectives:** Groin injuries represent a substantial problem in male football, with the Adductor Strengthening Programme (ASP) being the only exercise programme demonstrated to significantly reduce the risk of groin problems. We aimed first, to use the RE-AIM framework to investigate attitudes, beliefs, and behaviour to the ASP among injury prevention delivery agents (i.e., staff with main responsibility for implementing and conducting injury prevention exercises). Secondly, we aimed to identify a real-world application of the ASP protocol used in a professional team setting.

**Methods:** A descriptive cross-sectional survey of 32 injury prevention delivery agents in Norwegian male professional football teams. The questionnaire was designed to cover all five dimensions of the Reach Adoption Effectiveness Implementation Maintenance (RE-AIM) framework and, were pilot tested prior to the survey.

**Results:** Twenty-nine (91%) participants responded. All (100%) respondents were aware of the ASP and its potential to mitigate the burden of groin problems. The two most stated reasons for using the ASP were its injury preventive effect and that it does not require equipment. The ASP was adopted by all (100%) delivery agents, but only 10% used it in accordance with the original protocol. The main modifications were that the players in 72% of the teams were instructed to perform a non-progressive number of repetitions during pre-season, and in 86% of the teams instructed to perform more sets, but fewer repetitions per set, during in-season. In total, 97% of the delivery agents planned to continue using the ASP.

**Conclusion:** The delivery agents have positive attitudes and beliefs to the ASP, but they frequently modify it. We identified and reported a real-world application of the ASP protocol.

**Key words:** Football, groin injury, injury prevention, Adductor Strengthening Programme, Copenhagen Adduction, RE-AIM, implementation

### Strengths and limitations of this study

- The questionnaire was pilot tested by delivery agents with relevant experience.
- Thorough data collection process leading to a high response rate.
- The internal validity of the questionnaire was not systematically explored.
- Some of the questionnaire's questions are prone to recall bias as the survey was conducted towards the end of the competitive season.

### What is already known?

- The Adductor Strengthening Programme (ASP) prevents groin problems in football, and is suggested implemented in football training
- Many injury prevention programmes and exercises are not successfully implemented in a real-world setting, limiting their effectiveness
- Knowledge of attitudes, beliefs, and behaviour regarding injury prevention exercises is key for successful implementation

### What are the new findings?

- Team staff responsible for injury prevention exercises in Norwegian male professional football teams are aware of and familiar with the ASP and it's preventative effect
- The programme is widely adopted by all teams
- We have identified a real-world application of the programme used in a professional team setting



## INTRODUCTION

Groin problems represent a substantial problem in football. They account for 4-19% and 2-11% of all time-loss injuries in male and female football, respectively.<sup>1</sup> Moreover, the average weekly proportion of male players with any groin problem causing pain and/or reduced performance is 21% in a full competitive season<sup>2</sup> and, 29% in periods with match congestion.<sup>3</sup>

In a clinical trial, the Adductor Strengthening Programme (ASP) showed a significant 41% reduction in risk of groin problems in male semi-professional players performing the programme during one full season.<sup>2</sup> Consequently, dissemination and widespread implementation of the ASP in football training seems beneficial.<sup>2 4</sup> The ASP is based on a single-exercise, the Copenhagen Adduction (CA) exercise,<sup>4</sup> structured with three progression levels and a protocol with a pre-season and in-season exercise prescription. In the clinical trial, players completed on average about 70% of the recommended exercise prescription, demonstrating a considerably higher compliance than previous groin injury prevention programmes.<sup>5 6</sup> The high compliance is an important strength of the ASP, as only injury prevention programmes that are successfully implemented (i.e. widely adopted, complied with and maintained over time) will reach effectiveness outside controlled clinical trials.<sup>7</sup>

Gaining knowledge on attitudes, beliefs, and behaviour to injury prevention exercises are important when evaluating their implementation in the real-world setting.<sup>7</sup> For this purpose, integrating the Reach Effectiveness Adoption Implementation Maintenance (RE-AIM) framework<sup>8 9</sup> is recommended, ideally evaluated across all levels of the sport setting hierarchy.<sup>9</sup> In brief, the framework evaluates the proportion of a targeted population that is aware of a given intervention (Reach), the interventions positive outcomes (Effectiveness), the proportions that has adopted the intervention (Adoption) and implemented it as intended (Implementation), and the extent to which it is sustained (Maintenance).<sup>8 9</sup> Note that the specific RE-AIM implementation dimension refers to the extent to which an exercise or a programme is used as intended in the real-world setting.<sup>9</sup> The general term implementation also used in this article, however, refers to all initiatives applied to put an exercise or a programme into practice.<sup>10</sup>

1  
2  
3 Attitudes and beliefs towards the ASP is previously investigated among players participating  
4 in the clinical ASP trial.<sup>11</sup> The study revealed that only 31% of the players anticipated to  
5 continue using the ASP in accordance with the original protocol.<sup>11</sup> Also, a recent study on the  
6 CA among coaches in international male professional teams reported that 72% were aware of  
7 the exercise, while 94% of those had adopted it.<sup>12</sup> These findings are consistent with previous  
8 research emphasising that evidence-based injury prevention exercises can be challenging to  
9 apply in the real-world settings.<sup>13</sup> To enhance knowledge, we believed it was important to  
10 conduct a survey among team staff, specifically among those having the main responsibility  
11 for implementing and conducting injury prevention exercises (hereafter referred to as  
12 “delivery agents”).  
13  
14  
15  
16  
17  
18  
19  
20  
21

22 Therefore, the primary aim of this study was to use the RE-AIM framework to investigate  
23 attitudes, beliefs, and behaviour to the ASP among delivery agents of injury prevention  
24 exercises in Norwegian male professional football teams. The secondary aim was to identify a  
25 real-world application of the ASP protocol used in a professional team setting, which to our  
26 knowledge, previously has not been conducted for any single-exercise injury prevention  
27 programme.  
28  
29  
30  
31  
32  
33  
34  
35

## 36 METHODS

### 37 Study design and participants

38  
39 This was a cross-sectional study conducted in September and October 2020. Participants were  
40 the primary delivery agent in each team in the top two divisions of Norwegian male  
41 professional football (n=32): Eliteserien (n=16) and OBOS-ligaen (n=16). The study was  
42 approved by the ethics board at the Norwegian School of Sport Sciences (134-130820) and by  
43 the Norwegian Centre for Research Data (NSD 2020/837286), and all respondents gave  
44 informed consent to participate. The study is described according to the STROBE statement  
45 checklist for cross-sectional studies.<sup>14</sup>  
46  
47  
48  
49  
50  
51  
52  
53  
54  
55

### 56 Survey

57  
58 A new questionnaire designed to cover all dimensions of the RE-AIM<sup>8</sup> framework was  
59 developed. The final version consisted of 38 questions, primarily closed-ended. The  
60

1  
2  
3 questionnaire was developed and delivered in Norwegian, however, a translated English  
4 version is provided as an appendix to this paper (Supplementary file 1).  
5  
6  
7

## 8 9 **Data collection**

10 All delivery agents received an email with detailed information about the study and a link  
11 with access to an online survey software (SurveyXact, Rambøll Management Consulting AS,  
12 Oslo). We distributed the questionnaire during an international break in September 2020.  
13  
14 Weekly reminders were sent to non-responders by email for four weeks, and after five weeks,  
15 non-responders were contacted by telephone.  
16  
17  
18  
19  
20  
21

## 22 **Analysis**

23 We performed statistical analysis using SPSS statistical software (SPSS V24, IBM  
24 Corporation, Armonk, NY). Data consisted of categorical nominal variables, presented as  
25 proportions, including for the specific RE-AIM dimensions. Open-ended text responses were  
26 analysed using a qualitative content analysis.<sup>15</sup> One non-completed response was excluded  
27 from the analysis.  
28  
29  
30  
31  
32  
33

## 34 **Patient and public involvement**

35 Three experienced delivery agents (two physiotherapists and one football coach) not involved  
36 as participants did pilot test the questionnaire and gave feedback on its understanding and  
37 readability. Patients and/or the public were not involved in any other part of the conduct, or  
38 reporting, or dissemination plans of this research.  
39  
40  
41  
42  
43  
44  
45  
46  
47  
48  
49

# 50 **RESULTS**

## 51 **Participant characteristics**

52  
53 Twenty-nine (91%) of the 32 delivery agents participated in the survey (14 from Eliteserien  
54 and 15 from OBOS-ligaen). The non-responders gave no specific reasons for not  
55 participating. Twenty-three (79%) of the respondents were physiotherapists, five (17%) were  
56  
57  
58  
59  
60

1  
2  
3 strength and conditioning coaches and one (3%) was a naprapath. Respondents' experience as  
4 delivery agents in football is shown in Table 1.  
5  
6  
7

8 **Table 1: Years of experience as delivery agents of injury prevention exercises in football**  
9

| Years of experience as delivery agent | n (%)   |
|---------------------------------------|---------|
| 0-4 years                             | 5 (17)  |
| 5-9 years                             | 13 (45) |
| 10-14 years                           | 7 (24)  |
| 15-19 years                           | 3 (10)  |
| ≥ 20 years                            | 1 (3)   |

19  
20  
21  
22 **Attitudes to groin injury risk and importance of injury mitigation**  
23

24 Football players risk of getting a groin problem was assumed to be high or moderate by 19  
25 (66%) and 9 (31%) delivery agents, respectively, while one respondent considered the risk to  
26 be low. All (100%) respondents thought prevention exercises to mitigate groin problems was  
27 important, replied by 27 (93%) as highly important and by 2 (7%) as moderately important.  
28  
29  
30  
31

32  
33  
34 **Reach and effectiveness of the ASP**  
35

36 All (100%) respondents were aware of either one or both of ASP and the CA. All (100%)  
37 delivery agents thought the ASP has potential to successfully mitigate the burden of groin  
38 problems, with 11 (38%) perceiving the groin problem mitigation as large and 18 (62%)  
39 perceiving it as moderate. Beliefs about the ASP's effect on player availability can be viewed  
40 in Figure 1.  
41  
42  
43  
44  
45

46  
47  
48 **[INSERT FIGURE 1 WITH LEGEND HERE]**  
49  
50

51  
52 **Adoption and implementation of the ASP**  
53

54 All (100%) delivery agents had adopted the ASP in their team the current season, of which  
55 three (10%) replied that their usage was in accordance with the original ASP protocol. How  
56 the teams reported the usage of the ASP in terms of exercise frequency, sets and repetitions, is  
57 shown in Table 2 and 3 for pre-season and in-season, respectively.  
58  
59  
60

**Table 2: Overview of reported training volume of the Adductor Strengthening Programme (ASP) during pre-season\***

| <b>“How often were the players instructed to perform the ASP?”</b>            | <b>n (%)</b> |
|-------------------------------------------------------------------------------|--------------|
| More than 3 times a week                                                      | 2 (7)        |
| 3 times a week                                                                | 4 (14)       |
| Twice a week                                                                  | 16 (55)      |
| Once a week                                                                   | 5 (17)       |
| We carried out the program, but less than once a week                         | 2 (7)        |
| <b>“How many sets were the players instructed to perform per side?”</b>       | <b>n (%)</b> |
| More than 2 sets per side                                                     | 8 (28)       |
| 2 sets per side                                                               | 17 (59)      |
| 1 set per side                                                                | 4 (14)       |
| <b>“How many repetitions were the players instructed to perform per set?”</b> | <b>n (%)</b> |
| More than 15 repetitions each week                                            | 1 (3)        |
| 12-15 repetitions each week                                                   | 3 (10)       |
| 7-10 repetitions each week                                                    | 16 (55)      |
| 3-5 repetitions each week                                                     | 1 (3)        |
| 3-15 repetitions, weekly progressive as in protocol                           | 3 (10)       |
| 3-15 repetitions, weekly progressive as own modification                      | 5 (17)       |

\*Specified as under normal circumstances, e.g., not influenced by Covid-19

**Table 3: Overview of reported training volume of the Adductor Strengthening Programme (ASP) during in-season\***

| <b>“How often were the players instructed to perform the ASP?”</b>            | <b>n (%)</b> |
|-------------------------------------------------------------------------------|--------------|
| More than once a week                                                         | 9 (31)       |
| Once a week                                                                   | 16 (55)      |
| Once every two weeks                                                          | 2 (7)        |
| We carried out the program, but less than once every two weeks                | 2 (7)        |
| <b>“How many sets were the players instructed to perform per side?”</b>       | <b>n (%)</b> |
| More than 2 sets per side                                                     | 7 (24)       |
| 2 sets per side                                                               | 18 (62)      |
| 1 set per side                                                                | 4 (14)       |
| <b>“How many repetitions were the players instructed to perform per set?”</b> | <b>n (%)</b> |
| More than 15 repetitions                                                      | 1 (3)        |
| 12-15 repetitions                                                             | 6 (21)       |
| 8-11 repetitions                                                              | 14 (48)      |
| 4-7 repetitions                                                               | 8 (28)       |

\*Specified as under normal circumstances, e.g., not influenced by Covid-19

The most often-used ASP modifications are summed up in Table 4, which is the identified real-world application of the ASP protocol used in a professional team setting.

**Table 4:** Adductor Strengthening Programme- real-world application in Norwegian male professional football teams

| <b>Adductor Strengthening Programme – real-world application</b> |                   |               |                      |
|------------------------------------------------------------------|-------------------|---------------|----------------------|
| Week                                                             | Sessions per week | Sets per side | Repetitions per side |
| Pre-season – week 1-8                                            | 2                 | 2             | 7-10                 |
| In-season – all weeks                                            | 1                 | 2             | 8-11                 |

### Maintenance of the ASP

Twenty-eight (97%) delivery agents planned to continue using the ASP in the subsequent season, of which 20 (71%) planned using a modified protocol.

### Facilitators and barriers to implementation of the ASP

The most often stated reasons to use the ASP were first, the documented preventive effect of the ASP (100%, both in current and subsequent season) and second, that no additional equipment is needed (52% in current and 43% in subsequent season) (Figure 2). On an open-ended non-mandatory question, four respondents (27%) defined an indirect performance enhancing effect as an additional positive effect of ASP. Five (31%) respondents described the ASP progression levels as being too demanding, while four (25%) thought it was likely to cause muscle soreness. Two of these four respondents indicated soreness was the reason for modifying the original ASP protocol.

[INSERT FIGURE 2 WITH LEGEND HERE]

## DISCUSSION

The primary aim of the present study was to use the RE-AIM framework to investigate attitudes, beliefs, and behaviour regarding the ASP among delivery agents of injury prevention exercises in Norwegian male professional football teams. A secondary aim was to

1  
2  
3 identify a real-world application of the ASP used in a professional team setting. The main  
4 findings were that all delivery agents were aware of the ASP, all thought the programme can  
5 mitigate the burden of groin problems, all stated to use the ASP in their team the current  
6 season and, almost everyone planned to continue using it in the subsequent season. However,  
7 only 10% used the ASP in accordance with the original ASP protocol.  
8  
9  
10  
11  
12  
13

## 14 **Reach and effectiveness**

16 Having a targeted population to recognize injury risk, to be aware of relevant injury  
17 prevention exercises or programs, and to acknowledge the exercise's or program's ability to  
18 mitigate the injury risk, are vital for successful real-world implementation of effective injury  
19 prevention exercise programs.<sup>9 16-18 19 20</sup> The surveyed delivery agents' belief that players are  
20 at moderate to great risk of groin problems aligns well with epidemiological data.<sup>1 3 21</sup> The  
21 reported awareness level of ASP on the other hand is higher than previously reported for the  
22 CA<sup>12</sup> and the injury prevention exercise programme, FIFA 11+.<sup>22</sup> Discrepancies in awareness  
23 levels between members of the team around the players may be due to, unlike the current  
24 study surveying mostly physiotherapists, comparable studies having primarily surveyed head  
25 coaches which clearly also have other responsibilities besides being updated on injury  
26 prevention exercises and measures.  
27  
28  
29  
30  
31  
32  
33  
34  
35  
36

37 All delivery agents considering the ASP as capable of mitigating the burden of groin  
38 problems aligns with its evidence-based effect, and coincides with previously reported  
39 perceptions of the CA.<sup>12</sup> Moreover, the high ASP awareness level and the positive attitude  
40 towards its efficacy implies that the ASP dissemination strategies have been successful within  
41 this specific population of clinicians.  
42  
43  
44  
45  
46  
47

## 48 **Adoption**

49  
50 All respondents reported using the ASP throughout the season. This is a similar finding to the  
51 adoption rate seen for the CA<sup>12</sup> in male professional football, when only accounting for users  
52 being aware of the exercise. Compared to what has been reported for the Nordic Hamstring  
53 (NH) exercise<sup>23</sup> in male professional football however, the ASP adoption rate is substantially  
54 higher. Interestingly, all respondents stated that the evidence-based efficacy of the ASP was  
55 an important reason for choosing to adopt the programme. Why the ASP seems easier adopted  
56  
57  
58  
59  
60

1  
2  
3 than the NH is undiscovered, as they share the same main characteristics, e.g., able to be  
4 performed pitch-side without equipment and both having evidence-based injury preventative  
5 effect.  
6  
7  
8  
9

## 10 **Implementation**

11  
12  
13 When implementing the programme, the current study shows that delivery agents in  
14 professional football usually modify the ASP to fit their team's training philosophy and  
15 schedule. Similar findings have been demonstrated for the NH<sup>23 24</sup> and the FIFA 11+.<sup>25 26</sup> So  
16 far, no other studies on specific modifications of single-exercise injury prevention  
17 programmes exist.  
18  
19  
20  
21  
22

23 The original ASP protocol<sup>2</sup> prescribes a pre-season strengthening phase containing a detailed  
24 eight-week progression, and an in-season maintenance phase with a continuous number of  
25 repetitions. The intention is first, to provide hip adductor muscle strength gains, and second,  
26 to maintain the increased muscle strength, as reduced hip adductor muscle strength is the only  
27 consistently reported risk factor for groin injury in sports.<sup>27</sup>  
28  
29  
30  
31  
32

33 Compared to the original programme, in total, the delivery agents usually prescribed slightly  
34 more repetitions per session, but divided into two sets, especially during in-season.  
35 Furthermore, they generally conducted fewer sessions per week during pre-season, and the  
36 vast majority did not adopt the eight-week progression recommended for pre-season.  
37  
38  
39  
40  
41

42 We did not investigate why the delivery agents modified the ASP. However, a potential  
43 reason for non-progression during pre-season strengthening phase might be that the delivery  
44 agents consider most professional players to already have gained, and maintained, adequate  
45 hip adductor muscle strength. This would limit the delivery agent's perceived need for players  
46 to commence a progressive strengthening phase. Another reason for the modifications of the  
47 ASP could also be lack of support and acceptance from players and/or coaches. Such support  
48 is considered a key facilitator in the implementation process<sup>9 22</sup> and, motivation to comply  
49 with the original ASP protocol has already been shown to be low among players.<sup>11</sup> A reason  
50 for modifying previous injury prevention strengthening exercises has been attributed to a  
51 possible fear of muscle soreness.<sup>13 28</sup> However, only two respondents reported to have  
52 modified the ASP partly due to such fear, and there is evidence that even the most strenuous  
53  
54  
55  
56  
57  
58  
59  
60



1  
2  
3 level of the ASP barely caused any reported muscle soreness if the number of repetitions was  
4 progressed gradually.<sup>29 30</sup> Consequently, fear of muscle soreness seems to not be an important  
5 barrier to optimal ASP implementation in the real-world setting.  
6  
7  
8  
9

## 10 **Effectiveness of the real-world application of the ASP**

11  
12  
13 An important aspect is that the delivery agents modify the ASP without knowing the impact.  
14 As mentioned, the ASP aims to mitigate groin problems by targeting hip adductor muscle  
15 strength. There is compelling evidence that muscle strength effects are dose dependent,<sup>31</sup>  
16 which also has been suggested for the CA.<sup>32</sup> The reported used pre-season ASP exercise  
17 volume is approximately 640 repetitions during eight weeks, which, interestingly, is a higher  
18 volume than what the evidence-based original ASP protocol prescribes (470 repetitions).<sup>2</sup>  
19 Moreover, it accommodates a suggested minimum of 500-800 repetitions during eight weeks,  
20 when aiming to facilitate meaningful hip adductor muscle strength gains.<sup>32</sup> Since the reported  
21 used weekly in-season ASP exercise volume is almost equal to pre-season, it is reasonable to  
22 assume that players somewhat maintain their hip adductor muscle strength during in-season.  
23  
24  
25  
26  
27  
28  
29  
30

31  
32 Beyond volume considerations, progression seems required to elicit the greatest strength  
33 training gains.<sup>33</sup> As the ASP consists of a bodyweight exercise, weekly increase in the number  
34 of repetitions is the main progression variable. A critical assessment is therefore whether the  
35 reported lack of pre-season progression can reduce the ASP's effectiveness in groin problem  
36 mitigation. Additionally, muscle strength gains also depends on recruitment of high-threshold  
37 motor units, through accumulation of neuromuscular fatigue induced when performing sets to  
38 at least somewhat near neuromuscular failure.<sup>34</sup> Therefore, another critical assessment would  
39 be whether more sets but fewer repetitions per set, as respondents have reported, affect the  
40 ASP's effectiveness.  
41  
42  
43  
44  
45  
46  
47  
48

49  
50 So far, changes in physiological characteristics when performing the ASP, such as effects on  
51 muscle cross-sectional area and architecture, musculotendinous stiffness, and motor unit  
52 recruitment and synchronization,<sup>33</sup> have not been scientifically investigated. Similarly, the  
53 exact dose-response relationship between ASP exercise volume and hip adductor muscle  
54 strength gains, and between ASP exercise volume and groin injury mitigation rates also  
55 remains to be investigated. And lastly, the importance of a progression strengthening phase(s)  
56  
57  
58  
59  
60

1  
2  
3 when aiming to mitigate groin problems, is unknown. Discussions around the most often-used  
4 modification's impact on the ASP's effectiveness are therefore currently theoretical, only.  
5  
6  
7

8  
9 Consequently, we will argue that there is no convincing evidence claiming that the ASP  
10 modifications applied by the delivery agents affect the mitigation of groin problems in male  
11 professional players, compared to the original protocol. Additionally, considerations on ASP  
12 exercise volume and other modifications are subordinated to the fact that no injury prevention  
13 programme will reach its full potential unless it is implemented, adopted, and maintained, by  
14 teams in the real-world setting.<sup>20</sup>  
15  
16  
17  
18  
19  
20

## 21 **Maintenance**

22  
23 To be successful, the final step of any injury prevention exercise implemented in the real-  
24 world setting is that the exercise or the program is maintained over multiple seasons. In our  
25 study, nearly all respondents planned to continue using the ASP in the subsequent season,  
26 representing a considerably higher maintenance level than previously reported.<sup>11</sup> A particular  
27 challenge, however, is that team staff members, including medical staff, are frequently  
28 replaced when managers are replaced, increasing the risk of preventative measures not being  
29 persistently maintained over time.<sup>20</sup> It is yet to be confirmed whether ASP has been  
30 established as part of the teams' or clubs' sports plans or policies on injury prevention  
31 measures.  
32  
33  
34  
35  
36  
37  
38  
39  
40

## 41 **Methodological considerations**

42  
43 The high response rate (91%) is a strength of this study. However, it is uncertain whether our  
44 results can be generalised to other delivery agents and professional football settings outside  
45 Norway. Especially, considering that the literature on ASP and the CA primarily has been  
46 conducted in Norway and Denmark. A further strength of the current study is the pilot testing  
47 of the questionnaire ensuring valuable input to the final questionnaire. A limitation is that the  
48 internal validity of the questionnaire was not systematically explored, which is a prerequisite  
49 to draw firm valid conclusions.<sup>35</sup> The pilot study ensured, however, some degree of internal  
50 validity, by providing adequate understanding and readability of the questionnaire  
51 dimensions. Furthermore, questions related to the "implementation" dimensions, especially  
52 regarding the pre-season application of the ASP, are prone to some degree of recall bias as the  
53  
54  
55  
56  
57  
58  
59  
60

1  
2  
3 survey was conducted towards the end of the competitive season.<sup>36</sup> Therefore, this study  
4 describes how the teams in overall perform the ASP, only, while it is likely that the  
5 programme was individualised depending on players previous injury record and experience  
6 with specific strength exercises. Moreover, this study did not include a question about  
7 delivery agents' perceived involvement in and support from players and coaches, which is  
8 considered a key facilitator to successful implementation in the real-world football setting.<sup>9</sup>  
9  
10  
11  
12  
13  
14

15 Importantly, 79% of the respondents had a defined team staff role as a physiotherapist. This  
16 contrasts with previous studies, where surveyed delivery agents were either strength and  
17 conditioning coaches, head coaches or medical doctors.<sup>22 23 28 37 38</sup> It cannot be ruled out that  
18 some of the discrepancies in attitudes, beliefs and behaviour between the present and previous  
19 studies are due to differences in the participant's formal team staff role and educational  
20 background.  
21  
22  
23  
24  
25  
26  
27  
28

## 29 **PERSPECTIVES**

30  
31 The delivery agents are aware of the ASP, they have adopted it, and they anticipate  
32 maintaining the usage. The implementation of the programme, however, is slightly different  
33 in each team. Further studies are warranted to acquire knowledge about why the ASP is being  
34 modified, and the impact of the modifications on the ASP's effectiveness. As this in previous  
35 studies primarily has been conducted in male adult teams, future studies should include  
36 women's and youth football, too. Also, widespread dissemination of the ASP outside the  
37 Scandinavian countries is needed to achieve reach world-wide. Finally, as recommended,<sup>9</sup>  
38 similar investigations of attitudes, beliefs, and behaviour to the ASP among other stakeholder,  
39 e.g. coaches, club officials and relevant sporting organisations, are needed in order to further  
40 explore the complexity of introducing preventative measures in the real-world professional  
41 setting.  
42  
43  
44  
45  
46  
47  
48  
49  
50  
51  
52  
53

## 54 **CONCLUSION**

55  
56 The present study found that delivery agents of injury prevention exercises in Norwegian  
57 male professional football teams have positive attitudes and beliefs to the ASP, using it  
58  
59  
60

frequently and planning to maintain the usage of it in the subsequent season. Most delivery agents, however, instructed players to complete the ASP with modifications. Therefore, we have identified a real-world application of the ASP protocol used in a professional team setting.

### **Acknowledgements**

The authors would like to thank Ben Clarsen for review of and helpful comments on the manuscript. The authors would also like to thank all the delivery agents for their participation in the study.

### **Competing interests**

None declared

### **Funding**

The Oslo Sports Trauma Research Center has been established at the Norwegian School of Sport Sciences through generous grants from the Royal Norwegian Ministry of Culture, the South-Eastern Norway Regional Health Authority, the International Olympic Committee, the Norwegian Olympic Committee and Confederation of Sport, and Norsk Tipping AS.

### **Author contributions**

All authors planned the study. The data collection and the data analysis were done by JS. All authors have been involved in the drafting and revision of the manuscript, and all have approved the final version.

## **REFERENCES**

1. Waldén M, Hagglund M, Ekstrand J. The epidemiology of groin injury in senior football: a systematic review of prospective studies. *Br J Sports Med* 2015;49(12):792-7. doi: 10.1136/bjsports-2015-094705 [published Online First: 2015/04/03]
2. Harøy J, Clarsen B, Wiger EG, et al. The Adductor Strengthening Programme prevents groin problems among male football players: a cluster-randomised controlled trial. *British Journal of Sports Medicine* 2019;53(3):150-57. doi: 10.1136/bjsports-2017-098937

3. Harøy J, Clarsen B, Thorborg K, et al. Groin Problems in Male Soccer Players Are More Common Than Previously Reported. *Am J Sports Med* 2017;45(6):1304-08. doi: 10.1177/0363546516687539 [published Online First: 2017/03/17]
4. Serner A, Jakobsen MD, Andersen LL, et al. EMG evaluation of hip adduction exercises for soccer players: implications for exercise selection in prevention and treatment of groin injuries. *British Journal of Sports Medicine* 2014;48(14):1108-14. doi: 10.1136/bjsports-2012-091746
5. Engebretsen AH, Myklebust G, Holme I, et al. Prevention of injuries among male soccer players: a prospective, randomized intervention study targeting players with previous injuries or reduced function. *Am J Sports Med* 2008;36(6):1052-60. doi: 10.1177/0363546508314432 [published Online First: 2008/04/09]
6. Hölmich P, Larsen K, Krogsgaard K, et al. Exercise program for prevention of groin pain in football players: a cluster-randomized trial. *Scandinavian journal of medicine & science in sports* 2010;20(6):814-21.
7. O'Brien J, Donaldson A, Finch CF. It will take more than an existing exercise programme to prevent injury. *Br J Sports Med* 2016;50(5):264-5. doi: 10.1136/bjsports-2015-094841 [published Online First: 2015/07/15]
8. Glasgow RE, Vogt TM, Boles SM. Evaluating the public health impact of health promotion interventions: the RE-AIM framework. *Am J Public Health* 1999;89(9):1322-7. doi: 10.2105/ajph.89.9.1322 [published Online First: 1999/09/04]
9. Finch CF, Donaldson A. A sports setting matrix for understanding the implementation context for community sport. *British Journal of Sports Medicine* 2010;44(13):973-78. doi: 10.1136/bjism.2008.056069
10. Fixsen D, Naoom S, Blase K, et al. Implementation Research: A Synthesis of the Literature. *The National Implementation Research Network* 2005;97
11. Harøy J, Wiger EG, Bahr R, et al. Implementation of the Adductor Strengthening Programme: Players primed for adoption but reluctant to maintain - A cross-sectional study. *Scand J Med Sci Sports* 2019;29(8):1092-100. doi: 10.1111/sms.13444 [published Online First: 2019/05/03]
12. Al Attar W, Husain M, Qasem A, et al. The Copenhagen Adduction Exercise is not Applied by the Majority of Professional and Semi-Professional Soccer Players and Coaches. *Annals of Applied Sport Science* 2021:e983. doi: 10.52547/aassjournal.983
13. McCall A, Pruna R, Van der Horst N, et al. Exercise-Based Strategies to Prevent Muscle Injury in Male Elite Footballers: An Expert-Led Delphi Survey of 21 Practitioners Belonging to 18 Teams from the Big-5 European Leagues. *Sports Medicine* 2020;50(9):1667-81. doi: 10.1007/s40279-020-01315-7
14. Von Elm E, Altman DG, Egger M, et al. The Strengthening the Reporting of Observational Studies in Epidemiology (STROBE) statement: guidelines for reporting observational studies. *Bulletin of the World Health Organization* 2007;85:867-72.
15. Canhoto A, Rose S, Spinks N. Management Research – Applying the Principles 2014.
16. Ageberg E, Bunke S, Lucander K, et al. Facilitators to support the implementation of injury prevention training in youth handball: A concept mapping approach. *Scand J Med Sci Sports* 2019;29(2):275-85. doi: 10.1111/sms.13323 [published Online First: 2018/10/20]
17. Finch CF, White P, Twomey D, et al. Implementing an exercise-training programme to prevent lower-limb injuries: considerations for the development of a randomised controlled trial intervention delivery plan. *Br J Sports Med* 2011;45(10):791-6. doi: 10.1136/bjism.2010.081406 [published Online First: 2011/03/12]
18. Richmond SA, Donaldson A, Macpherson A, et al. Facilitators and Barriers to the Implementation of iSPRINT: A Sport Injury Prevention Program in Junior High

- Schools. *Clin J Sport Med* 2020;30(3):231-38. doi: 10.1097/jsm.0000000000000579 [published Online First: 2020/04/29]
19. Forman J, Heisler M, Damschroder LJ, et al. Development and application of the RE-AIM QuEST mixed methods framework for program evaluation. *Prev Med Rep* 2017;6:322-28. doi: 10.1016/j.pmedr.2017.04.002 [published Online First: 2017/04/30]
20. O'Brien J, Häggglund M, Bizzini M. Implementing injury prevention. The rocky road from RCT to real-world injury reduction 2018.
21. Werner J, Häggglund M, Ekstrand J, et al. Hip and groin time-loss injuries decreased slightly but injury burden remained constant in men's professional football: the 15-year prospective UEFA Elite Club Injury Study. *Br J Sports Med* 2019;53(9):539-46. doi: 10.1136/bjsports-2017-097796 [published Online First: 2018/04/25]
22. O'Brien J, Finch CF. Injury prevention exercise programmes in professional youth soccer: understanding the perceptions of programme deliverers. *BMJ Open Sport Exerc Med* 2016;2(1):e000075. doi: 10.1136/bmjsem-2015-000075 [published Online First: 2016/12/03]
23. Al Attar WSA, Soomro N, Sinclair PJ, et al. Implementation of an evidence-based injury prevention program in professional and semi-professional soccer. *International Journal of Sports Science & Coaching* 2018;13(1):113-21. doi: 10.1177/1747954117707482
24. Bahr R, Thorborg K, Ekstrand J. Evidence-based hamstring injury prevention is not adopted by the majority of Champions League or Norwegian Premier League football teams: the Nordic Hamstring survey. *Br J Sports Med* 2015;49(22):1466-71. doi: 10.1136/bjsports-2015-094826 [published Online First: 2015/05/23]
25. O'Brien J, Young W, Finch CF. The use and modification of injury prevention exercises by professional youth soccer teams. *Scand J Med Sci Sports* 2017;27(11):1337-46. doi: 10.1111/sms.12756 [published Online First: 2016/10/08]
26. Shamlaye J, Tomšovský L, Fulcher ML. Attitudes, beliefs and factors influencing football coaches' adherence to the 11+ injury prevention programme. *BMJ Open Sport & Exercise Medicine* 2020;6(1):e000830. doi: 10.1136/bmjsem-2020-000830
27. Whittaker JL, Small C, Maffey L, et al. Risk factors for groin injury in sport: an updated systematic review. *Br J Sports Med* 2015;49(12):803-9. doi: 10.1136/bjsports-2014-094287 [published Online First: 2015/04/03]
28. McCall A, Dupont G, Ekstrand J. Injury prevention strategies, coach compliance and player adherence of 33 of the UEFA Elite Club Injury Study teams: a survey of teams' head medical officers. *British Journal of Sports Medicine* 2016;50(12):725-30. doi: 10.1136/bjsports-2015-095259
29. Harøy J, Thorborg K, Serner A, et al. Including the Copenhagen Adduction Exercise in the FIFA 11+ Provides Missing Eccentric Hip Adduction Strength Effect in Male Soccer Players: A Randomized Controlled Trial. *Am J Sports Med* 2017;45(13):3052-59. doi: 10.1177/0363546517720194 [published Online First: 2017/08/15]
30. Polglass G, Burrows A, Willett M. Impact of a modified progressive Copenhagen adduction exercise programme on hip adduction strength and postexercise muscle soreness in professional footballers. *BMJ Open Sport & Exercise Medicine* 2019;5(1):e000570. doi: 10.1136/bmjsem-2019-000570
31. Ralston GW, Kilgore L, Wyatt FB, et al. The Effect of Weekly Set Volume on Strength Gain: A Meta-Analysis. *Sports Med* 2017;47(12):2585-601. doi: 10.1007/s40279-017-0762-7 [published Online First: 2017/07/30]

- 1  
2  
3 32. Ishøi L, Thorborg K. Copenhagen adduction exercise can increase eccentric strength and  
4 mitigate the risk of groin problems: but how much is enough! *British Journal of Sports*  
5 *Medicine* 2021;bjsports-2020-103564. doi: 10.1136/bjsports-2020-103564  
6  
7 33. Suchomel TJ, Nimphius S, Bellon CR, et al. The Importance of Muscular Strength:  
8 Training Considerations. *Sports Medicine* 2018;48(4):765-85. doi: 10.1007/s40279-  
9 018-0862-z  
10  
11 34. Pescatello LS, Riebe D, Thompson PD. ACSM's guidelines for exercise testing and  
12 prescription: Lippincott Williams & Wilkins 2014.  
13  
14 35. Pripp AH. Validitet. *Tidsskrift for den Norske Lægeforening* 2018;138(13) doi:  
15 10.4045/tidsskr.18.0398  
16  
17 36. Porta M. A Dictionary of Epidemiology: Oxford University Press 2014.  
18  
19 37. McCall A, Carling C, Nedelec M, et al. Risk factors, testing and preventative strategies  
20 for non-contact injuries in professional football: current perceptions and practices of  
21 44 teams from various premier leagues. *Br J Sports Med* 2014;48(18):1352-7. doi:  
22 10.1136/bjsports-2014-093439 [published Online First: 2014/05/20]  
23  
24 38. McCall A, Davison M, Andersen TE, et al. Injury prevention strategies at the FIFA 2014  
25 World Cup: perceptions and practices of the physicians from the 32 participating  
26 national teams. *British Journal of Sports Medicine* 2015;49(9):603-08. doi:  
27 10.1136/bjsports-2015-094747  
28  
29  
30  
31  
32  
33  
34  
35  
36  
37  
38  
39  
40  
41  
42  
43  
44  
45  
46  
47  
48  
49  
50  
51  
52  
53  
54  
55  
56  
57  
58  
59  
60

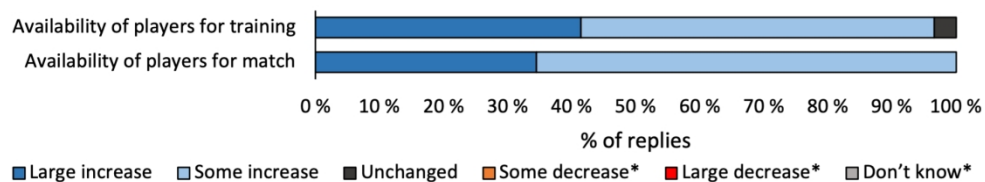

Figure 1: Beliefs regarding whether Adductor Strengthening Programme can influence availability of players in training and match-play. \*No respondent replied some decrease, large decrease or don't know.

382x75mm (130 x 130 DPI)



1  
2  
3  
4  
5  
6  
7  
8  
9  
10  
11  
12  
13  
14  
15  
16  
17  
18  
19  
20  
21  
22  
23  
24  
25  
26  
27  
28  
29  
30  
31  
32  
33  
34  
35  
36  
37  
38  
39  
40  
41  
42  
43  
44  
45  
46  
47  
48  
49  
50  
51  
52  
53  
54  
55  
56  
57  
58  
59  
60

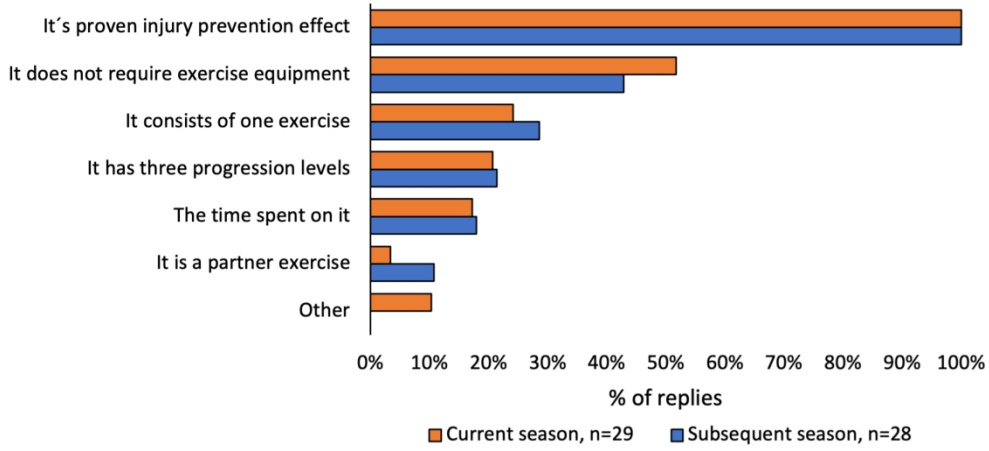

Figure 2: Reasons for choosing to use the Adductor Strengthening Programme this season and reasons for planning using the programme the following season.

372x174mm (130 x 130 DPI)

# Questionnaire

Have you read and approved the informed consent?

Yes

1. What is your age?

18-30 years

31-45 years

46-60 years

More than 60 years

2. At what level does the team where you are employed play?

Eliteserien (Norwegian Premier League)

OBOS-ligaen (Norwegian First Division)

3. What is your role in the team staff where you are employed?

Head coach

Assistant coach

Fitness coach

Physiotherapist

Medical doctor

Other healthcare profession (specify) \_\_\_\_\_

Other position (specify) \_\_\_\_\_

4. What education and / or courses do you have?

It is possible to check several options

UEFA PRO License

UEFA A License

UEFA B License

One-year study in sport science

Bachelor's degree in sport science

Master's degree in sport science

Bachelor's degree in a health profession

Master's degree in a health profession

Other education and/or courses (specify) \_\_\_\_\_

- 1  
2  
3 5. How many years of experience do you have as delivery agent of preventative training  
4 for football players?  
5  
6  0-4 years  
7  5-9 years  
8  10-14 years  
9  15-20 years  
10  More than 20 years  
11  
12  
13

14 **Further, you will get two questions that deal with groin problems.**

15 By groin problems is meant any pain, ache, stiffness, clicking/catching or other complaints  
16 related to the groin, or reduced training participation, training volume or performance due to  
17 groin problems.  
18  
19

- 20  
21 6. How much risk do you think football players have getting groin problems?  
22  Great risk  
23  Moderate risk  
24  Small risk  
25  No risk  
26  Don't know  
27  
28  
29  
30 7. How important do you think it is to perform preventative training to mitigate groin  
31 problems?  
32  Greatly important  
33  Moderately important  
34  A little important  
35  Not important  
36  Don't know  
37  
38  
39  
40  
41 8. Were you aware of the "Adductor Strengthening Programme" and/or the "Copenhagen  
42 Adduction" exercise prior to reading the information in the introduction to this  
43 questionnaire?  
44  Yes  
45  No  
46  Don't know  
47  
48  
49  
50  
51  
52  
53  
54  
55  
56  
57  
58  
59  
60

- 1  
2  
3 9. Where did you get information about the “Adductor Strengthening Programme”  
4 and/or the "Copenhagen Adduction Exercise"?

5 It is possible to check several options  
6

- 7  “Skadefri” website  
8  “Skadefri” application  
9  Article in the British Journal of Sports Medicine  
10  Conference/course  
11  Infographics  
12  Social media (Twitter, Facebook, Instagram etc.)  
13  Other (specify) \_\_\_\_\_  
14  Don’t know  
15  
16  
17  
18

- 19 10. Check if you are aware that you can find information about the “Adductor  
20 Strengthening Programme” and/or the «Copenhagen Adduction Exercise» in these  
21 relevant places:  
22

23 It is possible to check several options  
24

- 25  “Skadefri” website  
26  “Skadefri” application  
27  Article in the British Journal of Sports Medicine  
28  Infographics  
29  Social media (Twitter, Facebook, Instagram etc.)  
30  Other (specify) \_\_\_\_\_  
31  
32  
33

34 **Further, you will get two questions that deal with groin problems.**

35 By groin problems is meant any pain, ache, stiffness, clicking/catching or other complaints  
36 related to the groin, or reduced training participation, training volume or performance due to  
37 groin problems.  
38  
39

- 40 11. Do you think that the “Adductor Strengthening Programme” can influence the burden  
41 of groin problems?  
42

- 43  Yes, the program can greatly mitigate the burden  
44  Yes, the program can moderately mitigate the burden  
45  No, the program cannot have an effect on the burden  
46  Yes, the program can moderately aggravate the burden  
47  Yes, the program can greatly aggravate the burden  
48  Don’t know  
49  
50  
51  
52  
53  
54  
55  
56  
57  
58  
59  
60

1  
2  
3 12. Do you think that the “Adductor Strengthening Programme” can influence football  
4 performance?  
5

- 6  Yes, the program can greatly increase performance  
7  Yes, the program can moderately increase performance  
8  No, the program cannot have an effect on performance  
9  Yes, the program can moderately decrease performance  
10  Yes, the program can greatly decrease performance  
11  Don't know  
12  
13  
14

15 **How do you think the following of the players' physical skills may be affected by doing**  
16 **the “Adductor Strengthening Programme”?**  
17  
18

19 13. Linear acceleration?  
20

- 21  Large increase  
22  Some increase  
23  Unchanged  
24  Some decrease  
25  Large decrease  
26  Don't know  
27  
28  
29

30 14. Top speed?  
31

- 32  Large increase  
33  Some increase  
34  Unchanged  
35  Some decrease  
36  Large decrease  
37  Don't know  
38  
39  
40

41 15. Change of direction?  
42

- 43  Large increase  
44  Some increase  
45  Unchanged  
46  Some decrease  
47  Large decrease  
48  Don't know  
49  
50  
51  
52  
53  
54  
55  
56  
57  
58  
59  
60

1  
2  
3 16. Vertical jump ability?

- 4
- 
- Large increase
- 
- 5
- 
- Some increase
- 
- 6
- 
- Unchanged
- 
- 7
- 
- Some decrease
- 
- 8
- 
- Large decrease
- 
- 9
- 
- Don't know
- 
- 10
- 
- 11
- 
- 12
- 
- 13

## 14 17. Duelling power?

- 15
- 
- Large increase
- 
- 16
- 
- Some increase
- 
- 17
- 
- Unchanged
- 
- 18
- 
- Some decrease
- 
- 19
- 
- Large decrease
- 
- 20
- 
- Don't know
- 
- 21
- 
- 22
- 
- 23
- 
- 24

25 **How do you think other factors can may be affected by doing the “Adductor**  
26 **Strengthening Programme”:**  
27  
28

## 29 18. Availability of players for match?

- 30
- 
- Large increase
- 
- 31
- 
- Some increase
- 
- 32
- 
- Unchanged
- 
- 33
- 
- Some decrease
- 
- 34
- 
- Large decrease
- 
- 35
- 
- Don't know
- 
- 36
- 
- 37
- 
- 38
- 
- 39

## 40 19. Availability of players for training?

- 41
- 
- Large increase
- 
- 42
- 
- Some increase
- 
- 43
- 
- Unchanged
- 
- 44
- 
- Some decrease
- 
- 45
- 
- Large decrease
- 
- 46
- 
- Don't know
- 
- 47
- 
- 48
- 
- 49
- 
- 50

## 51 20. Chance of winning a match?

- 52
- 
- Large increase
- 
- 53
- 
- Some increase
- 
- 54
- 
- Unchanged
- 
- 55
- 
- Some decrease
- 
- 56
- 
- Large decrease
- 
- 57
- 
- Don't know
- 
- 58
- 
- 59
- 
- 60

1  
2  
3 21. What other positive characteristics / achievements / consequences do you think the  
4 “Adductor Strengthening Programme” can provide? Describe in your own words.  
5

6  
7  
8  
9  
10  
11  
12

13  
14 22. What other negative characteristics / achievements / consequences do you think the  
15 “Adductor Strengthening Programme” can provide? Describe in your own words.  
16

17  
18  
19  
20  
21  
22

23  
24 23. Do you use the “Adductor Strengthening Programme” in your team?  
25

- 26  Yes, as described in the protocol  
27  Yes, as modified version  
28  No  
29  Don't know  
30  
31

32  
33 24. How do you use the “Adductor Strengthening Programme” in your training schedule?  
34

- 35  As part of organised football training  
36  As part of organised strength training  
37  As an independent preparation in the locker room or strength room before  
38 training  
39  As guided preparation in the locker room or strength room before training  
40  As independent training in a separate strength training session  
41  Other way (specify) \_\_\_\_\_  
42  
43  
44

45 **When using the “Adductor Strengthening Programme” in season (under normal**  
46 **circumstances, not influenced by covid-19):**  
47

48  
49 25. How often did the players perform the program?  
50

- 51  More than once a week  
52  Once a week  
53  Once every two weeks  
54  We carried out the program, but less than once every two weeks  
55  
56

57 26. How many sets did the players perform?  
58

- 59  More than 2 sets per side  
60  2 sets per side

- 1  
2  
3  1 set per side  
4  
5

6 27. How many repetitions did the players perform in each set?

- 7  More than 15 repetitions per side  
8  12-15 repetitions per side  
9  8-11 repetitions per side  
10  4-7 repetitions per side  
11  Less than 4 repetitions per side  
12  
13  
14

15 **When using the “Adductor Strengthening Programme” in preseason (under normal**  
16 **circumstances, not influenced by covid-19):**  
17

18  
19 28. How often did the players perform the program?

- 20  More than 3 times a week  
21  3 times a week  
22  Twice a week  
23  Once a week  
24  We carried out the program, but less than once a week  
25  
26  
27  
28

29 29. How many sets did the players perform?

- 30  More than 2 sets per side  
31  2 sets per side  
32  1 set per side  
33  
34  
35

36 30. How many repetitions did the players perform in each set?

- 37  More than 15 repetitions per set each week  
38  12-15 repetitions per set each week  
39  7-10 repetitions per set each week  
40  3-5 repetitions per set each week  
41  3-15 repetitions per set, weekly progressive (as in protocol)  
42  3-15 repetitions per set, weekly progressive (as own modification)  
43  
44  
45  
46

47 31. What has been important for you in choosing to use the “Adductor Strengthening  
48 Programme”?

49 It is possible to check several options

- 50  The program's injury prevention effect  
51  The time spent on the program  
52  The programme consists of one exercise  
53  The programme consists of three progression levels  
54  The programme is a partner exercise  
55  The programme does not require exercise equipment  
56  Other (specify) \_\_\_\_\_  
57  
58  
59  
60



1  
2  
3  
4  
5  
6  
7  
8  
9  
10  
11  
12  
13  
14  
15  
16  
17  
18  
19  
20  
21  
22  
23  
24  
25  
26  
27  
28  
29  
30  
31  
32  
33  
34  
35  
36  
37  
38  
39  
40  
41  
42  
43  
44  
45  
46  
47  
48  
49  
50  
51  
52  
53  
54  
55  
56  
57  
58  
59  
60

32. Do you use other preventative training in addition to the “Adductor Strengthening Programme”, with the intention to mitigate the burden of groin problems?

- Yes
- No
- Don't know

33. What training do you use in addition to, or instead of, the “Adductor Strengthening Programme” to mitigate the burden of groin problems? Describe in your own words as detailed as possible which exercise (s), how they are performed, dosage (series, repetitions, intensity), and anything else you consider relevant.

34. Why did you choose to do what is described in the previous answer, and who participated in the decision? Describe in your own words.

35. Do you anticipate using the “Adductor Strengthening Programme” in your team the following season?

- Yes, as described in the protocol
- Yes, as an own modification
- No
- Don't know

36. What is the reason why you anticipate using the “Adductor Strengthening Programme” in your team in the following season?

It is possible to check several options

- The program's injury prevention effect
- The time spent on the program
- The program consists of one exercise
- The program consists of three progression levels
- The program can be performed as a partner exercise
- The program does not require exercise equipment
- Other (specify) \_\_\_\_\_

1  
2  
3 37. What is the reason why you do not anticipate using the “Adductor Strengthening  
4 Programme” in your team in the following season?

5  
6 It is possible to check several options

- 7  The program's lack of injury prevention effect  
8  The time spent on the program  
9  The program consists of only one exercise  
10  The program consists of only three levels of difficulty  
11  The program can be performed as a partner exercise  
12  The program does not require exercise equipment  
13  Other (specify) \_\_\_\_\_  
14  
15  
16  
17

18 38. Do you have any suggestions for changes to the “Adductor Strengthening  
19 Programme” that may make it more relevant to use the program? Describe in your  
20 own words.  
21

22  
23  
24  
25  
26  
27  
28  
29  
30  
31  
32  
33  
34  
35  
36  
37  
38  
39  
40  
41  
42  
43  
44  
45  
46  
47  
48  
49  
50  
51  
52  
53  
54  
55  
56  
57  
58  
59  
60

STROBE Statement—Checklist of items that should be included in reports of *cross-sectional studies*

|                              | Item No | Recommendation                                                                                                                                                                                               | Page No |
|------------------------------|---------|--------------------------------------------------------------------------------------------------------------------------------------------------------------------------------------------------------------|---------|
| <b>Title and abstract</b>    | 1       | (a) Indicate the study's design with a commonly used term in the title or the abstract                                                                                                                       | 2       |
|                              |         | (b) Provide in the abstract an informative and balanced summary of what was done and what was found                                                                                                          | 2       |
| <b>Introduction</b>          |         |                                                                                                                                                                                                              |         |
| Background/rationale         | 2       | Explain the scientific background and rationale for the investigation being reported                                                                                                                         | 4       |
| Objectives                   | 3       | State specific objectives, including any prespecified hypotheses                                                                                                                                             | 5       |
| <b>Methods</b>               |         |                                                                                                                                                                                                              |         |
| Study design                 | 4       | Present key elements of study design early in the paper                                                                                                                                                      | 5       |
| Setting                      | 5       | Describe the setting, locations, and relevant dates, including periods of recruitment, exposure, follow-up, and data collection                                                                              | 5       |
| Participants                 | 6       | (a) Give the eligibility criteria, and the sources and methods of selection of participants                                                                                                                  | 5       |
| Variables                    | 7       | Clearly define all outcomes, exposures, predictors, potential confounders, and effect modifiers. Give diagnostic criteria, if applicable                                                                     | -       |
| Data sources/<br>measurement | 8*      | For each variable of interest, give sources of data and details of methods of assessment (measurement). Describe comparability of assessment methods if there is more than one group                         | -       |
| Bias                         | 9       | Describe any efforts to address potential sources of bias                                                                                                                                                    | -       |
| Study size                   | 10      | Explain how the study size was arrived at                                                                                                                                                                    | 5-6     |
| Quantitative variables       | 11      | Explain how quantitative variables were handled in the analyses. If applicable, describe which groupings were chosen and why                                                                                 | 6       |
| Statistical methods          | 12      | (a) Describe all statistical methods, including those used to control for confounding                                                                                                                        | 6       |
|                              |         | (b) Describe any methods used to examine subgroups and interactions                                                                                                                                          | -       |
|                              |         | (c) Explain how missing data were addressed                                                                                                                                                                  | -       |
|                              |         | (d) If applicable, describe analytical methods taking account of sampling strategy                                                                                                                           | -       |
|                              |         | (e) Describe any sensitivity analyses                                                                                                                                                                        | -       |
| <b>Results</b>               |         |                                                                                                                                                                                                              |         |
| Participants                 | 13*     | (a) Report numbers of individuals at each stage of study—eg numbers potentially eligible, examined for eligibility, confirmed eligible, included in the study, completing follow-up, and analysed            | 5-6     |
|                              |         | (b) Give reasons for non-participation at each stage                                                                                                                                                         | 6       |
|                              |         | (c) Consider use of a flow diagram                                                                                                                                                                           | -       |
| Descriptive data             | 14*     | (a) Give characteristics of study participants (eg demographic, clinical, social) and information on exposures and potential confounders                                                                     | 6       |
|                              |         | (b) Indicate number of participants with missing data for each variable of interest                                                                                                                          | -       |
| Outcome data                 | 15*     | Report numbers of outcome events or summary measures                                                                                                                                                         | 6-8     |
| Main results                 | 16      | (a) Give unadjusted estimates and, if applicable, confounder-adjusted estimates and their precision (eg, 95% confidence interval). Make clear which confounders were adjusted for and why they were included | Ok      |

|                          |    |                                                                                                                                                                            |    |
|--------------------------|----|----------------------------------------------------------------------------------------------------------------------------------------------------------------------------|----|
|                          |    | (b) Report category boundaries when continuous variables were categorized                                                                                                  | -  |
|                          |    | (c) If relevant, consider translating estimates of relative risk into absolute risk for a meaningful time period                                                           | -  |
| Other analyses           | 17 | Report other analyses done—eg analyses of subgroups and interactions, and sensitivity analyses                                                                             | -  |
| <b>Discussion</b>        |    |                                                                                                                                                                            |    |
| Key results              | 18 | Summarise key results with reference to study objectives                                                                                                                   | 8  |
| Limitations              | 19 | Discuss limitations of the study, taking into account sources of potential bias or imprecision. Discuss both direction and magnitude of any potential bias                 | 13 |
| Interpretation           | 20 | Give a cautious overall interpretation of results considering objectives, limitations, multiplicity of analyses, results from similar studies, and other relevant evidence | 13 |
| Generalisability         | 21 | Discuss the generalisability (external validity) of the study results                                                                                                      | 13 |
| <b>Other information</b> |    |                                                                                                                                                                            |    |
| Funding                  | 22 | Give the source of funding and the role of the funders for the present study and, if applicable, for the original study on which the present article is based              | 14 |

\*Give information separately for exposed and unexposed groups.

**Note:** An Explanation and Elaboration article discusses each checklist item and gives methodological background and published examples of transparent reporting. The STROBE checklist is best used in conjunction with this article (freely available on the Web sites of PLoS Medicine at <http://www.plosmedicine.org/>, Annals of Internal Medicine at <http://www.annals.org/>, and Epidemiology at <http://www.epidem.com/>). Information on the STROBE Initiative is available at [www.strobe-statement.org](http://www.strobe-statement.org).

# BMJ Open

## The Adductor Strengthening Programme is successfully adopted but frequently modified in Norwegian male professional football teams: a cross sectional study

|                                 |                                                                                                                                                                                                                                                                                                                                                                                                     |
|---------------------------------|-----------------------------------------------------------------------------------------------------------------------------------------------------------------------------------------------------------------------------------------------------------------------------------------------------------------------------------------------------------------------------------------------------|
| Journal:                        | <i>BMJ Open</i>                                                                                                                                                                                                                                                                                                                                                                                     |
| Manuscript ID                   | bmjopen-2021-060611.R2                                                                                                                                                                                                                                                                                                                                                                              |
| Article Type:                   | Original research                                                                                                                                                                                                                                                                                                                                                                                   |
| Date Submitted by the Author:   | 21-Jun-2022                                                                                                                                                                                                                                                                                                                                                                                         |
| Complete List of Authors:       | Stensø, Joakim; Norwegian School of Sports Sciences, Department of Sports Medicine<br>Andersen, Thor Einar; Oslo Sports Trauma Research Center, Norwegian School of Sports Sciences, Department of Sports Medicine; Norwegian FA Medical Clinic<br>Harøy, Joar; Oslo Sports Trauma Research Center, Norwegian School of Sports Sciences, Department of Sports Medicine; Norwegian FA Medical Clinic |
| <b>Primary Subject Heading</b>: | Sports and exercise medicine                                                                                                                                                                                                                                                                                                                                                                        |
| Secondary Subject Heading:      | Sports and exercise medicine                                                                                                                                                                                                                                                                                                                                                                        |
| Keywords:                       | SPORTS MEDICINE, PREVENTIVE MEDICINE, REHABILITATION MEDICINE                                                                                                                                                                                                                                                                                                                                       |
|                                 |                                                                                                                                                                                                                                                                                                                                                                                                     |

SCHOLARONE™  
Manuscripts



I, the Submitting Author has the right to grant and does grant on behalf of all authors of the Work (as defined in the below author licence), an exclusive licence and/or a non-exclusive licence for contributions from authors who are: i) UK Crown employees; ii) where BMJ has agreed a CC-BY licence shall apply, and/or iii) in accordance with the terms applicable for US Federal Government officers or employees acting as part of their official duties; on a worldwide, perpetual, irrevocable, royalty-free basis to BMJ Publishing Group Ltd ("BMJ") its licensees and where the relevant Journal is co-owned by BMJ to the co-owners of the Journal, to publish the Work in this journal and any other BMJ products and to exploit all rights, as set out in our [licence](#).

The Submitting Author accepts and understands that any supply made under these terms is made by BMJ to the Submitting Author unless you are acting as an employee on behalf of your employer or a postgraduate student of an affiliated institution which is paying any applicable article publishing charge ("APC") for Open Access articles. Where the Submitting Author wishes to make the Work available on an Open Access basis (and intends to pay the relevant APC), the terms of reuse of such Open Access shall be governed by a Creative Commons licence – details of these licences and which [Creative Commons](#) licence will apply to this Work are set out in our licence referred to above.

Other than as permitted in any relevant BMJ Author's Self Archiving Policies, I confirm this Work has not been accepted for publication elsewhere, is not being considered for publication elsewhere and does not duplicate material already published. I confirm all authors consent to publication of this Work and authorise the granting of this licence.

1  
2  
3 **The Adductor Strengthening Programme is successfully adopted**  
4 **but frequently modified in Norwegian male professional football**  
5 **teams: a cross sectional study**  
6  
7  
8  
9

10  
11  
12  
13  
14  
15  
16  
17 Joakim Stensø<sup>1</sup>, Thor Einar Andersen<sup>1,2</sup>, Joar Harøy<sup>1,2</sup>  
18

19  
20  
21 1 Oslo Sports Trauma Research Center, Department of Sports Medicine, Norwegian School  
22 of Sport Sciences, Oslo, Norway  
23

24 2 The Norwegian FA Medical Clinic, Oslo, Norway  
25

26  
27  
28 Corresponding author: Joakim Stensø

29 Postal address: Sørlogata 10 C, 0577 Oslo, Norway

30  
31 Email: [joakim.s.stenso@hotmail.no](mailto:joakim.s.stenso@hotmail.no)  
32

33  
34  
35 Word count: 3302  
36  
37  
38  
39  
40  
41  
42  
43  
44  
45  
46  
47  
48  
49  
50  
51  
52  
53  
54  
55  
56  
57  
58  
59  
60

## ABSTRACT

**Objectives:** Groin injuries represent a substantial problem in male football, with the Adductor Strengthening Programme (ASP) being the only exercise programme demonstrated to significantly reduce the risk of groin problems. We aimed first, to use the RE-AIM framework to investigate attitudes, beliefs, and behaviour to the ASP among injury prevention delivery agents (i.e., staff with main responsibility for implementing and conducting injury prevention exercises). Secondly, we aimed to identify a real-world application of the ASP protocol used in a professional team setting.

**Methods:** A descriptive cross-sectional survey of 32 injury prevention delivery agents in Norwegian male professional football teams. The questionnaire was designed to cover all five dimensions of the Reach Adoption Effectiveness Implementation Maintenance (RE-AIM) framework and were pilot tested prior to the survey.

**Results:** Twenty-nine (91%) participants responded. All (100%) respondents were aware of the ASP and its potential to mitigate the burden of groin problems. The two most stated reasons for using the ASP were its injury preventive effect and that it does not require equipment. The ASP was adopted by all (100%) delivery agents, but only 10% used it in accordance with the original protocol. The main modifications were that the players in 72% of the teams were instructed to perform a non-progressive number of repetitions during pre-season, and in 86% of the teams instructed to perform more sets, but fewer repetitions per set, during in-season. In total, 97% of the delivery agents planned to continue using the ASP.

**Conclusion:** The delivery agents have positive attitudes and beliefs to the ASP, but they frequently modify it. We identified and reported a real-world application of the ASP protocol.

**Key words:** Football, groin injury, injury prevention, Adductor Strengthening Programme, Copenhagen Adduction, RE-AIM, implementation



### Strengths and limitations of this study

- The questionnaire was pilot tested by delivery agents with relevant experience.
- Thorough data collection process leading to a high response rate.
- The internal validity of the questionnaire was not systematically explored.
- Some of the questionnaire's questions are prone to recall bias as the survey was conducted towards the end of the competitive season.

### What is already known?

- The Adductor Strengthening Programme (ASP) prevents groin problems in football, and is suggested implemented in football training
- Many injury prevention programmes and exercises are not successfully implemented in a real-world setting, limiting their effectiveness
- Knowledge of attitudes, beliefs, and behaviour regarding injury prevention exercises is key for successful implementation

### What are the new findings?

- Team staff responsible for injury prevention exercises in Norwegian male professional football teams are aware of and familiar with the ASP and it's preventative effect
- The programme is widely adopted by all teams
- We have identified a real-world application of the programme used in a professional team setting

## INTRODUCTION

Groin problems represent a substantial problem in football. They account for 4-19% and 2-11% of all time-loss injuries in male and female football, respectively[1]. Moreover, the average weekly proportion of male players with any groin problem causing pain and/or reduced performance is 21% in a full competitive season[2] and, 29% in periods with match congestion[3].

In a clinical trial, the Adductor Strengthening Programme (ASP) showed a significant 41% reduction in risk of groin problems in male semi-professional players performing the programme during one full season[2]. Consequently, dissemination and widespread implementation of the ASP in football training seems beneficial[2, 4]. The ASP is based on a single-exercise, the Copenhagen Adduction (CA) exercise[4], structured with three progression levels and a protocol with a pre-season and in-season exercise prescription. In the clinical trial, players completed on average about 70% of the recommended exercise prescription, demonstrating a considerably higher compliance than previous groin injury prevention programmes[5, 6]. The high compliance is an important strength of the ASP, as only injury prevention programmes that are successfully implemented (i.e. widely adopted, complied with and maintained over time) will reach effectiveness outside controlled clinical trials[7].

Gaining knowledge on attitudes, beliefs, and behaviour to injury prevention exercises are important when evaluating their implementation in the real-world setting[7]. For this purpose, integrating the Reach Effectiveness Adoption Implementation Maintenance (RE-AIM) framework[8, 9] is recommended, ideally evaluated across all levels of the sport setting hierarchy[9]. In brief, the framework evaluates the proportion of a targeted population that is aware of a given intervention (Reach), the interventions positive outcomes (Effectiveness), the proportions that has adopted the intervention (Adoption) and implemented it as intended (Implementation), and the extent to which it is sustained (Maintenance)[8, 9]. Note that the specific RE-AIM implementation dimension refers to the extent to which an exercise or a programme is used as intended in the real-world setting[9]. The general term implementation

1  
2  
3 also used in this article, however, refers to all initiatives applied to put an exercise or a  
4 programme into practice[10].  
5  
6  
7

8 Attitudes and beliefs towards the ASP is previously investigated among players participating  
9 in the clinical ASP trial[11]. The study revealed that only 31% of the players anticipated to  
10 continue using the ASP in accordance with the original protocol[11]. Also, a recent study on  
11 the CA among coaches in international male professional teams reported that 72% were aware  
12 of the exercise, while 94% of those had adopted it[12]. These findings are consistent with  
13 previous research emphasising that evidence-based injury prevention exercises can be  
14 challenging to apply in the real-world settings[13]. To enhance knowledge, we believed it was  
15 important to conduct a survey among team staff, specifically among those having the main  
16 responsibility for implementing and conducting injury prevention exercises (hereafter referred  
17 to as “delivery agents”).  
18  
19  
20  
21  
22  
23  
24  
25  
26

27 Therefore, the primary aim of this study was to use the RE-AIM framework to investigate  
28 attitudes, beliefs, and behaviour to the ASP among delivery agents of injury prevention  
29 exercises in Norwegian male professional football teams. The secondary aim was to identify a  
30 real-world application of the ASP protocol used in a professional team setting, which to our  
31 knowledge, previously has not been conducted for any single-exercise injury prevention  
32 programme.  
33  
34  
35  
36  
37  
38  
39  
40

## 41 **METHODS**

### 42 **Study design and participants**

43  
44  
45 This was a cross-sectional study conducted in September and October 2020. Participants were  
46 the primary delivery agent in each team in the top two divisions of Norwegian male  
47 professional football (n=32): Eliteserien (n=16) and OBOS-ligaen (n=16). The study was  
48 approved by the ethics board at the Norwegian School of Sport Sciences (134-130820) and by  
49 the Norwegian Centre for Research Data (NSD 2020/837286), and all respondents gave  
50 informed consent to participate. The study is described according to the STROBE statement  
51 checklist for cross-sectional studies[14].  
52  
53  
54  
55  
56  
57  
58  
59  
60

## Survey

A new questionnaire designed to cover all dimensions of the RE-AIM[8] framework was developed, based on previous questionnaires used in studies investigating implementation of preventative training in elite and sub-elite sport's settings[11, 15]. The final version consisted of 38 questions, primarily closed-ended. The questionnaire was developed and delivered in Norwegian, however, a translated English version is provided as an appendix to this paper (Supplementary file 1).

## Data collection

We collected contact information to the delivery agents either through our network of contacts or by contacting the team's directly. All delivery agents received an email with detailed information about the study and a link with access to an online survey software (SurveyXact, Rambøll Management Consulting AS, Oslo). We distributed the questionnaire during an international break in September 2020. Weekly reminders were sent to non-responders by email for four weeks, and after five weeks, non-responders were contacted by telephone.

## Analysis

We performed statistical analysis using SPSS statistical software (SPSS V24, IBM Corporation, Armonk, NY). Data consisted of categorical nominal variables, presented as proportions, including for the specific RE-AIM dimensions. Open-ended text responses were analysed with a quantitative content analysis[16], using a structured code form counting frequencies of variables mentioned. The code form was also used to categorise whether the participants had a positive, negative, or neutral attitude.

## Patient and public involvement

Three experienced delivery agents (two physiotherapists and one football coach) not involved as participants did pilot test the questionnaire and gave feedback on its understanding and readability. Patients and/or the public were not involved in any other part of the conduct, or reporting, or dissemination plans of this research.

## RESULTS

### Participant characteristics

Twenty-nine (91%) of the 32 delivery agents participated in the survey (14 from Eliteserien and 15 from OBOS-ligaen). The non-responders gave no specific reasons for not participating. Twenty-three (79%) of the respondents were physiotherapists, five (17%) were strength and conditioning coaches and one (3%) was a naprapath. Respondents' experience as delivery agents in football is shown in Table 1.

**Table 1:** Years of experience as delivery agents of injury prevention exercises in football

| Years of experience as delivery agent | n (%)   |
|---------------------------------------|---------|
| 0-4 years                             | 5 (17)  |
| 5-9 years                             | 13 (45) |
| 10-14 years                           | 7 (24)  |
| 15-19 years                           | 3 (10)  |
| ≥ 20 years                            | 1 (3)   |

### Attitudes to groin injury risk and importance of injury mitigation

Football players risk of getting a groin problem was assumed to be high or moderate by 19 (66%) and 9 (31%) delivery agents, respectively, while one respondent considered the risk to be low. All (100%) respondents thought prevention exercises to mitigate groin problems was important, replied by 27 (93%) as highly important and by 2 (7%) as moderately important.

### Reach and effectiveness of the ASP

All (100%) respondents were aware of either one or both of ASP and the CA. All (100%) delivery agents thought the ASP has potential to successfully mitigate the burden of groin problems, with 11 (38%) perceiving the groin problem mitigation as large and 18 (62%) perceiving it as moderate. Beliefs about the ASP's effect on player availability can be viewed in Figure 1.

[INSERT FIGURE 1 WITH LEGEND HERE]

## Adoption and implementation of the ASP

All (100%) delivery agents had adopted the ASP in their team the current season, of which three (10%) replied that their usage was in accordance with the original ASP protocol. How the teams reported the usage of the ASP in terms of exercise frequency, sets and repetitions, is shown in Table 2 and 3 for pre-season and in-season, respectively.

**Table 2: Overview of reported training volume of the Adductor Strengthening Programme (ASP) during pre-season\***

| <b>“How often were the players instructed to perform the ASP?”</b>            | <b>n (%)</b> |
|-------------------------------------------------------------------------------|--------------|
| More than 3 times a week                                                      | 2 (7)        |
| 3 times a week                                                                | 4 (14)       |
| Twice a week                                                                  | 16 (55)      |
| Once a week                                                                   | 5 (17)       |
| We carried out the program, but less than once a week                         | 2 (7)        |
| <b>“How many sets were the players instructed to perform per side?”</b>       | <b>n (%)</b> |
| More than 2 sets per side                                                     | 8 (28)       |
| 2 sets per side                                                               | 17 (59)      |
| 1 set per side                                                                | 4 (14)       |
| <b>“How many repetitions were the players instructed to perform per set?”</b> | <b>n (%)</b> |
| More than 15 repetitions each week                                            | 1 (3)        |
| 12-15 repetitions each week                                                   | 3 (10)       |
| 7-10 repetitions each week                                                    | 16 (55)      |
| 3-5 repetitions each week                                                     | 1 (3)        |
| 3-15 repetitions, weekly progressive as in protocol                           | 3 (10)       |
| 3-15 repetitions, weekly progressive as own modification                      | 5 (17)       |

\*Specified as under normal circumstances, e.g., not influenced by Covid-19

**Table 3: Overview of reported training volume of the Adductor Strengthening Programme (ASP) during in-season\***

| <b>“How often were the players instructed to perform the ASP?”</b>      | <b>n (%)</b> |
|-------------------------------------------------------------------------|--------------|
| More than once a week                                                   | 9 (31)       |
| Once a week                                                             | 16 (55)      |
| Once every two weeks                                                    | 2 (7)        |
| We carried out the program, but less than once every two weeks          | 2 (7)        |
| <b>“How many sets were the players instructed to perform per side?”</b> | <b>n (%)</b> |

|                                                                               |              |
|-------------------------------------------------------------------------------|--------------|
| More than 2 sets per side                                                     | 7 (24)       |
| 2 sets per side                                                               | 18 (62)      |
| 1 set per side                                                                | 4 (14)       |
| <b>“How many repetitions were the players instructed to perform per set?”</b> | <b>n (%)</b> |
| More than 15 repetitions                                                      | 1 (3)        |
| 12-15 repetitions                                                             | 6 (21)       |
| 8-11 repetitions                                                              | 14 (48)      |
| 4-7 repetitions                                                               | 8 (28)       |

\*Specified as under normal circumstances, e.g., not influenced by Covid-19

The most often-used ASP modifications are summed up in Table 4, which is the identified real-world application of the ASP protocol used in a professional team setting.

**Table 4:** Adductor Strengthening Programme real-world application in Norwegian male professional football teams

| <b>Adductor Strengthening Programme – real-world application</b> |                   |               |                      |
|------------------------------------------------------------------|-------------------|---------------|----------------------|
| Week                                                             | Sessions per week | Sets per side | Repetitions per side |
| Pre-season – week 1-8                                            | 2                 | 2             | 7-10                 |
| In-season – all weeks                                            | 1                 | 2             | 8-11                 |

### Maintenance of the ASP

Twenty-eight (97%) delivery agents planned to continue using the ASP in the subsequent season, of which 20 (71%) planned to use a modified protocol.

### Facilitators and barriers to implementation of the ASP

The most often stated reasons to use the ASP were first, the documented preventive effect of the ASP (100%, both in current and subsequent season) and second, that no additional equipment is needed (52% in current and 43% in subsequent season) (Figure 2). On an open-ended non-mandatory question, four respondents (27%) defined an indirect performance enhancing effect as an additional positive effect of ASP. Five (31%) respondents described the ASP progression levels as being too demanding, while four (25%) thought it was likely to cause muscle soreness. Two of these four respondents indicated soreness was the reason for modifying the original ASP protocol.

1  
2  
3 **[INSERT FIGURE 2 WITH LEGEND HERE]**  
4  
5  
6  
7

## 8 **DISCUSSION**

9

10  
11 The primary aim of the present study was to use the RE-AIM framework to investigate  
12 attitudes, beliefs, and behaviour regarding the ASP among delivery agents of injury  
13 prevention exercises in Norwegian male professional football teams. A secondary aim was to  
14 identify a real-world application of the ASP used in a professional team setting. The main  
15 findings were that all delivery agents were aware of the ASP, all thought the programme can  
16 mitigate the burden of groin problems, all stated to use the ASP in their team the current  
17 season and, almost everyone planned to continue using it in the subsequent season. However,  
18 only 10% used the ASP in accordance with the original ASP protocol.  
19  
20  
21  
22  
23  
24

### 25 **Reach and effectiveness**

26

27  
28 Having a targeted population to recognize injury risk, to be aware of relevant injury  
29 prevention exercises or programs, and to acknowledge the exercise's or program's ability to  
30 mitigate the injury risk, are vital for successful real-world implementation of effective injury  
31 prevention exercise programs[9, 17-20]. The surveyed delivery agents' belief that players are  
32 at moderate to great risk of groin problems aligns well with epidemiological data[1, 3, 21].  
33 The reported awareness level of ASP on the other hand is higher than previously reported for  
34 the CA[12] and the injury prevention exercise programme, FIFA 11+[22]. Discrepancies in  
35 awareness levels between members of the team around the players may be due to, unlike the  
36 current study surveying mostly physiotherapists, comparable studies having primarily  
37 surveyed head coaches which clearly also have other responsibilities besides being updated on  
38 injury prevention exercises and measures.  
39  
40  
41  
42  
43  
44  
45  
46  
47

48 All delivery agents considering the ASP as capable of mitigating the burden of groin  
49 problems aligns with its evidence-based effect, and coincides with previously reported  
50 perceptions of the CA[12]. Moreover, the high ASP awareness level and the positive attitude  
51 towards its efficacy implies that the ASP dissemination strategies have been successful within  
52 this specific population of clinicians.  
53  
54  
55  
56  
57  
58  
59  
60



## Adoption

All respondents reported using the ASP throughout the season. This is a similar finding to the adoption rate seen for the CA[12] in male professional football, when only accounting for users being aware of the exercise. Compared to what has been reported for the Nordic Hamstring (NH) exercise[23] in male professional football however, the ASP adoption rate is substantially higher. Interestingly, all respondents stated that the evidence-based efficacy of the ASP was an important reason for choosing to adopt the programme. The discrepancy in ASP and NH adoption rates are interesting, as they share the same exercise characteristics, and both were originally studied in clinical trials including Norwegian male football teams[2, 23]. One variation, however, that may explain some of the discrepancy in adoption rates is the six-year's difference between our data collection and the data collection of the NH adoption[24]. This is likely due to evidence-based efforts to prevent injuries having improved among practitioners in elite teams in recent years[25].

## Implementation

When implementing the programme, the current study shows that delivery agents in professional football usually modify the ASP to fit their team's training philosophy and schedule. Similar findings have been demonstrated for the NH[24, 26] and the FIFA 11+[27, 28]. So far, no other studies on specific modifications of single-exercise injury prevention programmes exist.

The original ASP protocol[2] prescribes a pre-season strengthening phase containing a detailed eight-week progression, and an in-season maintenance phase with a continuous number of repetitions. The intention is first, to provide hip adductor muscle strength gains, and second, to maintain the increased muscle strength, as reduced hip adductor muscle strength is the only consistently reported risk factor for groin injury in sports[29].

Compared to the original programme, in total, the delivery agents usually prescribed slightly more repetitions per session, but divided into two sets, especially during in-season. Furthermore, they generally conducted fewer sessions per week during pre-season, and the vast majority did not adopt the eight-week progression recommended for pre-season.

We did not investigate why the delivery agents modified the ASP. However, a potential reason for non-progression during pre-season strengthening phase might be that the delivery

agents consider most professional players to already have gained, and maintained, adequate hip adductor muscle strength. This would limit the delivery agent's perceived need for players to commence a progressive strengthening phase. Another reason for the modifications of the ASP could also be lack of support and acceptance from players and/or coaches. Such support is considered a key facilitator in the implementation process[9, 22] and, motivation to comply with the original ASP protocol has already been shown to be low among players[11]. A reason for modifying previous injury prevention strengthening exercises has been attributed to a possible fear of muscle soreness[13, 30]. However, only two respondents reported to have modified the ASP partly due to such fear, and there is evidence that even the most strenuous level of the ASP barely caused any reported muscle soreness if the number of repetitions was progressed gradually[31, 32]. Consequently, fear of muscle soreness seems to not be an important barrier to optimal ASP implementation in the real-world setting.

### **Effectiveness of the real-world application of the ASP**

An important aspect is that the delivery agents modify the ASP without knowing the impact. As mentioned, the ASP aims to mitigate groin problems by targeting hip adductor muscle strength. There is compelling evidence that muscle strength effects are dose dependent[33], which also has been suggested for the CA[34]. The reported used pre-season ASP exercise volume is approximately 640 repetitions during eight weeks, which, interestingly, is a higher volume than what the evidence-based original ASP protocol prescribes (470 repetitions)[2]. Moreover, it accommodates a suggested minimum of 500-800 repetitions during eight weeks, when aiming to facilitate meaningful hip adductor muscle strength gains[34]. Since the reported used weekly in-season ASP exercise volume is almost equal to pre-season, it is reasonable to assume that players somewhat maintain their hip adductor muscle strength during in-season.

Beyond volume considerations, progression seems required to elicit the greatest strength training gains[35]. As the ASP consists of a bodyweight exercise, weekly increase in the number of repetitions is the main progression variable. A critical assessment is therefore whether the reported lack of pre-season progression can reduce the ASP's effectiveness in groin problem mitigation. Additionally, muscle strength gains also depends on recruitment of high-threshold motor units, through accumulation of neuromuscular fatigue induced when performing sets to at least somewhat near neuromuscular failure[36]. Therefore, another

1  
2  
3 critical assessment would be whether more sets but fewer repetitions per set, as respondents  
4 have reported, affect the ASP's effectiveness.  
5  
6  
7

8 So far, changes in physiological characteristics when performing the ASP, such as effects on  
9 muscle cross-sectional area and architecture, musculotendinous stiffness, and motor unit  
10 recruitment and synchronization[35], have not been scientifically investigated. Similarly, the  
11 exact dose-response relationship between ASP exercise volume and hip adductor muscle  
12 strength gains, and between ASP exercise volume and groin injury mitigation rates also  
13 remains to be investigated. And lastly, the importance of a progression strengthening phase(s)  
14 when aiming to mitigate groin problems, is unknown. Discussions around the most often-used  
15 modification's impact on the ASP's effectiveness are therefore currently theoretical, only.  
16  
17  
18  
19  
20  
21  
22  
23

24 Consequently, we will argue that there is no convincing evidence claiming that the ASP  
25 modifications applied by the delivery agents affect the mitigation of groin problems in male  
26 professional players, compared to the original protocol. Additionally, considerations on ASP  
27 exercise volume and other modifications are subordinated to the fact that no injury prevention  
28 programme will reach its full potential unless it is implemented, adopted, and maintained, by  
29 teams in the real-world setting[19].  
30  
31  
32  
33  
34  
35

## 36 Maintenance

37  
38 To be successful, the final step of any injury prevention exercise implemented in the real-  
39 world setting is that the exercise or the program is maintained over multiple seasons. In our  
40 study, nearly all respondents planned to continue using the ASP in the subsequent season,  
41 representing a considerably higher maintenance level than previously reported[11]. A  
42 particular challenge, however, is that team staff members, including medical staff, are  
43 frequently replaced when managers are replaced, increasing the risk of preventative measures  
44 not being persistently maintained over time[19]. It is yet to be confirmed whether ASP has  
45 been established as part of the teams' or clubs' sports plans or policies on injury prevention  
46 measures.  
47  
48  
49  
50  
51  
52  
53  
54  
55  
56  
57  
58  
59  
60

## Methodological considerations

The high response rate (91%) is a strength of this study. However, it is uncertain whether our results can be generalised to other delivery agents and professional football settings outside Norway. Especially, considering that the original ASP intervention study was conducted among Norwegian male football teams. This may have led to a “word of mouth” effect in the Norwegian football community, which to some extent can explain the higher ASP awareness level and adoption rates in this study.

A further strength of the current study is the pilot testing of the questionnaire ensuring valuable input to the final questionnaire. A limitation is that the internal validity of the questionnaire was not systematically explored, which is a prerequisite to draw firm valid conclusions[37]. The pilot study ensured, however, some degree of internal validity, by providing adequate understanding and readability of the questionnaire dimensions. Furthermore, questions related to the “implementation” dimensions, especially regarding the pre-season application of the ASP, are prone to some degree of recall bias as the survey was conducted towards the end of the competitive season[38]. Therefore, this study describes how the teams in overall perform the ASP, only, while it is likely that the programme was individualised depending on players previous injury record and experience with specific strength exercises. Moreover, this study did not include a question about delivery agents’ perceived involvement in and support from players and coaches, which is considered a key facilitator to successful implementation in the real-world football setting[9].

Importantly, 79% of the respondents had a defined team staff role as a physiotherapist. This contrasts with previous studies, where surveyed delivery agents were either strength and conditioning coaches, head coaches or medical doctors[22, 26, 30, 39, 40]. In contrast to the other members of the medical and coaching staff, physiotherapists are educated and trained in health science with special emphasis on injury prevention and rehabilitation. Therefore, it is not unlikely that some of the variations in attitudes, beliefs and behaviour between the present and previous studies are due to differences in the participant’s formal team staff role and educational background.

Regarding data collection methods, we chose to develop and conduct a survey for the following reasons. Firstly, a survey is an appropriate tool to collect responses from

1  
2  
3 individuals living in a widespread geographical area. Secondly, it is suitable when  
4 investigating several variables at the same time, such as all the RE-AIM dimensions, and  
5  
6 thirdly, a survey provides a cost-effective and relatively seamless data collection method.  
7  
8 Therefore, a survey using a questionnaire was considered appropriate to accommodate the  
9  
10 research questions in our study.  
11  
12  
13

## 14 **PERSPECTIVES**

16 The delivery agents are aware of the ASP, they have adopted it, and they anticipate  
17 maintaining the usage. The implementation of the programme, however, is slightly different  
18 in each team. Further studies are warranted to acquire knowledge about why the ASP is being  
19 modified, and the impact of the modifications on the ASP's effectiveness. As this in previous  
20 studies primarily has been conducted in male adult teams, future studies should include  
21 women's and youth football, too. Also, widespread dissemination of the ASP outside the  
22 Scandinavian countries is needed to achieve reach world-wide. Finally, as  
23 recommended[9], similar investigations of attitudes, beliefs, and behaviour to the ASP among  
24 other stakeholder, e.g. coaches, club officials and relevant sporting organisations, are needed  
25 in order to further explore the complexity of introducing preventative measures in the real-  
26 world professional setting.  
27  
28  
29  
30  
31  
32  
33  
34  
35  
36  
37  
38

## 39 **CONCLUSION**

41 The present study found that delivery agents of injury prevention exercises in Norwegian  
42 male professional football teams have positive attitudes and beliefs to the ASP, using it  
43 frequently and planning to maintain the usage of it in the subsequent season. Most delivery  
44 agents, however, instructed players to complete the ASP with modifications. Therefore, we  
45 have identified a real-world application of the ASP protocol used in a professional team  
46 setting.  
47  
48  
49  
50  
51  
52  
53  
54

## 55 **Acknowledgements**

1  
2  
3 The authors would like to thank Ben Clarsen for review of and helpful comments on the  
4 manuscript. The authors would also like to thank all the delivery agents for their participation  
5 in the study.  
6  
7  
8  
9

### 10 **Competing interests**

11 None declared  
12  
13  
14

### 15 **Funding**

16 The Oslo Sports Trauma Research Center has been established at the Norwegian School of  
17 Sport Sciences through generous grants from the Royal Norwegian Ministry of Culture, the  
18 South-Eastern Norway Regional Health Authority, the International Olympic Committee, the  
19 Norwegian Olympic Committee and Confederation of Sport, and Norsk Tipping AS.  
20  
21  
22  
23  
24  
25

### 26 **Author contributions**

27 All authors planned the study. The data collection and the data analysis were done by JS. All  
28 authors have been involved in the drafting and revision of the manuscript, and all have  
29 approved the final version.  
30  
31  
32  
33  
34  
35  
36  
37  
38  
39  
40  
41

## 42 **REFERENCES**

- 43  
44  
45  
46 [1] M. Waldén, M. Hagglund, and J. Ekstrand, "The epidemiology of groin injury in  
47 senior football: a systematic review of prospective studies," (in eng), *Br J Sports Med*,  
48 vol. 49, no. 12, pp. 792-7, Jun 2015, doi: 10.1136/bjsports-2015-094705.  
49 [2] J. Harøy *et al.*, "The Adductor Strengthening Programme prevents groin problems  
50 among male football players: a cluster-randomised controlled trial," *British Journal of*  
51 *Sports Medicine*, vol. 53, no. 3, pp. 150-157, 2019, doi: 10.1136/bjsports-2017-  
52 098937.  
53 [3] J. Harøy, B. Clarsen, K. Thorborg, P. Hölmich, R. Bahr, and T. E. Andersen, "Groin  
54 Problems in Male Soccer Players Are More Common Than Previously Reported," (in  
55 eng), *Am J Sports Med*, vol. 45, no. 6, pp. 1304-1308, May 2017, doi:  
56 10.1177/0363546516687539.  
57 [4] A. Serner, M. D. Jakobsen, L. L. Andersen, P. Hölmich, E. Sundstrup, and K.  
58 Thorborg, "EMG evaluation of hip adduction exercises for soccer players:  
59  
60

- implications for exercise selection in prevention and treatment of groin injuries," *British Journal of Sports Medicine*, vol. 48, no. 14, pp. 1108-1114, 2014, doi: 10.1136/bjsports-2012-091746.
- [5] A. H. Engebretsen, G. Myklebust, I. Holme, L. Engebretsen, and R. Bahr, "Prevention of injuries among male soccer players: a prospective, randomized intervention study targeting players with previous injuries or reduced function," (in eng), *Am J Sports Med*, vol. 36, no. 6, pp. 1052-60, Jun 2008, doi: 10.1177/0363546508314432.
- [6] P. Hölmich, K. Larsen, K. Krogsgaard, and C. Gluud, "Exercise program for prevention of groin pain in football players: a cluster-randomized trial," *Scandinavian journal of medicine & science in sports*, vol. 20, no. 6, pp. 814-821, 2010.
- [7] J. O'Brien, A. Donaldson, and C. F. Finch, "It will take more than an existing exercise programme to prevent injury," (in eng), *Br J Sports Med*, vol. 50, no. 5, pp. 264-5, Mar 2016, doi: 10.1136/bjsports-2015-094841.
- [8] R. E. Glasgow, T. M. Vogt, and S. M. Boles, "Evaluating the public health impact of health promotion interventions: the RE-AIM framework," (in eng), *Am J Public Health*, vol. 89, no. 9, pp. 1322-7, Sep 1999, doi: 10.2105/ajph.89.9.1322.
- [9] C. F. Finch and A. Donaldson, "A sports setting matrix for understanding the implementation context for community sport," *British Journal of Sports Medicine*, vol. 44, no. 13, pp. 973-978, 2010, doi: 10.1136/bjism.2008.056069.
- [10] D. Fixsen, S. Naoom, K. Blase, R. Friedman, and F. Wallace, "Implementation Research: A Synthesis of the Literature," *The National Implementation Research Network*, vol. 97, 01/01 2005.
- [11] J. Harøy, E. G. Wiger, R. Bahr, and T. E. Andersen, "Implementation of the Adductor Strengthening Programme: Players primed for adoption but reluctant to maintain - A cross-sectional study," (in eng), *Scand J Med Sci Sports*, vol. 29, no. 8, pp. 1092-1100, Aug 2019, doi: 10.1111/sms.13444.
- [12] W. Al Attar, M. Husain, A. Qasem, N. Masoudi, and H. Ghulam, "The Copenhagen Adduction Exercise is not Applied by the Majority of Professional and Semi-Professional Soccer Players and Coaches," *Annals of Applied Sport Science*, p. e983, 06/05 2021, doi: 10.52547/aassjournal.983.
- [13] A. McCall *et al.*, "Exercise-Based Strategies to Prevent Muscle Injury in Male Elite Footballers: An Expert-Led Delphi Survey of 21 Practitioners Belonging to 18 Teams from the Big-5 European Leagues," *Sports Medicine*, vol. 50, no. 9, pp. 1667-1681, 2020/09/01 2020, doi: 10.1007/s40279-020-01315-7.
- [14] E. Von Elm, D. G. Altman, M. Egger, S. J. Pocock, P. C. Gøtzsche, and J. P. Vandenbroucke, "The Strengthening the Reporting of Observational Studies in Epidemiology (STROBE) statement: guidelines for reporting observational studies," *Bulletin of the World Health Organization*, vol. 85, pp. 867-872, 2007.
- [15] S. H. Andersson, R. Bahr, B. Clarsen, and G. Myklebust, "Preventing overuse shoulder injuries among throwing athletes: a cluster-randomised controlled trial in 660 elite handball players," (in eng), *Br J Sports Med*, vol. 51, no. 14, pp. 1073-1080, Jul 2017, doi: 10.1136/bjsports-2016-096226.
- [16] A. Canhoto, S. Rose, and N. Spinks, *Management Research – Applying the Principles*. 2014.
- [17] C. F. Finch, P. White, D. Twomey, and S. Ullah, "Implementing an exercise-training programme to prevent lower-limb injuries: considerations for the development of a randomised controlled trial intervention delivery plan," (in eng), *Br J Sports Med*, vol. 45, no. 10, pp. 791-6, Aug 2011, doi: 10.1136/bjism.2010.081406.
- [18] J. Forman, M. Heisler, L. J. Damschroder, E. Kaselitz, and E. A. Kerr, "Development and application of the RE-AIM QuEST mixed methods framework for program

- evaluation," (in eng), *Prev Med Rep*, vol. 6, pp. 322-328, Jun 2017, doi: 10.1016/j.pmedr.2017.04.002.
- [19] J. O'Brien, M. Hägglund, and M. Bizzini, *Implementing injury prevention. The rocky road from RCT to real-world injury reduction*. 2018.
- [20] S. A. Richmond *et al.*, "Facilitators and Barriers to the Implementation of iSPRINT: A Sport Injury Prevention Program in Junior High Schools," (in eng), *Clin J Sport Med*, vol. 30, no. 3, pp. 231-238, May 2020, doi: 10.1097/jsm.0000000000000579.
- [21] J. Werner, M. Hägglund, J. Ekstrand, and M. Waldén, "Hip and groin time-loss injuries decreased slightly but injury burden remained constant in men's professional football: the 15-year prospective UEFA Elite Club Injury Study," (in eng), *Br J Sports Med*, vol. 53, no. 9, pp. 539-546, May 2019, doi: 10.1136/bjsports-2017-097796.
- [22] J. O'Brien and C. F. Finch, "Injury prevention exercise programmes in professional youth soccer: understanding the perceptions of programme deliverers," (in eng), *BMJ Open Sport Exerc Med*, vol. 2, no. 1, p. e000075, 2016, doi: 10.1136/bmjsem-2015-000075.
- [23] A. Arnason, T. E. Andersen, I. Holme, L. Engebretsen, and R. Bahr, "Prevention of hamstring strains in elite soccer: an intervention study," (in eng), *Scand J Med Sci Sports*, vol. 18, no. 1, pp. 40-8, Feb 2008, doi: 10.1111/j.1600-0838.2006.00634.x.
- [24] R. Bahr, K. Thorborg, and J. Ekstrand, "Evidence-based hamstring injury prevention is not adopted by the majority of Champions League or Norwegian Premier League football teams: the Nordic Hamstring survey," (in eng), *Br J Sports Med*, vol. 49, no. 22, pp. 1466-71, Nov 2015, doi: 10.1136/bjsports-2015-094826.
- [25] J. O'Brien and C. F. Finch, "The implementation of musculoskeletal injury-prevention exercise programmes in team ball sports: a systematic review employing the RE-AIM framework," (in eng), *Sports Med*, vol. 44, no. 9, pp. 1305-18, Sep 2014, doi: 10.1007/s40279-014-0208-4.
- [26] W. S. A. Al Attar, N. Soomro, P. J. Sinclair, E. Pappas, Q. I. Muaidi, and R. H. Sanders, "Implementation of an evidence-based injury prevention program in professional and semi-professional soccer," *International Journal of Sports Science & Coaching*, vol. 13, no. 1, pp. 113-121, 2018, doi: 10.1177/1747954117707482.
- [27] J. O'Brien, W. Young, and C. F. Finch, "The use and modification of injury prevention exercises by professional youth soccer teams," (in eng), *Scand J Med Sci Sports*, vol. 27, no. 11, pp. 1337-1346, Nov 2017, doi: 10.1111/sms.12756.
- [28] J. Shamlaye, L. Tomšovský, and M. L. Fulcher, "Attitudes, beliefs and factors influencing football coaches' adherence to the 11+ injury prevention programme," *BMJ Open Sport & Exercise Medicine*, vol. 6, no. 1, p. e000830, 2020, doi: 10.1136/bmjsem-2020-000830.
- [29] J. L. Whittaker, C. Small, L. Maffey, and C. A. Emery, "Risk factors for groin injury in sport: an updated systematic review," (in eng), *Br J Sports Med*, vol. 49, no. 12, pp. 803-9, Jun 2015, doi: 10.1136/bjsports-2014-094287.
- [30] A. McCall, G. Dupont, and J. Ekstrand, "Injury prevention strategies, coach compliance and player adherence of 33 of the UEFA Elite Club Injury Study teams: a survey of teams' head medical officers," *British Journal of Sports Medicine*, vol. 50, no. 12, pp. 725-730, 2016, doi: 10.1136/bjsports-2015-095259.
- [31] J. Harøy *et al.*, "Including the Copenhagen Adduction Exercise in the FIFA 11+ Provides Missing Eccentric Hip Adduction Strength Effect in Male Soccer Players: A Randomized Controlled Trial," (in eng), *Am J Sports Med*, vol. 45, no. 13, pp. 3052-3059, Nov 2017, doi: 10.1177/0363546517720194.
- [32] G. Polglass, A. Burrows, and M. Willett, "Impact of a modified progressive Copenhagen adduction exercise programme on hip adduction strength and



- 1  
2  
3 postexercise muscle soreness in professional footballers," *BMJ Open Sport &*  
4 *Exercise Medicine*, vol. 5, no. 1, p. e000570, 2019, doi: 10.1136/bmjsem-2019-  
5 000570.
- 6  
7 [33] G. W. Ralston, L. Kilgore, F. B. Wyatt, and J. S. Baker, "The Effect of Weekly Set  
8 Volume on Strength Gain: A Meta-Analysis," (in eng), *Sports Med*, vol. 47, no. 12,  
9 pp. 2585-2601, Dec 2017, doi: 10.1007/s40279-017-0762-7.
- 10 [34] L. Ishøi and K. Thorborg, "Copenhagen adduction exercise can increase eccentric  
11 strength and mitigate the risk of groin problems: but how much is enough!," *British*  
12 *Journal of Sports Medicine*, pp. bjsports-2020-103564, 2021, doi: 10.1136/bjsports-  
13 2020-103564.
- 14 [35] T. J. Suchomel, S. Nimphius, C. R. Bellon, and M. H. Stone, "The Importance of  
15 Muscular Strength: Training Considerations," *Sports Medicine*, vol. 48, no. 4, pp. 765-  
16 785, 2018/04/01 2018, doi: 10.1007/s40279-018-0862-z.
- 17 [36] L. S. Pescatello, D. Riebe, and P. D. Thompson, *ACSM's guidelines for exercise*  
18 *testing and prescription*. Lippincott Williams & Wilkins, 2014.
- 19 [37] A. H. Pripp, "Validitet," *Tidsskrift for den Norske Laegeforening*, vol. 138, no. 13,  
20 2018, doi: 10.4045/tidsskr.18.0398
- 21 [38] M. Porta, *A Dictionary of Epidemiology*. Oxford University Press (in English), 2014.
- 22 [39] A. McCall *et al.*, "Risk factors, testing and preventative strategies for non-contact  
23 injuries in professional football: current perceptions and practices of 44 teams from  
24 various premier leagues," (in eng), *Br J Sports Med*, vol. 48, no. 18, pp. 1352-7, Sep  
25 2014, doi: 10.1136/bjsports-2014-093439.
- 26 [40] A. McCall *et al.*, "Injury prevention strategies at the FIFA 2014 World Cup:  
27 perceptions and practices of the physicians from the 32 participating national teams,"  
28 *British Journal of Sports Medicine*, vol. 49, no. 9, pp. 603-608, 2015, doi:  
29 10.1136/bjsports-2015-094747.
- 30  
31  
32  
33  
34  
35  
36  
37  
38  
39  
40  
41  
42  
43  
44  
45  
46  
47  
48  
49  
50  
51  
52  
53  
54  
55  
56  
57  
58  
59  
60

1  
2  
3  
4  
5  
6  
7  
8  
9  
10  
11  
12  
13  
14  
15  
16  
17  
18  
19  
20  
21  
22  
23  
24  
25  
26  
27  
28  
29  
30  
31  
32  
33  
34  
35  
36  
37  
38  
39  
40  
41  
42  
43  
44  
45  
46  
47  
48  
49  
50  
51  
52  
53  
54  
55  
56  
57  
58  
59  
60



Figure 1: Beliefs regarding whether Adductor Strengthening Programme can influence availability of players in training and match-play. \*No respondent replied some decrease, large decrease or don't know.

382x75mm (130 x 130 DPI)

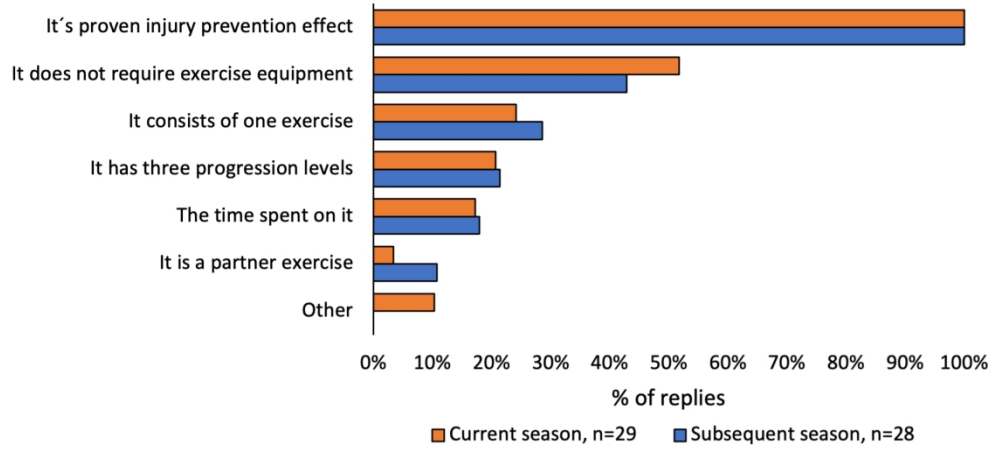

Figure 2: Reasons for choosing to use the Adductor Strengthening Programme this season and reasons for planning using the programme the following season.

372x174mm (130 x 130 DPI)

# Questionnaire

Have you read and approved the informed consent?

Yes

1. What is your age?

18-30 years

31-45 years

46-60 years

More than 60 years

2. At what level does the team where you are employed play?

Eliteserien (Norwegian Premier League)

OBOS-ligaen (Norwegian First Division)

3. What is your role in the team staff where you are employed?

Head coach

Assistant coach

Fitness coach

Physiotherapist

Medical doctor

Other healthcare profession (specify) \_\_\_\_\_

Other position (specify) \_\_\_\_\_

4. What education and / or courses do you have?

It is possible to check several options

UEFA PRO License

UEFA A License

UEFA B License

One-year study in sport science

Bachelor's degree in sport science

Master's degree in sport science

Bachelor's degree in a health profession

Master's degree in a health profession

Other education and/or courses (specify) \_\_\_\_\_

- 1  
2  
3 5. How many years of experience do you have as delivery agent of preventative training  
4 for football players?  
5  
6  0-4 years  
7  5-9 years  
8  10-14 years  
9  15-20 years  
10  More than 20 years  
11  
12  
13

14 **Further, you will get two questions that deal with groin problems.**

15 By groin problems is meant any pain, ache, stiffness, clicking/catching or other complaints  
16 related to the groin, or reduced training participation, training volume or performance due to  
17 groin problems.  
18  
19

- 20  
21 6. How much risk do you think football players have getting groin problems?  
22  Great risk  
23  Moderate risk  
24  Small risk  
25  No risk  
26  Don't know  
27  
28  
29  
30  
31 7. How important do you think it is to perform preventative training to mitigate groin  
32 problems?  
33  Greatly important  
34  Moderately important  
35  A little important  
36  Not important  
37  Don't know  
38  
39  
40  
41 8. Were you aware of the "Adductor Strengthening Programme" and/or the "Copenhagen  
42 Adduction" exercise prior to reading the information in the introduction to this  
43 questionnaire?  
44  Yes  
45  No  
46  Don't know  
47  
48  
49  
50  
51  
52  
53  
54  
55  
56  
57  
58  
59  
60

- 1  
2  
3 9. Where did you get information about the “Adductor Strengthening Programme”  
4 and/or the "Copenhagen Adduction Exercise"?

5  
6 It is possible to check several options

- 7  “Skadefri” website  
8  “Skadefri” application  
9  Article in the British Journal of Sports Medicine  
10  Conference/course  
11  Infographics  
12  Social media (Twitter, Facebook, Instagram etc.)  
13  Other (specify) \_\_\_\_\_  
14  Don’t know

- 15  
16  
17  
18  
19 10. Check if you are aware that you can find information about the “Adductor  
20 Strengthening Programme” and/or the «Copenhagen Adduction Exercise» in these  
21 relevant places:

22  
23 It is possible to check several options

- 24  “Skadefri” website  
25  “Skadefri” application  
26  Article in the British Journal of Sports Medicine  
27  Infographics  
28  Social media (Twitter, Facebook, Instagram etc.)  
29  Other (specify) \_\_\_\_\_

30  
31  
32  
33  
34 **Further, you will get two questions that deal with groin problems.**

35 By groin problems is meant any pain, ache, stiffness, clicking/catching or other complaints  
36 related to the groin, or reduced training participation, training volume or performance due to  
37 groin problems.  
38  
39

- 40  
41 11. Do you think that the “Adductor Strengthening Programme” can influence the burden  
42 of groin problems?

- 43  Yes, the program can greatly mitigate the burden  
44  Yes, the program can moderately mitigate the burden  
45  No, the program cannot have an effect on the burden  
46  Yes, the program can moderately aggravate the burden  
47  Yes, the program can greatly aggravate the burden  
48  Don’t know  
49  
50  
51  
52  
53  
54  
55  
56  
57  
58  
59  
60

1  
2  
3 12. Do you think that the “Adductor Strengthening Programme” can influence football  
4 performance?  
5

- 6  Yes, the program can greatly increase performance  
7  Yes, the program can moderately increase performance  
8  No, the program cannot have an effect on performance  
9  Yes, the program can moderately decrease performance  
10  Yes, the program can greatly decrease performance  
11  Don't know  
12  
13  
14

15 **How do you think the following of the players' physical skills may be affected by doing**  
16 **the “Adductor Strengthening Programme”?**  
17

18  
19 13. Linear acceleration?  
20

- 21  Large increase  
22  Some increase  
23  Unchanged  
24  Some decrease  
25  Large decrease  
26  Don't know  
27  
28  
29

30 14. Top speed?  
31

- 32  Large increase  
33  Some increase  
34  Unchanged  
35  Some decrease  
36  Large decrease  
37  Don't know  
38  
39  
40

41 15. Change of direction?  
42

- 43  Large increase  
44  Some increase  
45  Unchanged  
46  Some decrease  
47  Large decrease  
48  Don't know  
49  
50  
51  
52  
53  
54  
55  
56  
57  
58  
59  
60

1  
2  
3 16. Vertical jump ability?

- 4
- 
- Large increase
- 
- 5
- 
- Some increase
- 
- 6
- 
- Unchanged
- 
- 7
- 
- Some decrease
- 
- 8
- 
- Large decrease
- 
- 9
- 
- Don't know
- 
- 10
- 
- 11
- 
- 12
- 
- 13

## 14 17. Duelling power?

- 15
- 
- Large increase
- 
- 16
- 
- Some increase
- 
- 17
- 
- Unchanged
- 
- 18
- 
- Some decrease
- 
- 19
- 
- Large decrease
- 
- 20
- 
- Don't know
- 
- 21
- 
- 22
- 
- 23
- 
- 24

25 **How do you think other factors can may be affected by doing the “Adductor**  
26 **Strengthening Programme”:**  
27  
28

## 29 18. Availability of players for match?

- 30
- 
- Large increase
- 
- 31
- 
- Some increase
- 
- 32
- 
- Unchanged
- 
- 33
- 
- Some decrease
- 
- 34
- 
- Large decrease
- 
- 35
- 
- Don't know
- 
- 36
- 
- 37
- 
- 38
- 
- 39

## 40 19. Availability of players for training?

- 41
- 
- Large increase
- 
- 42
- 
- Some increase
- 
- 43
- 
- Unchanged
- 
- 44
- 
- Some decrease
- 
- 45
- 
- Large decrease
- 
- 46
- 
- Don't know
- 
- 47
- 
- 48
- 
- 49
- 
- 50

## 51 20. Chance of winning a match?

- 52
- 
- Large increase
- 
- 53
- 
- Some increase
- 
- 54
- 
- Unchanged
- 
- 55
- 
- Some decrease
- 
- 56
- 
- Large decrease
- 
- 57
- 
- Don't know
- 
- 58
- 
- 59
- 
- 60



1  
2  
3 21. What other positive characteristics / achievements / consequences do you think the  
4 “Adductor Strengthening Programme” can provide? Describe in your own words.  
5

6  
7  
8  
9  
10  
11  
12

13  
14 22. What other negative characteristics / achievements / consequences do you think the  
15 “Adductor Strengthening Programme” can provide? Describe in your own words.  
16

17  
18  
19  
20  
21  
22

23  
24 23. Do you use the “Adductor Strengthening Programme” in your team?  
25

- 26  Yes, as described in the protocol  
27  Yes, as modified version  
28  No  
29  Don't know  
30  
31

32  
33 24. How do you use the “Adductor Strengthening Programme” in your training schedule?  
34

- 35  As part of organised football training  
36  As part of organised strength training  
37  As an independent preparation in the locker room or strength room before  
38 training  
39  As guided preparation in the locker room or strength room before training  
40  As independent training in a separate strength training session  
41  Other way (specify) \_\_\_\_\_  
42  
43  
44

45 **When using the “Adductor Strengthening Programme” in season (under normal**  
46 **circumstances, not influenced by covid-19):**  
47

48  
49 25. How often did the players perform the program?  
50

- 51  More than once a week  
52  Once a week  
53  Once every two weeks  
54  We carried out the program, but less than once every two weeks  
55  
56

57 26. How many sets did the players perform?  
58

- 59  More than 2 sets per side  
60  2 sets per side

- 1  
2  
3  1 set per side  
4  
5

6 27. How many repetitions did the players perform in each set?

- 7  More than 15 repetitions per side  
8  12-15 repetitions per side  
9  8-11 repetitions per side  
10  4-7 repetitions per side  
11  Less than 4 repetitions per side  
12  
13  
14

15 **When using the “Adductor Strengthening Programme” in preseason (under normal**  
16 **circumstances, not influenced by covid-19):**  
17

18  
19 28. How often did the players perform the program?

- 20  More than 3 times a week  
21  3 times a week  
22  Twice a week  
23  Once a week  
24  We carried out the program, but less than once a week  
25  
26  
27  
28

29 29. How many sets did the players perform?

- 30  More than 2 sets per side  
31  2 sets per side  
32  1 set per side  
33  
34  
35

36 30. How many repetitions did the players perform in each set?

- 37  More than 15 repetitions per set each week  
38  12-15 repetitions per set each week  
39  7-10 repetitions per set each week  
40  3-5 repetitions per set each week  
41  3-15 repetitions per set, weekly progressive (as in protocol)  
42  3-15 repetitions per set, weekly progressive (as own modification)  
43  
44  
45  
46

47 31. What has been important for you in choosing to use the “Adductor Strengthening  
48 Programme”?

49 It is possible to check several options

- 50  The program's injury prevention effect  
51  The time spent on the program  
52  The programme consists of one exercise  
53  The programme consists of three progression levels  
54  The programme is a partner exercise  
55  The programme does not require exercise equipment  
56  Other (specify) \_\_\_\_\_  
57  
58  
59  
60

1  
2  
3  
4  
5  
6  
7  
8  
9  
10  
11  
12  
13  
14  
15  
16  
17  
18  
19  
20  
21  
22  
23  
24  
25  
26  
27  
28  
29  
30  
31  
32  
33  
34  
35  
36  
37  
38  
39  
40  
41  
42  
43  
44  
45  
46  
47  
48  
49  
50  
51  
52  
53  
54  
55  
56  
57  
58  
59  
60

32. Do you use other preventative training in addition to the “Adductor Strengthening Programme”, with the intention to mitigate the burden of groin problems?

- Yes
- No
- Don't know

33. What training do you use in addition to, or instead of, the “Adductor Strengthening Programme” to mitigate the burden of groin problems? Describe in your own words as detailed as possible which exercise (s), how they are performed, dosage (series, repetitions, intensity), and anything else you consider relevant.

34. Why did you choose to do what is described in the previous answer, and who participated in the decision? Describe in your own words.

35. Do you anticipate using the “Adductor Strengthening Programme” in your team the following season?

- Yes, as described in the protocol
- Yes, as an own modification
- No
- Don't know

36. What is the reason why you anticipate using the “Adductor Strengthening Programme” in your team in the following season?

It is possible to check several options

- The program's injury prevention effect
- The time spent on the program
- The program consists of one exercise
- The program consists of three progression levels
- The program can be performed as a partner exercise
- The program does not require exercise equipment
- Other (specify) \_\_\_\_\_

1  
2  
3 37. What is the reason why you do not anticipate using the “Adductor Strengthening  
4 Programme” in your team in the following season?

5  
6 It is possible to check several options

- 7  The program's lack of injury prevention effect  
8  The time spent on the program  
9  The program consists of only one exercise  
10  The program consists of only three levels of difficulty  
11  The program can be performed as a partner exercise  
12  The program does not require exercise equipment  
13  Other (specify) \_\_\_\_\_  
14  
15  
16  
17

18 38. Do you have any suggestions for changes to the “Adductor Strengthening  
19 Programme” that may make it more relevant to use the program? Describe in your  
20 own words.  
21

22  
23  
24  
25  
26  
27  
28  
29  
30  
31  
32  
33  
34  
35  
36  
37  
38  
39  
40  
41  
42  
43  
44  
45  
46  
47  
48  
49  
50  
51  
52  
53  
54  
55  
56  
57  
58  
59  
60

STROBE Statement—Checklist of items that should be included in reports of *cross-sectional studies*

|                              | Item No | Recommendation                                                                                                                                                                                               | Page No |
|------------------------------|---------|--------------------------------------------------------------------------------------------------------------------------------------------------------------------------------------------------------------|---------|
| <b>Title and abstract</b>    | 1       | (a) Indicate the study's design with a commonly used term in the title or the abstract                                                                                                                       | 2       |
|                              |         | (b) Provide in the abstract an informative and balanced summary of what was done and what was found                                                                                                          | 2       |
| <b>Introduction</b>          |         |                                                                                                                                                                                                              |         |
| Background/rationale         | 2       | Explain the scientific background and rationale for the investigation being reported                                                                                                                         | 4       |
| Objectives                   | 3       | State specific objectives, including any prespecified hypotheses                                                                                                                                             | 5       |
| <b>Methods</b>               |         |                                                                                                                                                                                                              |         |
| Study design                 | 4       | Present key elements of study design early in the paper                                                                                                                                                      | 5       |
| Setting                      | 5       | Describe the setting, locations, and relevant dates, including periods of recruitment, exposure, follow-up, and data collection                                                                              | 5       |
| Participants                 | 6       | (a) Give the eligibility criteria, and the sources and methods of selection of participants                                                                                                                  | 5       |
| Variables                    | 7       | Clearly define all outcomes, exposures, predictors, potential confounders, and effect modifiers. Give diagnostic criteria, if applicable                                                                     | -       |
| Data sources/<br>measurement | 8*      | For each variable of interest, give sources of data and details of methods of assessment (measurement). Describe comparability of assessment methods if there is more than one group                         | -       |
| Bias                         | 9       | Describe any efforts to address potential sources of bias                                                                                                                                                    | -       |
| Study size                   | 10      | Explain how the study size was arrived at                                                                                                                                                                    | 5-6     |
| Quantitative variables       | 11      | Explain how quantitative variables were handled in the analyses. If applicable, describe which groupings were chosen and why                                                                                 | 6       |
| Statistical methods          | 12      | (a) Describe all statistical methods, including those used to control for confounding                                                                                                                        | 6       |
|                              |         | (b) Describe any methods used to examine subgroups and interactions                                                                                                                                          | -       |
|                              |         | (c) Explain how missing data were addressed                                                                                                                                                                  | -       |
|                              |         | (d) If applicable, describe analytical methods taking account of sampling strategy                                                                                                                           | -       |
|                              |         | (e) Describe any sensitivity analyses                                                                                                                                                                        | -       |
| <b>Results</b>               |         |                                                                                                                                                                                                              |         |
| Participants                 | 13*     | (a) Report numbers of individuals at each stage of study—eg numbers potentially eligible, examined for eligibility, confirmed eligible, included in the study, completing follow-up, and analysed            | 5-6     |
|                              |         | (b) Give reasons for non-participation at each stage                                                                                                                                                         | 6       |
|                              |         | (c) Consider use of a flow diagram                                                                                                                                                                           | -       |
| Descriptive data             | 14*     | (a) Give characteristics of study participants (eg demographic, clinical, social) and information on exposures and potential confounders                                                                     | 6       |
|                              |         | (b) Indicate number of participants with missing data for each variable of interest                                                                                                                          | -       |
| Outcome data                 | 15*     | Report numbers of outcome events or summary measures                                                                                                                                                         | 6-8     |
| Main results                 | 16      | (a) Give unadjusted estimates and, if applicable, confounder-adjusted estimates and their precision (eg, 95% confidence interval). Make clear which confounders were adjusted for and why they were included | Ok      |

|                          |    |                                                                                                                                                                            |    |
|--------------------------|----|----------------------------------------------------------------------------------------------------------------------------------------------------------------------------|----|
|                          |    | (b) Report category boundaries when continuous variables were categorized                                                                                                  | -  |
|                          |    | (c) If relevant, consider translating estimates of relative risk into absolute risk for a meaningful time period                                                           | -  |
| Other analyses           | 17 | Report other analyses done—eg analyses of subgroups and interactions, and sensitivity analyses                                                                             | -  |
| <b>Discussion</b>        |    |                                                                                                                                                                            |    |
| Key results              | 18 | Summarise key results with reference to study objectives                                                                                                                   | 8  |
| Limitations              | 19 | Discuss limitations of the study, taking into account sources of potential bias or imprecision. Discuss both direction and magnitude of any potential bias                 | 13 |
| Interpretation           | 20 | Give a cautious overall interpretation of results considering objectives, limitations, multiplicity of analyses, results from similar studies, and other relevant evidence | 13 |
| Generalisability         | 21 | Discuss the generalisability (external validity) of the study results                                                                                                      | 13 |
| <b>Other information</b> |    |                                                                                                                                                                            |    |
| Funding                  | 22 | Give the source of funding and the role of the funders for the present study and, if applicable, for the original study on which the present article is based              | 14 |

\*Give information separately for exposed and unexposed groups.

**Note:** An Explanation and Elaboration article discusses each checklist item and gives methodological background and published examples of transparent reporting. The STROBE checklist is best used in conjunction with this article (freely available on the Web sites of PLoS Medicine at <http://www.plosmedicine.org/>, Annals of Internal Medicine at <http://www.annals.org/>, and Epidemiology at <http://www.epidem.com/>). Information on the STROBE Initiative is available at [www.strobe-statement.org](http://www.strobe-statement.org).

# BMJ Open

## The Adductor Strengthening Programme is successfully adopted but frequently modified in Norwegian male professional football teams: a cross sectional study

|                                 |                                                                                                                                                                                                                                                                                                                                                                                                     |
|---------------------------------|-----------------------------------------------------------------------------------------------------------------------------------------------------------------------------------------------------------------------------------------------------------------------------------------------------------------------------------------------------------------------------------------------------|
| Journal:                        | <i>BMJ Open</i>                                                                                                                                                                                                                                                                                                                                                                                     |
| Manuscript ID                   | bmjopen-2021-060611.R3                                                                                                                                                                                                                                                                                                                                                                              |
| Article Type:                   | Original research                                                                                                                                                                                                                                                                                                                                                                                   |
| Date Submitted by the Author:   | 09-Jul-2022                                                                                                                                                                                                                                                                                                                                                                                         |
| Complete List of Authors:       | Stensø, Joakim; Norwegian School of Sports Sciences, Department of Sports Medicine<br>Andersen, Thor Einar; Oslo Sports Trauma Research Center, Norwegian School of Sports Sciences, Department of Sports Medicine; Norwegian FA Medical Clinic<br>Harøy, Joar; Oslo Sports Trauma Research Center, Norwegian School of Sports Sciences, Department of Sports Medicine; Norwegian FA Medical Clinic |
| <b>Primary Subject Heading</b>: | Sports and exercise medicine                                                                                                                                                                                                                                                                                                                                                                        |
| Secondary Subject Heading:      | Sports and exercise medicine                                                                                                                                                                                                                                                                                                                                                                        |
| Keywords:                       | SPORTS MEDICINE, PREVENTIVE MEDICINE, REHABILITATION MEDICINE                                                                                                                                                                                                                                                                                                                                       |
|                                 |                                                                                                                                                                                                                                                                                                                                                                                                     |

SCHOLARONE™  
Manuscripts



I, the Submitting Author has the right to grant and does grant on behalf of all authors of the Work (as defined in the below author licence), an exclusive licence and/or a non-exclusive licence for contributions from authors who are: i) UK Crown employees; ii) where BMJ has agreed a CC-BY licence shall apply, and/or iii) in accordance with the terms applicable for US Federal Government officers or employees acting as part of their official duties; on a worldwide, perpetual, irrevocable, royalty-free basis to BMJ Publishing Group Ltd ("BMJ") its licensees and where the relevant Journal is co-owned by BMJ to the co-owners of the Journal, to publish the Work in this journal and any other BMJ products and to exploit all rights, as set out in our [licence](#).

The Submitting Author accepts and understands that any supply made under these terms is made by BMJ to the Submitting Author unless you are acting as an employee on behalf of your employer or a postgraduate student of an affiliated institution which is paying any applicable article publishing charge ("APC") for Open Access articles. Where the Submitting Author wishes to make the Work available on an Open Access basis (and intends to pay the relevant APC), the terms of reuse of such Open Access shall be governed by a Creative Commons licence – details of these licences and which [Creative Commons](#) licence will apply to this Work are set out in our licence referred to above.

Other than as permitted in any relevant BMJ Author's Self Archiving Policies, I confirm this Work has not been accepted for publication elsewhere, is not being considered for publication elsewhere and does not duplicate material already published. I confirm all authors consent to publication of this Work and authorise the granting of this licence.



1  
2  
3 **The Adductor Strengthening Programme is successfully adopted**  
4 **but frequently modified in Norwegian male professional football**  
5 **teams: a cross sectional study**  
6  
7  
8  
9

10  
11  
12  
13  
14  
15  
16  
17 Joakim Stensø<sup>1</sup>, Thor Einar Andersen<sup>1,2</sup>, Joar Harøy<sup>1,2</sup>  
18  
19

20  
21 1 Oslo Sports Trauma Research Center, Department of Sports Medicine, Norwegian School  
22 of Sport Sciences, Oslo, Norway  
23

24 2 The Norwegian FA Medical Clinic, Oslo, Norway  
25  
26

27  
28 Corresponding author: Joakim Stensø

29 Postal address: Sørlogata 10 C, 0577 Oslo, Norway

30  
31 Email: [joakim.s.stenso@hotmail.no](mailto:joakim.s.stenso@hotmail.no)  
32  
33

34  
35 Word count: 3302  
36  
37  
38  
39  
40  
41  
42  
43  
44  
45  
46  
47  
48  
49  
50  
51  
52  
53  
54  
55  
56  
57  
58  
59  
60

## ABSTRACT

**Objectives:** Groin injuries represent a substantial problem in male football, with the Adductor Strengthening Programme (ASP) being the only exercise programme demonstrated to significantly reduce the risk of groin problems. We aimed first, to use the Reach Adoption Effectiveness Implementation Maintenance (RE-AIM) framework to investigate attitudes, beliefs, and behaviour to the ASP among primary delivery agents of injury prevention exercises in Norwegian male professional football teams. Secondly, we aimed to identify a real-world application of the ASP protocol used in a professional team setting.

**Design:** A descriptive cross-sectional survey, using a questionnaire designed to cover all five dimensions of the RE-AIM framework.

**Setting:** The top two divisions of Norwegian male professional football.

**Participants:** 32 primary injury prevention delivery agents

**Primary and secondary outcome measures:** Primarily, the proportion of respondents being aware of the ASP and its effect; having adopted it; having implemented it as intended; and considering maintaining using it. Secondary, the most often used ASP modifications.

**Results:** Twenty-nine (91%) participants responded. All (100%) respondents were aware of the ASP and its injury preventive effect. The two most stated reasons for using the ASP were its injury preventive effect and that it does not require equipment. The ASP was adopted by all (100%) delivery agents, but only 10% used it in accordance with the original protocol. The main modifications were that the players in 72% of the teams were instructed to perform a non-progressive number of repetitions during pre-season, and in 86% of the teams instructed to perform more sets, but fewer repetitions per set, during in-season. In total, 97% of the delivery agents planned to continue using the ASP.

**Conclusion:** The delivery agents have positive attitudes and beliefs to the ASP, but they frequently modify it. We identified and reported a real-world application of the ASP protocol.

1  
2  
3 **Key words:** Football, groin injury, injury prevention, Adductor Strengthening Programme,  
4 Copenhagen Adduction, RE-AIM, implementation  
5  
6  
7  
8  
9

### 10 **Strengths and limitations of this study**

- 13 • The questionnaire was pilot tested by delivery agents with relevant experience.
- 14 • Thorough data collection process leading to a high response rate.
- 15 • The internal validity of the questionnaire was not systematically explored.
- 16 • Some of the questionnaire's questions are prone to recall bias as the survey was  
17 conducted towards the end of the competitive season.  
18  
19  
20  
21  
22  
23  
24  
25  
26  
27  
28  
29  
30  
31  
32  
33  
34  
35  
36  
37  
38  
39  
40  
41  
42  
43  
44  
45  
46  
47  
48  
49  
50  
51  
52  
53  
54  
55  
56  
57  
58  
59  
60

## INTRODUCTION

Groin problems represent a substantial problem in football. They account for 4-19% and 2-11% of all time-loss injuries in male and female football, respectively[1]. Moreover, the average weekly proportion of male players with any groin problem causing pain and/or reduced performance is 21% in a full competitive season[2] and, 29% in periods with match congestion[3].

In a clinical trial, the Adductor Strengthening Programme (ASP) showed a significant 41% reduction in risk of groin problems in male semi-professional players performing the programme during one full season[2]. Consequently, dissemination and widespread implementation of the ASP in football training seems beneficial[2, 4]. The ASP is based on a single-exercise, the Copenhagen Adduction (CA) exercise[4], structured with three progression levels and a protocol with a pre-season and in-season exercise prescription. In the clinical trial, players completed on average about 70% of the recommended exercise prescription, demonstrating a considerably higher compliance than previous groin injury prevention programmes[5, 6]. The high compliance is an important strength of the ASP, as only injury prevention programmes that are successfully implemented (i.e. widely adopted, complied with and maintained over time) will reach effectiveness outside controlled clinical trials[7].

Gaining knowledge on attitudes, beliefs, and behaviour to injury prevention exercises are important when evaluating their implementation in the real-world setting[7]. For this purpose, integrating the Reach Effectiveness Adoption Implementation Maintenance (RE-AIM) framework[8, 9] is recommended, ideally evaluated across all levels of the sport setting hierarchy[9]. In brief, the framework evaluates the proportion of a targeted population that is aware of a given intervention (Reach), the interventions positive outcomes (Effectiveness), the proportions that has adopted the intervention (Adoption) and implemented it as intended (Implementation), and the extent to which it is sustained (Maintenance)[8, 9]. Note that the specific RE-AIM implementation dimension refers to the extent to which an exercise or a programme is used as intended in the real-world setting[9]. The general term implementation also used in this article, however, refers to all initiatives applied to put an exercise or a programme into practice[10].

1  
2  
3 Attitudes and beliefs towards the ASP is previously investigated among players participating  
4 in the clinical ASP trial[11]. The study revealed that only 31% of the players anticipated to  
5 continue using the ASP in accordance with the original protocol[11]. Also, a recent study on  
6 the CA among coaches in international male professional teams reported that 72% were aware  
7 of the exercise, while 94% of those had adopted it[12]. These findings are consistent with  
8 previous research emphasising that evidence-based injury prevention exercises can be  
9 challenging to apply in the real-world settings[13]. To enhance knowledge, we believed it was  
10 important to conduct a survey among team staff, specifically among those having the main  
11 responsibility for implementing and conducting injury prevention exercises (hereafter referred  
12 to as “delivery agents”).  
13  
14  
15  
16  
17  
18  
19  
20  
21

22 Therefore, the primary aim of this study was to use the RE-AIM framework to investigate  
23 attitudes, beliefs, and behaviour to the ASP among delivery agents of injury prevention  
24 exercises in Norwegian male professional football teams. The secondary aim was to identify a  
25 real-world application of the ASP protocol used in a professional team setting, which to our  
26 knowledge, previously has not been conducted for any single-exercise injury prevention  
27 programme.  
28  
29  
30  
31  
32  
33  
34  
35

## 36 METHODS

### 37 Study design and participants

38  
39 This was a cross-sectional study conducted in September and October 2020. Participants were  
40 the primary delivery agent in each team in the top two divisions of Norwegian male  
41 professional football (n=32): Eliteserien (n=16) and OBOS-ligaen (n=16). The study is  
42 described according to the STROBE statement checklist for cross-sectional studies[14].  
43  
44  
45  
46  
47  
48  
49  
50

### 51 Survey

52  
53 A new questionnaire designed to cover all dimensions of the RE-AIM[8] framework was  
54 developed, based on previous questionnaires used in studies investigating implementation of  
55 preventative training in elite and sub-elite sport’s settings[11, 15]. The final version consisted  
56 of 38 questions, primarily closed-ended. The questionnaire was developed and delivered in  
57  
58  
59  
60

1  
2  
3 Norwegian, however, a translated English version is provided as an appendix to this paper  
4  
5 (Supplementary file 1).  
6  
7  
8

## 9 **Data collection**

10  
11 We collected contact information to the delivery agents either through our network of  
12 contacts or by contacting the team's directly. All delivery agents received an email with  
13 detailed information about the study and a link with access to an online survey software  
14 (SurveyXact, Rambøll Management Consulting AS, Oslo). We distributed the questionnaire  
15 during an international break in September 2020. Weekly reminders were sent to non-  
16 responders by email for four weeks, and after five weeks, non-responders were contacted by  
17 telephone.  
18  
19  
20  
21  
22  
23  
24  
25

## 26 **Analysis**

27  
28 We performed statistical analysis using SPSS statistical software (SPSS V24, IBM  
29 Corporation, Armonk, NY). Data consisted of categorical nominal variables, presented as  
30 proportions, including for the specific RE-AIM dimensions. Open-ended text responses were  
31 analysed with a quantitative content analysis[16], using a structured code form counting  
32 frequencies of variables mentioned. The code form was also used to categorise whether the  
33 participants had a positive, negative, or neutral attitude.  
34  
35  
36  
37  
38  
39  
40

## 41 **Patient and public involvement**

42  
43 Three experienced delivery agents (two physiotherapists and one football coach) not involved  
44 as participants did pilot test the questionnaire and gave feedback on its understanding and  
45 readability. Patients and/or the public were not involved in any other part of the conduct, or  
46 reporting, or dissemination plans of this research.  
47  
48  
49  
50  
51  
52  
53  
54  
55  
56  
57  
58  
59  
60

## RESULTS

### Participant characteristic

Twenty-nine (91%) of the 32 delivery agents participated in the survey (14 from Eliteserien and 15 from OBOS-ligaen). The non-responders gave no specific reasons for not participating. Twenty-three (79%) of the respondents were physiotherapists, five (17%) were strength and conditioning coaches and one (3%) was a naprapath. Respondents' experience as delivery agents in football is shown in Table 1.

**Table 1:** Years of experience as delivery agents of injury prevention exercises in football

| Years of experience as delivery agent | n (%)   |
|---------------------------------------|---------|
| 0-4 years                             | 5 (17)  |
| 5-9 years                             | 13 (45) |
| 10-14 years                           | 7 (24)  |
| 15-19 years                           | 3 (10)  |
| ≥ 20 years                            | 1 (3)   |

### Attitudes to groin injury risk and importance of injury mitigation

Football players risk of getting a groin problem was assumed to be high or moderate by 19 (66%) and 9 (31%) delivery agents, respectively, while one respondent considered the risk to be low. All (100%) respondents thought prevention exercises to mitigate groin problems was important, replied by 27 (93%) as highly important and by 2 (7%) as moderately important.

### Reach and effectiveness of the ASP

All (100%) respondents were aware of either one or both of ASP and the CA. All (100%) delivery agents thought the ASP has potential to successfully mitigate the burden of groin problems, with 11 (38%) perceiving the groin problem mitigation as large and 18 (62%) perceiving it as moderate. Beliefs about the ASP's effect on player availability can be viewed in Figure 1.

[INSERT FIGURE 1 WITH LEGEND HERE]

## Adoption and implementation of the ASP

All (100%) delivery agents had adopted the ASP in their team the current season, of which three (10%) replied that their usage was in accordance with the original ASP protocol. How the teams reported the usage of the ASP in terms of exercise frequency, sets and repetitions, is shown in Table 2 and 3 for pre-season and in-season, respectively.

**Table 2: Overview of reported training volume of the Adductor Strengthening Programme (ASP) during pre-season\***

| <b>“How often were the players instructed to perform the ASP?”</b>            | <b>n (%)</b> |
|-------------------------------------------------------------------------------|--------------|
| More than 3 times a week                                                      | 2 (7)        |
| 3 times a week                                                                | 4 (14)       |
| Twice a week                                                                  | 16 (55)      |
| Once a week                                                                   | 5 (17)       |
| We carried out the program, but less than once a week                         | 2 (7)        |
| <b>“How many sets were the players instructed to perform per side?”</b>       | <b>n (%)</b> |
| More than 2 sets per side                                                     | 8 (28)       |
| 2 sets per side                                                               | 17 (59)      |
| 1 set per side                                                                | 4 (14)       |
| <b>“How many repetitions were the players instructed to perform per set?”</b> | <b>n (%)</b> |
| More than 15 repetitions each week                                            | 1 (3)        |
| 12-15 repetitions each week                                                   | 3 (10)       |
| 7-10 repetitions each week                                                    | 16 (55)      |
| 3-5 repetitions each week                                                     | 1 (3)        |
| 3-15 repetitions, weekly progressive as in protocol                           | 3 (10)       |
| 3-15 repetitions, weekly progressive as own modification                      | 5 (17)       |

\*Specified as under normal circumstances, e.g., not influenced by Covid-19

**Table 3: Overview of reported training volume of the Adductor Strengthening Programme (ASP) during in-season\***

| <b>“How often were the players instructed to perform the ASP?”</b>      | <b>n (%)</b> |
|-------------------------------------------------------------------------|--------------|
| More than once a week                                                   | 9 (31)       |
| Once a week                                                             | 16 (55)      |
| Once every two weeks                                                    | 2 (7)        |
| We carried out the program, but less than once every two weeks          | 2 (7)        |
| <b>“How many sets were the players instructed to perform per side?”</b> | <b>n (%)</b> |



|                                                                               |              |
|-------------------------------------------------------------------------------|--------------|
| More than 2 sets per side                                                     | 7 (24)       |
| 2 sets per side                                                               | 18 (62)      |
| 1 set per side                                                                | 4 (14)       |
| <b>“How many repetitions were the players instructed to perform per set?”</b> | <b>n (%)</b> |
| More than 15 repetitions                                                      | 1 (3)        |
| 12-15 repetitions                                                             | 6 (21)       |
| 8-11 repetitions                                                              | 14 (48)      |
| 4-7 repetitions                                                               | 8 (28)       |

\*Specified as under normal circumstances, e.g., not influenced by Covid-19

The most often-used ASP modifications are summed up in Table 4, which is the identified real-world application of the ASP protocol used in a professional team setting.

**Table 4:** Adductor Strengthening Programme real-world application in Norwegian male professional football teams

| <b>Adductor Strengthening Programme – real-world application</b> |                   |               |                      |
|------------------------------------------------------------------|-------------------|---------------|----------------------|
| Week                                                             | Sessions per week | Sets per side | Repetitions per side |
| Pre-season – week 1-8                                            | 2                 | 2             | 7-10                 |
| In-season – all weeks                                            | 1                 | 2             | 8-11                 |

### Maintenance of the ASP

Twenty-eight (97%) delivery agents planned to continue using the ASP in the subsequent season, of which 20 (71%) planned to use a modified protocol.

### Facilitators and barriers to implementation of the ASP

The most often stated reasons to use the ASP were first, the documented preventive effect of the ASP (100%, both in current and subsequent season) and second, that no additional equipment is needed (52% in current and 43% in subsequent season) (Figure 2). On an open-ended non-mandatory question, four respondents (27%) defined an indirect performance enhancing effect as an additional positive effect of ASP. Five (31%) respondents described the ASP progression levels as being too demanding, while four (25%) thought it was likely to cause muscle soreness. Two of these four respondents indicated soreness was the reason for modifying the original ASP protocol.

1  
2  
3 **[INSERT FIGURE 2 WITH LEGEND HERE]**  
4  
5  
6  
7

## 8 **DISCUSSION**

9

10  
11 The primary aim of the present study was to use the RE-AIM framework to investigate  
12 attitudes, beliefs, and behaviour regarding the ASP among delivery agents of injury  
13 prevention exercises in Norwegian male professional football teams. A secondary aim was to  
14 identify a real-world application of the ASP used in a professional team setting. The main  
15 findings were that all delivery agents were aware of the ASP, all thought the programme can  
16 mitigate the burden of groin problems, all stated to use the ASP in their team the current  
17 season and, almost everyone planned to continue using it in the subsequent season. However,  
18 only 10% used the ASP in accordance with the original ASP protocol.  
19  
20  
21  
22  
23  
24

### 25 **Reach and effectiveness**

26

27  
28 Having a targeted population to recognize injury risk, to be aware of relevant injury  
29 prevention exercises or programs, and to acknowledge the exercise's or program's ability to  
30 mitigate the injury risk, are vital for successful real-world implementation of effective injury  
31 prevention exercise programs[9, 17-20]. The surveyed delivery agents' belief that players are  
32 at moderate to great risk of groin problems aligns well with epidemiological data[1, 3, 21].  
33 The reported awareness level of ASP on the other hand is higher than previously reported for  
34 the CA[12] and the injury prevention exercise programme, FIFA 11+[22]. Discrepancies in  
35 awareness levels between members of the team around the players may be due to, unlike the  
36 current study surveying mostly physiotherapists, comparable studies having primarily  
37 surveyed head coaches which clearly also have other responsibilities besides being updated on  
38 injury prevention exercises and measures.  
39  
40  
41  
42  
43  
44  
45  
46  
47

48 All delivery agents considering the ASP as capable of mitigating the burden of groin  
49 problems aligns with its evidence-based effect, and coincides with previously reported  
50 perceptions of the CA[12]. Moreover, the high ASP awareness level and the positive attitude  
51 towards its efficacy implies that the ASP dissemination strategies have been successful within  
52 this specific population of clinicians.  
53  
54  
55  
56  
57  
58  
59  
60

## Adoption

All respondents reported using the ASP throughout the season. This is a similar finding to the adoption rate seen for the CA[12] in male professional football, when only accounting for users being aware of the exercise. Compared to what has been reported for the Nordic Hamstring (NH) exercise[23] in male professional football however, the ASP adoption rate is substantially higher. Interestingly, all respondents stated that the evidence-based efficacy of the ASP was an important reason for choosing to adopt the programme. The discrepancy in ASP and NH adoption rates are interesting, as they share the same exercise characteristics, and both were originally studied in clinical trials including Norwegian male football teams[2, 23]. One variation, however, that may explain some of the discrepancy in adoption rates is the six-year's difference between our data collection and the data collection of the NH adoption[24]. This is likely due to evidence-based efforts to prevent injuries having improved among practitioners in elite teams in recent years[25].

## Implementation

When implementing the programme, the current study shows that delivery agents in professional football usually modify the ASP to fit their team's training philosophy and schedule. Similar findings have been demonstrated for the NH[24, 26] and the FIFA 11+[27, 28]. So far, no other studies on specific modifications of single-exercise injury prevention programmes exist.

The original ASP protocol[2] prescribes a pre-season strengthening phase containing a detailed eight-week progression, and an in-season maintenance phase with a continuous number of repetitions. The intention is first, to provide hip adductor muscle strength gains, and second, to maintain the increased muscle strength, as reduced hip adductor muscle strength is the only consistently reported risk factor for groin injury in sports[29].

Compared to the original programme, in total, the delivery agents usually prescribed slightly more repetitions per session, but divided into two sets, especially during in-season. Furthermore, they generally conducted fewer sessions per week during pre-season, and the vast majority did not adopt the eight-week progression recommended for pre-season.

We did not investigate why the delivery agents modified the ASP. However, a potential reason for non-progression during pre-season strengthening phase might be that the delivery

agents consider most professional players to already have gained, and maintained, adequate hip adductor muscle strength. This would limit the delivery agent's perceived need for players to commence a progressive strengthening phase. Another reason for the modifications of the ASP could also be lack of support and acceptance from players and/or coaches. Such support is considered a key facilitator in the implementation process[9, 22] and, motivation to comply with the original ASP protocol has already been shown to be low among players[11]. A reason for modifying previous injury prevention strengthening exercises has been attributed to a possible fear of muscle soreness[13, 30]. However, only two respondents reported to have modified the ASP partly due to such fear, and there is evidence that even the most strenuous level of the ASP barely caused any reported muscle soreness if the number of repetitions was progressed gradually[31, 32]. Consequently, fear of muscle soreness seems to not be an important barrier to optimal ASP implementation in the real-world setting.

### **Effectiveness of the real-world application of the ASP**

An important aspect is that the delivery agents modify the ASP without knowing the impact. As mentioned, the ASP aims to mitigate groin problems by targeting hip adductor muscle strength. There is compelling evidence that muscle strength effects are dose dependent[33], which also has been suggested for the CA[34]. The reported used pre-season ASP exercise volume is approximately 640 repetitions during eight weeks, which, interestingly, is a higher volume than what the evidence-based original ASP protocol prescribes (470 repetitions)[2]. Moreover, it accommodates a suggested minimum of 500-800 repetitions during eight weeks, when aiming to facilitate meaningful hip adductor muscle strength gains[34]. Since the reported used weekly in-season ASP exercise volume is almost equal to pre-season, it is reasonable to assume that players somewhat maintain their hip adductor muscle strength during in-season.

Beyond volume considerations, progression seems required to elicit the greatest strength training gains[35]. As the ASP consists of a bodyweight exercise, weekly increase in the number of repetitions is the main progression variable. A critical assessment is therefore whether the reported lack of pre-season progression can reduce the ASP's effectiveness in groin problem mitigation. Additionally, muscle strength gains also depends on recruitment of high-threshold motor units, through accumulation of neuromuscular fatigue induced when performing sets to at least somewhat near neuromuscular failure[36]. Therefore, another

1  
2  
3 critical assessment would be whether more sets but fewer repetitions per set, as respondents  
4 have reported, affect the ASP's effectiveness.  
5  
6  
7

8 So far, changes in physiological characteristics when performing the ASP, such as effects on  
9 muscle cross-sectional area and architecture, musculotendinous stiffness, and motor unit  
10 recruitment and synchronization[35], have not been scientifically investigated. Similarly, the  
11 exact dose-response relationship between ASP exercise volume and hip adductor muscle  
12 strength gains, and between ASP exercise volume and groin injury mitigation rates also  
13 remains to be investigated. And lastly, the importance of a progression strengthening phase(s)  
14 when aiming to mitigate groin problems, is unknown. Discussions around the most often-used  
15 modification's impact on the ASP's effectiveness are therefore currently theoretical, only.  
16  
17  
18  
19  
20  
21  
22

23  
24 Consequently, we will argue that there is no convincing evidence claiming that the ASP  
25 modifications applied by the delivery agents affect the mitigation of groin problems in male  
26 professional players, compared to the original protocol. Additionally, considerations on ASP  
27 exercise volume and other modifications are subordinated to the fact that no injury prevention  
28 programme will reach its full potential unless it is implemented, adopted, and maintained, by  
29 teams in the real-world setting[19].  
30  
31  
32  
33  
34  
35

## 36 Maintenance

37  
38 To be successful, the final step of any injury prevention exercise implemented in the real-  
39 world setting is that the exercise or the program is maintained over multiple seasons. In our  
40 study, nearly all respondents planned to continue using the ASP in the subsequent season,  
41 representing a considerably higher maintenance level than previously reported[11]. A  
42 particular challenge, however, is that team staff members, including medical staff, are  
43 frequently replaced when managers are replaced, increasing the risk of preventative measures  
44 not being persistently maintained over time[19]. It is yet to be confirmed whether ASP has  
45 been established as part of the teams' or clubs' sports plans or policies on injury prevention  
46 measures.  
47  
48  
49  
50  
51  
52  
53  
54  
55  
56  
57  
58  
59  
60

## Methodological considerations

The high response rate (91%) is a strength of this study. However, it is uncertain whether our results can be generalised to other delivery agents and professional football settings outside Norway. Especially, considering that the original ASP intervention study was conducted among Norwegian male football teams. This may have led to a “word of mouth” effect in the Norwegian football community, which to some extent can explain the higher ASP awareness level and adoption rates in this study.

A further strength of the current study is the pilot testing of the questionnaire ensuring valuable input to the final questionnaire. A limitation is that the internal validity of the questionnaire was not systematically explored, which is a prerequisite to draw firm valid conclusions[37]. The pilot study ensured, however, some degree of internal validity, by providing adequate understanding and readability of the questionnaire dimensions. Furthermore, questions related to the “implementation” dimensions, especially regarding the pre-season application of the ASP, are prone to some degree of recall bias as the survey was conducted towards the end of the competitive season[38]. Therefore, this study describes how the teams in overall perform the ASP, only, while it is likely that the programme was individualised depending on players previous injury record and experience with specific strength exercises. Moreover, this study did not include a question about delivery agents’ perceived involvement in and support from players and coaches, which is considered a key facilitator to successful implementation in the real-world football setting[9].

Importantly, 79% of the respondents had a defined team staff role as a physiotherapist. This contrasts with previous studies, where surveyed delivery agents were either strength and conditioning coaches, head coaches or medical doctors[22, 26, 30, 39, 40]. In contrast to the other members of the medical and coaching staff, physiotherapists are educated and trained in health science with special emphasis on injury prevention and rehabilitation. Therefore, it is not unlikely that some of the variations in attitudes, beliefs and behaviour between the present and previous studies are due to differences in the participant’s formal team staff role and educational background.

Regarding data collection methods, we chose to develop and conduct a survey for the following reasons. Firstly, a survey is an appropriate tool to collect responses from

1  
2  
3 individuals living in a widespread geographical area. Secondly, it is suitable when  
4 investigating several variables at the same time, such as all the RE-AIM dimensions, and  
5 thirdly, a survey provides a cost-effective and relatively seamless data collection method.  
6  
7 Therefore, a survey using a questionnaire was considered appropriate to accommodate the  
8  
9 research questions in our study.  
10  
11  
12  
13

## 14 **PERSPECTIVES**

15  
16 The delivery agents are aware of the ASP, they have adopted it, and they anticipate  
17 maintaining the usage. The implementation of the programme, however, is slightly different  
18 in each team. Further studies are warranted to acquire knowledge about why the ASP is being  
19 modified, and the impact of the modifications on the ASP's effectiveness. As this in previous  
20 studies primarily has been conducted in male adult teams, future studies should include  
21 women's and youth football, too. Also, widespread dissemination of the ASP outside the  
22 Scandinavian countries is needed to achieve reach world-wide. Finally, as  
23 recommended[9], similar investigations of attitudes, beliefs, and behaviour to the ASP among  
24 other stakeholder, e.g. coaches, club officials and relevant sporting organisations, are needed  
25 in order to further explore the complexity of introducing preventative measures in the real-  
26 world professional setting.  
27  
28  
29  
30  
31  
32  
33  
34  
35  
36  
37  
38

## 39 **CONCLUSION**

40  
41 The present study found that delivery agents of injury prevention exercises in Norwegian  
42 male professional football teams have positive attitudes and beliefs to the ASP, using it  
43 frequently and planning to maintain the usage of it in the subsequent season. Most delivery  
44 agents, however, instructed players to complete the ASP with modifications. Therefore, we  
45 have identified a real-world application of the ASP protocol used in a professional team  
46 setting.  
47  
48  
49  
50  
51  
52  
53

## 54 **Authors contributions**

55  
56 JS, TEA, and JH all conceived the idea for, and planned the study. JS conducted the data  
57 collection and the statistical analysis. JS, TEA, and JH have all been involved in the drafting  
58 and the revisions of the manuscript. JS, TEA, and JH have all approved the final draft.  
59  
60

## Funding statement

The Oslo Sports Trauma Research Center has been established at the Norwegian School of Sport Sciences through generous grants from the Royal Norwegian Ministry of Culture, the South-Eastern Norway Regional Health Authority, the International Olympic Committee, the Norwegian Olympic Committee and Confederation of Sport, and Norsk Tipping AS.

## Competing of interests

None declared

## Ethics approval

The study was approved by the ethics board at the Norwegian School of Sport Sciences (134-130820) and by the Norwegian Centre for Research Data (NSD 2020/837286), and all respondents gave informed consent to participate.

## Data sharing statement

All de-identified data is available upon reasonable request. Suitability of data request and access to data will be determined by all authors collectively.

## Acknowledgements

The authors would like to thank Ben Clarsen for review of and helpful comments on the manuscript. The authors would also like to thank all the delivery agents for their participation in the study.



## Figure legends

Figure 1: Beliefs regarding whether Adductor Strengthening Programme can influence availability of players in training and match-play. \*No respondent replied some decrease, large decrease or don't know.

Figure 2: Reasons for choosing to use the Adductor Strengthening Programme this season and reasons for planning using the programme the following season.

## REFERENCES

- [1] M. Waldén, M. Hagglund, and J. Ekstrand, "The epidemiology of groin injury in senior football: a systematic review of prospective studies," (in eng), *Br J Sports Med*, vol. 49, no. 12, pp. 792-7, Jun 2015, doi: 10.1136/bjsports-2015-094705.
- [2] J. Harøy *et al.*, "The Adductor Strengthening Programme prevents groin problems among male football players: a cluster-randomised controlled trial," *British Journal of*

- 1  
2  
3 *Sports Medicine*, vol. 53, no. 3, pp. 150-157, 2019, doi: 10.1136/bjsports-2017-  
4 098937.
- 5 [3] J. Harøy, B. Clarsen, K. Thorborg, P. Hölmich, R. Bahr, and T. E. Andersen, "Groin  
6 Problems in Male Soccer Players Are More Common Than Previously Reported," (in  
7 eng), *Am J Sports Med*, vol. 45, no. 6, pp. 1304-1308, May 2017, doi:  
8 10.1177/0363546516687539.
- 9 [4] A. Serner, M. D. Jakobsen, L. L. Andersen, P. Hölmich, E. Sundstrup, and K.  
10 Thorborg, "EMG evaluation of hip adduction exercises for soccer players:  
11 implications for exercise selection in prevention and treatment of groin injuries,"  
12 *British Journal of Sports Medicine*, vol. 48, no. 14, pp. 1108-1114, 2014, doi:  
13 10.1136/bjsports-2012-091746.
- 14 [5] A. H. Engebretsen, G. Myklebust, I. Holme, L. Engebretsen, and R. Bahr, "Prevention  
15 of injuries among male soccer players: a prospective, randomized intervention study  
16 targeting players with previous injuries or reduced function," (in eng), *Am J Sports  
17 Med*, vol. 36, no. 6, pp. 1052-60, Jun 2008, doi: 10.1177/0363546508314432.
- 18 [6] P. Hölmich, K. Larsen, K. Krogsgaard, and C. Gluud, "Exercise program for  
19 prevention of groin pain in football players: a cluster-randomized trial," *Scandinavian  
20 journal of medicine & science in sports*, vol. 20, no. 6, pp. 814-821, 2010.
- 21 [7] J. O'Brien, A. Donaldson, and C. F. Finch, "It will take more than an existing exercise  
22 programme to prevent injury," (in eng), *Br J Sports Med*, vol. 50, no. 5, pp. 264-5,  
23 Mar 2016, doi: 10.1136/bjsports-2015-094841.
- 24 [8] R. E. Glasgow, T. M. Vogt, and S. M. Boles, "Evaluating the public health impact of  
25 health promotion interventions: the RE-AIM framework," (in eng), *Am J Public  
26 Health*, vol. 89, no. 9, pp. 1322-7, Sep 1999, doi: 10.2105/ajph.89.9.1322.
- 27 [9] C. F. Finch and A. Donaldson, "A sports setting matrix for understanding the  
28 implementation context for community sport," *British Journal of Sports Medicine*, vol.  
29 44, no. 13, pp. 973-978, 2010, doi: 10.1136/bjism.2008.056069.
- 30 [10] D. Fixsen, S. Naom, K. Blase, R. Friedman, and F. Wallace, "Implementation  
31 Research: A Synthesis of the Literature," *The National Implementation Research  
32 Network*, vol. 97, 01/01 2005.
- 33 [11] J. Harøy, E. G. Wiger, R. Bahr, and T. E. Andersen, "Implementation of the Adductor  
34 Strengthening Programme: Players primed for adoption but reluctant to maintain - A  
35 cross-sectional study," (in eng), *Scand J Med Sci Sports*, vol. 29, no. 8, pp. 1092-1100,  
36 Aug 2019, doi: 10.1111/sms.13444.
- 37 [12] W. Al Attar, M. Husain, A. Qasem, N. Masoudi, and H. Ghulam, "The Copenhagen  
38 Adduction Exercise is not Applied by the Majority of Professional and Semi-  
39 Professional Soccer Players and Coaches," *Annals of Applied Sport Science*, p. e983,  
40 06/05 2021, doi: 10.52547/aassjournal.983.
- 41 [13] A. McCall *et al.*, "Exercise-Based Strategies to Prevent Muscle Injury in Male Elite  
42 Footballers: An Expert-Led Delphi Survey of 21 Practitioners Belonging to 18 Teams  
43 from the Big-5 European Leagues," *Sports Medicine*, vol. 50, no. 9, pp. 1667-1681,  
44 2020/09/01 2020, doi: 10.1007/s40279-020-01315-7.
- 45 [14] E. Von Elm, D. G. Altman, M. Egger, S. J. Pocock, P. C. Gøtzsche, and J. P.  
46 Vandembroucke, "The Strengthening the Reporting of Observational Studies in  
47 Epidemiology (STROBE) statement: guidelines for reporting observational studies,"  
48 *Bulletin of the World Health Organization*, vol. 85, pp. 867-872, 2007.
- 49 [15] S. H. Andersson, R. Bahr, B. Clarsen, and G. Myklebust, "Preventing overuse  
50 shoulder injuries among throwing athletes: a cluster-randomised controlled trial in 660  
51 elite handball players," (in eng), *Br J Sports Med*, vol. 51, no. 14, pp. 1073-1080, Jul  
52 2017, doi: 10.1136/bjsports-2016-096226.
- 53  
54  
55  
56  
57  
58  
59  
60

- 1  
2  
3 [16] A. Canhoto, S. Rose, and N. Spinks, *Management Research – Applying the Principles*.  
4 2014.
- 5 [17] C. F. Finch, P. White, D. Twomey, and S. Ullah, "Implementing an exercise-training  
6 programme to prevent lower-limb injuries: considerations for the development of a  
7 randomised controlled trial intervention delivery plan," (in eng), *Br J Sports Med*, vol.  
8 45, no. 10, pp. 791-6, Aug 2011, doi: 10.1136/bjism.2010.081406.
- 9 [18] J. Forman, M. Heisler, L. J. Damschroder, E. Kaselitz, and E. A. Kerr, "Development  
10 and application of the RE-AIM QuEST mixed methods framework for program  
11 evaluation," (in eng), *Prev Med Rep*, vol. 6, pp. 322-328, Jun 2017, doi:  
12 10.1016/j.pmedr.2017.04.002.
- 13 [19] J. O'Brien, M. Häggglund, and M. Bizzini, *Implementing injury prevention. The rocky  
14 road from RCT to real-world injury reduction*. 2018.
- 15 [20] S. A. Richmond *et al.*, "Facilitators and Barriers to the Implementation of iSPRINT: A  
16 Sport Injury Prevention Program in Junior High Schools," (in eng), *Clin J Sport Med*,  
17 vol. 30, no. 3, pp. 231-238, May 2020, doi: 10.1097/jsm.0000000000000579.
- 18 [21] J. Werner, M. Hagglund, J. Ekstrand, and M. Waldén, "Hip and groin time-loss  
19 injuries decreased slightly but injury burden remained constant in men's professional  
20 football: the 15-year prospective UEFA Elite Club Injury Study," (in eng), *Br J Sports  
21 Med*, vol. 53, no. 9, pp. 539-546, May 2019, doi: 10.1136/bjsports-2017-097796.
- 22 [22] J. O'Brien and C. F. Finch, "Injury prevention exercise programmes in professional  
23 youth soccer: understanding the perceptions of programme deliverers," (in eng), *BMJ  
24 Open Sport Exerc Med*, vol. 2, no. 1, p. e000075, 2016, doi: 10.1136/bmjsem-2015-  
25 000075.
- 26 [23] A. Arnason, T. E. Andersen, I. Holme, L. Engebretsen, and R. Bahr, "Prevention of  
27 hamstring strains in elite soccer: an intervention study," (in eng), *Scand J Med Sci  
28 Sports*, vol. 18, no. 1, pp. 40-8, Feb 2008, doi: 10.1111/j.1600-0838.2006.00634.x.
- 29 [24] R. Bahr, K. Thorborg, and J. Ekstrand, "Evidence-based hamstring injury prevention  
30 is not adopted by the majority of Champions League or Norwegian Premier League  
31 football teams: the Nordic Hamstring survey," (in eng), *Br J Sports Med*, vol. 49, no.  
32 22, pp. 1466-71, Nov 2015, doi: 10.1136/bjsports-2015-094826.
- 33 [25] J. O'Brien and C. F. Finch, "The implementation of musculoskeletal injury-prevention  
34 exercise programmes in team ball sports: a systematic review employing the RE-AIM  
35 framework," (in eng), *Sports Med*, vol. 44, no. 9, pp. 1305-18, Sep 2014, doi:  
36 10.1007/s40279-014-0208-4.
- 37 [26] W. S. A. Al Attar, N. Soomro, P. J. Sinclair, E. Pappas, Q. I. Muaidi, and R. H.  
38 Sanders, "Implementation of an evidence-based injury prevention program in  
39 professional and semi-professional soccer," *International Journal of Sports Science &  
40 Coaching*, vol. 13, no. 1, pp. 113-121, 2018, doi: 10.1177/1747954117707482.
- 41 [27] J. O'Brien, W. Young, and C. F. Finch, "The use and modification of injury prevention  
42 exercises by professional youth soccer teams," (in eng), *Scand J Med Sci Sports*, vol.  
43 27, no. 11, pp. 1337-1346, Nov 2017, doi: 10.1111/sms.12756.
- 44 [28] J. Shamlaye, L. Tomšovský, and M. L. Fulcher, "Attitudes, beliefs and factors  
45 influencing football coaches' adherence to the 11+ injury prevention programme,"  
46 *BMJ Open Sport & Exercise Medicine*, vol. 6, no. 1, p. e000830, 2020, doi:  
47 10.1136/bmjsem-2020-000830.
- 48 [29] J. L. Whittaker, C. Small, L. Maffey, and C. A. Emery, "Risk factors for groin injury  
49 in sport: an updated systematic review," (in eng), *Br J Sports Med*, vol. 49, no. 12, pp.  
50 803-9, Jun 2015, doi: 10.1136/bjsports-2014-094287.
- 51 [30] A. McCall, G. Dupont, and J. Ekstrand, "Injury prevention strategies, coach  
52 compliance and player adherence of 33 of the UEFA Elite Club Injury Study teams: a  
53  
54  
55  
56  
57  
58  
59  
60

- 1  
2  
3 survey of teams' head medical officers," *British Journal of Sports Medicine*, vol. 50,  
4 no. 12, pp. 725-730, 2016, doi: 10.1136/bjsports-2015-095259.
- 5 [31] J. Harøy *et al.*, "Including the Copenhagen Adduction Exercise in the FIFA 11+  
6 Provides Missing Eccentric Hip Adduction Strength Effect in Male Soccer Players: A  
7 Randomized Controlled Trial," (in eng), *Am J Sports Med*, vol. 45, no. 13, pp. 3052-  
8 3059, Nov 2017, doi: 10.1177/0363546517720194.
- 9 [32] G. Polglass, A. Burrows, and M. Willett, "Impact of a modified progressive  
10 Copenhagen adduction exercise programme on hip adduction strength and  
11 postexercise muscle soreness in professional footballers," *BMJ Open Sport &  
12 Exercise Medicine*, vol. 5, no. 1, p. e000570, 2019, doi: 10.1136/bmjsem-2019-  
13 000570.
- 14 [33] G. W. Ralston, L. Kilgore, F. B. Wyatt, and J. S. Baker, "The Effect of Weekly Set  
15 Volume on Strength Gain: A Meta-Analysis," (in eng), *Sports Med*, vol. 47, no. 12,  
16 pp. 2585-2601, Dec 2017, doi: 10.1007/s40279-017-0762-7.
- 17 [34] L. Ishøi and K. Thorborg, "Copenhagen adduction exercise can increase eccentric  
18 strength and mitigate the risk of groin problems: but how much is enough!," *British  
19 Journal of Sports Medicine*, pp. bjsports-2020-103564, 2021, doi: 10.1136/bjsports-  
20 2020-103564.
- 21 [35] T. J. Suchomel, S. Nimphius, C. R. Bellon, and M. H. Stone, "The Importance of  
22 Muscular Strength: Training Considerations," *Sports Medicine*, vol. 48, no. 4, pp. 765-  
23 785, 2018/04/01 2018, doi: 10.1007/s40279-018-0862-z.
- 24 [36] L. S. Pescatello, D. Riebe, and P. D. Thompson, *ACSM's guidelines for exercise  
25 testing and prescription*. Lippincott Williams & Wilkins, 2014.
- 26 [37] A. H. Pripp, "Validitet," *Tidsskrift for den Norske Laegeforening*, vol. 138, no. 13,  
27 2018, doi: 10.4045/tidsskr.18.0398
- 28 [38] M. Porta, *A Dictionary of Epidemiology*. Oxford University Press (in English), 2014.
- 29 [39] A. McCall *et al.*, "Risk factors, testing and preventative strategies for non-contact  
30 injuries in professional football: current perceptions and practices of 44 teams from  
31 various premier leagues," (in eng), *Br J Sports Med*, vol. 48, no. 18, pp. 1352-7, Sep  
32 2014, doi: 10.1136/bjsports-2014-093439.
- 33 [40] A. McCall *et al.*, "Injury prevention strategies at the FIFA 2014 World Cup:  
34 perceptions and practices of the physicians from the 32 participating national teams,"  
35 *British Journal of Sports Medicine*, vol. 49, no. 9, pp. 603-608, 2015, doi:  
36 10.1136/bjsports-2015-094747.
- 37  
38  
39  
40  
41  
42  
43  
44  
45  
46  
47  
48  
49  
50  
51  
52  
53  
54  
55  
56  
57  
58  
59  
60



Figure 1: Beliefs regarding whether Adductor Strengthening Programme can influence availability of players in training and match-play. \*No respondent replied some decrease, large decrease or don't know.

382x75mm (130 x 130 DPI)

1  
2  
3  
4  
5  
6  
7  
8  
9  
10  
11  
12  
13  
14  
15  
16  
17  
18  
19  
20  
21  
22  
23  
24  
25  
26  
27  
28  
29  
30  
31  
32  
33  
34  
35  
36  
37  
38  
39  
40  
41  
42  
43  
44  
45  
46  
47  
48  
49  
50  
51  
52  
53  
54  
55  
56  
57  
58  
59  
60

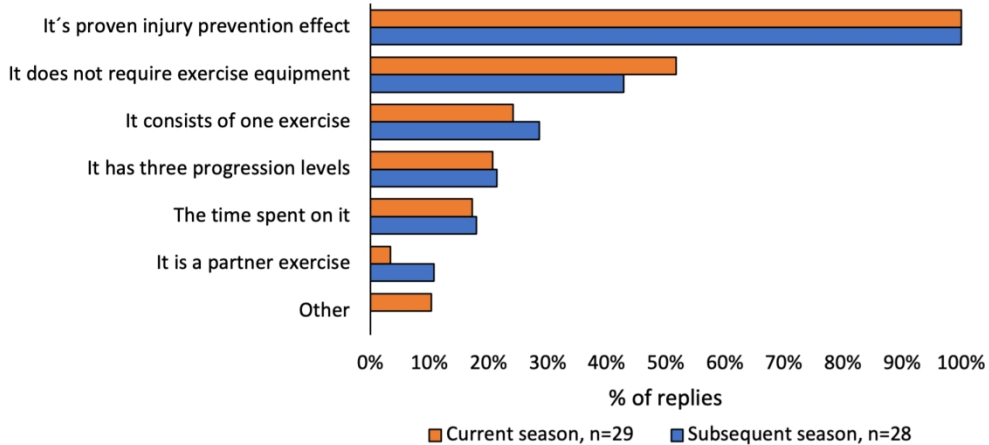

Figure 2: Reasons for choosing to use the Adductor Strengthening Programme this season and reasons for planning using the programme the following season.

372x174mm (130 x 130 DPI)

# Questionnaire

Have you read and approved the informed consent?

Yes

1. What is your age?

18-30 years

31-45 years

46-60 years

More than 60 years

2. At what level does the team where you are employed play?

Eliteserien (Norwegian Premier League)

OBOS-ligaen (Norwegian First Division)

3. What is your role in the team staff where you are employed?

Head coach

Assistant coach

Fitness coach

Physiotherapist

Medical doctor

Other healthcare profession (specify) \_\_\_\_\_

Other position (specify) \_\_\_\_\_

4. What education and / or courses do you have?

It is possible to check several options

UEFA PRO License

UEFA A License

UEFA B License

One-year study in sport science

Bachelor's degree in sport science

Master's degree in sport science

Bachelor's degree in a health profession

Master's degree in a health profession

Other education and/or courses (specify) \_\_\_\_\_

- 1  
2  
3 5. How many years of experience do you have as delivery agent of preventative training  
4 for football players?  
5  
6  0-4 years  
7  5-9 years  
8  10-14 years  
9  15-20 years  
10  More than 20 years  
11  
12  
13

14 **Further, you will get two questions that deal with groin problems.**

15 By groin problems is meant any pain, ache, stiffness, clicking/catching or other complaints  
16 related to the groin, or reduced training participation, training volume or performance due to  
17 groin problems.  
18  
19

- 20  
21 6. How much risk do you think football players have getting groin problems?  
22  Great risk  
23  Moderate risk  
24  Small risk  
25  No risk  
26  Don't know  
27  
28  
29  
30 7. How important do you think it is to perform preventative training to mitigate groin  
31 problems?  
32  Greatly important  
33  Moderately important  
34  A little important  
35  Not important  
36  Don't know  
37  
38  
39  
40  
41 8. Were you aware of the "Adductor Strengthening Programme" and/or the "Copenhagen  
42 Adduction" exercise prior to reading the information in the introduction to this  
43 questionnaire?  
44  Yes  
45  No  
46  Don't know  
47  
48  
49  
50  
51  
52  
53  
54  
55  
56  
57  
58  
59  
60



- 1  
2  
3 9. Where did you get information about the “Adductor Strengthening Programme”  
4 and/or the "Copenhagen Adduction Exercise"?

5  
6 It is possible to check several options

- 7  “Skadefri” website  
8  “Skadefri” application  
9  Article in the British Journal of Sports Medicine  
10  Conference/course  
11  Infographics  
12  Social media (Twitter, Facebook, Instagram etc.)  
13  Other (specify) \_\_\_\_\_  
14  Don’t know

- 15  
16  
17  
18  
19 10. Check if you are aware that you can find information about the “Adductor  
20 Strengthening Programme” and/or the «Copenhagen Adduction Exercise» in these  
21 relevant places:

22  
23 It is possible to check several options

- 24  “Skadefri” website  
25  “Skadefri” application  
26  Article in the British Journal of Sports Medicine  
27  Infographics  
28  Social media (Twitter, Facebook, Instagram etc.)  
29  Other (specify) \_\_\_\_\_

30  
31  
32  
33  
34 **Further, you will get two questions that deal with groin problems.**

35 By groin problems is meant any pain, ache, stiffness, clicking/catching or other complaints  
36 related to the groin, or reduced training participation, training volume or performance due to  
37 groin problems.  
38  
39

- 40  
41 11. Do you think that the “Adductor Strengthening Programme” can influence the burden  
42 of groin problems?

- 43  Yes, the program can greatly mitigate the burden  
44  Yes, the program can moderately mitigate the burden  
45  No, the program cannot have an effect on the burden  
46  Yes, the program can moderately aggravate the burden  
47  Yes, the program can greatly aggravate the burden  
48  Don’t know  
49  
50  
51  
52  
53  
54  
55  
56  
57  
58  
59  
60

1  
2  
3 12. Do you think that the “Adductor Strengthening Programme” can influence football  
4 performance?  
5

- 6  Yes, the program can greatly increase performance  
7  Yes, the program can moderately increase performance  
8  No, the program cannot have an effect on performance  
9  Yes, the program can moderately decrease performance  
10  Yes, the program can greatly decrease performance  
11  Don't know  
12  
13  
14

15 **How do you think the following of the players' physical skills may be affected by doing**  
16 **the “Adductor Strengthening Programme”?**  
17  
18

19 13. Linear acceleration?  
20

- 21  Large increase  
22  Some increase  
23  Unchanged  
24  Some decrease  
25  Large decrease  
26  Don't know  
27  
28  
29

30 14. Top speed?  
31

- 32  Large increase  
33  Some increase  
34  Unchanged  
35  Some decrease  
36  Large decrease  
37  Don't know  
38  
39  
40

41 15. Change of direction?  
42

- 43  Large increase  
44  Some increase  
45  Unchanged  
46  Some decrease  
47  Large decrease  
48  Don't know  
49  
50  
51  
52  
53  
54  
55  
56  
57  
58  
59  
60

1  
2  
3 16. Vertical jump ability?

- 4
- 
- Large increase
- 
- 5
- 
- Some increase
- 
- 6
- 
- Unchanged
- 
- 7
- 
- Some decrease
- 
- 8
- 
- Large decrease
- 
- 9
- 
- Don't know
- 
- 10
- 
- 11
- 
- 12
- 
- 13

## 14 17. Duelling power?

- 15
- 
- Large increase
- 
- 16
- 
- Some increase
- 
- 17
- 
- Unchanged
- 
- 18
- 
- Some decrease
- 
- 19
- 
- Large decrease
- 
- 20
- 
- Don't know
- 
- 21
- 
- 22
- 
- 23
- 
- 24

25 **How do you think other factors can may be affected by doing the “Adductor**  
26 **Strengthening Programme”:**  
27  
28

## 29 18. Availability of players for match?

- 30
- 
- Large increase
- 
- 31
- 
- Some increase
- 
- 32
- 
- Unchanged
- 
- 33
- 
- Some decrease
- 
- 34
- 
- Large decrease
- 
- 35
- 
- Don't know
- 
- 36
- 
- 37
- 
- 38
- 
- 39

## 40 19. Availability of players for training?

- 41
- 
- Large increase
- 
- 42
- 
- Some increase
- 
- 43
- 
- Unchanged
- 
- 44
- 
- Some decrease
- 
- 45
- 
- Large decrease
- 
- 46
- 
- Don't know
- 
- 47
- 
- 48
- 
- 49
- 
- 50

## 51 20. Chance of winning a match?

- 52
- 
- Large increase
- 
- 53
- 
- Some increase
- 
- 54
- 
- Unchanged
- 
- 55
- 
- Some decrease
- 
- 56
- 
- Large decrease
- 
- 57
- 
- Don't know
- 
- 58
- 
- 59
- 
- 60

1  
2  
3 21. What other positive characteristics / achievements / consequences do you think the  
4 “Adductor Strengthening Programme” can provide? Describe in your own words.  
5

6  
7  
8  
9  
10  
11  
12

13  
14 22. What other negative characteristics / achievements / consequences do you think the  
15 “Adductor Strengthening Programme” can provide? Describe in your own words.  
16

17  
18  
19  
20  
21  
22

23  
24 23. Do you use the “Adductor Strengthening Programme” in your team?  
25

- 26  Yes, as described in the protocol  
27  Yes, as modified version  
28  No  
29  Don't know  
30  
31

32  
33 24. How do you use the “Adductor Strengthening Programme” in your training schedule?  
34

- 35  As part of organised football training  
36  As part of organised strength training  
37  As an independent preparation in the locker room or strength room before  
38 training  
39  As guided preparation in the locker room or strength room before training  
40  As independent training in a separate strength training session  
41  Other way (specify) \_\_\_\_\_  
42  
43  
44

45 **When using the “Adductor Strengthening Programme” in season (under normal**  
46 **circumstances, not influenced by covid-19):**  
47

48  
49 25. How often did the players perform the program?  
50

- 51  More than once a week  
52  Once a week  
53  Once every two weeks  
54  We carried out the program, but less than once every two weeks  
55  
56

57 26. How many sets did the players perform?  
58

- 59  More than 2 sets per side  
60  2 sets per side

- 1  
2  
3  1 set per side  
4  
5

6 27. How many repetitions did the players perform in each set?

- 7  More than 15 repetitions per side  
8  12-15 repetitions per side  
9  8-11 repetitions per side  
10  4-7 repetitions per side  
11  Less than 4 repetitions per side  
12  
13  
14

15 **When using the “Adductor Strengthening Programme” in preseason (under normal**  
16 **circumstances, not influenced by covid-19):**  
17

18  
19 28. How often did the players perform the program?

- 20  More than 3 times a week  
21  3 times a week  
22  Twice a week  
23  Once a week  
24  We carried out the program, but less than once a week  
25  
26  
27  
28

29 29. How many sets did the players perform?

- 30  More than 2 sets per side  
31  2 sets per side  
32  1 set per side  
33  
34  
35

36 30. How many repetitions did the players perform in each set?

- 37  More than 15 repetitions per set each week  
38  12-15 repetitions per set each week  
39  7-10 repetitions per set each week  
40  3-5 repetitions per set each week  
41  3-15 repetitions per set, weekly progressive (as in protocol)  
42  3-15 repetitions per set, weekly progressive (as own modification)  
43  
44  
45  
46

47 31. What has been important for you in choosing to use the “Adductor Strengthening  
48 Programme”?

49 It is possible to check several options

- 50  The program's injury prevention effect  
51  The time spent on the program  
52  The programme consists of one exercise  
53  The programme consists of three progression levels  
54  The programme is a partner exercise  
55  The programme does not require exercise equipment  
56  Other (specify) \_\_\_\_\_  
57  
58  
59  
60

1  
2  
3  
4  
5  
6  
7  
8  
9  
10  
11  
12  
13  
14  
15  
16  
17  
18  
19  
20  
21  
22  
23  
24  
25  
26  
27  
28  
29  
30  
31  
32  
33  
34  
35  
36  
37  
38  
39  
40  
41  
42  
43  
44  
45  
46  
47  
48  
49  
50  
51  
52  
53  
54  
55  
56  
57  
58  
59  
60

32. Do you use other preventative training in addition to the “Adductor Strengthening Programme”, with the intention to mitigate the burden of groin problems?

- Yes
- No
- Don't know

33. What training do you use in addition to, or instead of, the “Adductor Strengthening Programme” to mitigate the burden of groin problems? Describe in your own words as detailed as possible which exercise (s), how they are performed, dosage (series, repetitions, intensity), and anything else you consider relevant.

34. Why did you choose to do what is described in the previous answer, and who participated in the decision? Describe in your own words.

35. Do you anticipate using the “Adductor Strengthening Programme” in your team the following season?

- Yes, as described in the protocol
- Yes, as an own modification
- No
- Don't know

36. What is the reason why you anticipate using the “Adductor Strengthening Programme” in your team in the following season?

It is possible to check several options

- The program's injury prevention effect
- The time spent on the program
- The program consists of one exercise
- The program consists of three progression levels
- The program can be performed as a partner exercise
- The program does not require exercise equipment
- Other (specify) \_\_\_\_\_

1  
2  
3 37. What is the reason why you do not anticipate using the “Adductor Strengthening  
4 Programme” in your team in the following season?

5  
6 It is possible to check several options

- 7  The program's lack of injury prevention effect  
8  The time spent on the program  
9  The program consists of only one exercise  
10  The program consists of only three levels of difficulty  
11  The program can be performed as a partner exercise  
12  The program does not require exercise equipment  
13  Other (specify) \_\_\_\_\_  
14  
15  
16  
17

18 38. Do you have any suggestions for changes to the “Adductor Strengthening  
19 Programme” that may make it more relevant to use the program? Describe in your  
20 own words.  
21

22  
23  
24  
25  
26  
27  
28  
29  
30  
31  
32  
33  
34  
35  
36  
37  
38  
39  
40  
41  
42  
43  
44  
45  
46  
47  
48  
49  
50  
51  
52  
53  
54  
55  
56  
57  
58  
59  
60

STROBE Statement—Checklist of items that should be included in reports of *cross-sectional studies*

|                              | Item No | Recommendation                                                                                                                                                                                               | Page No |
|------------------------------|---------|--------------------------------------------------------------------------------------------------------------------------------------------------------------------------------------------------------------|---------|
| <b>Title and abstract</b>    | 1       | (a) Indicate the study's design with a commonly used term in the title or the abstract                                                                                                                       | 2       |
|                              |         | (b) Provide in the abstract an informative and balanced summary of what was done and what was found                                                                                                          | 2       |
| <b>Introduction</b>          |         |                                                                                                                                                                                                              |         |
| Background/rationale         | 2       | Explain the scientific background and rationale for the investigation being reported                                                                                                                         | 4       |
| Objectives                   | 3       | State specific objectives, including any prespecified hypotheses                                                                                                                                             | 5       |
| <b>Methods</b>               |         |                                                                                                                                                                                                              |         |
| Study design                 | 4       | Present key elements of study design early in the paper                                                                                                                                                      | 5       |
| Setting                      | 5       | Describe the setting, locations, and relevant dates, including periods of recruitment, exposure, follow-up, and data collection                                                                              | 5       |
| Participants                 | 6       | (a) Give the eligibility criteria, and the sources and methods of selection of participants                                                                                                                  | 5       |
| Variables                    | 7       | Clearly define all outcomes, exposures, predictors, potential confounders, and effect modifiers. Give diagnostic criteria, if applicable                                                                     | -       |
| Data sources/<br>measurement | 8*      | For each variable of interest, give sources of data and details of methods of assessment (measurement). Describe comparability of assessment methods if there is more than one group                         | -       |
| Bias                         | 9       | Describe any efforts to address potential sources of bias                                                                                                                                                    | -       |
| Study size                   | 10      | Explain how the study size was arrived at                                                                                                                                                                    | 5-6     |
| Quantitative variables       | 11      | Explain how quantitative variables were handled in the analyses. If applicable, describe which groupings were chosen and why                                                                                 | 6       |
| Statistical methods          | 12      | (a) Describe all statistical methods, including those used to control for confounding                                                                                                                        | 6       |
|                              |         | (b) Describe any methods used to examine subgroups and interactions                                                                                                                                          | -       |
|                              |         | (c) Explain how missing data were addressed                                                                                                                                                                  | -       |
|                              |         | (d) If applicable, describe analytical methods taking account of sampling strategy                                                                                                                           | -       |
|                              |         | (e) Describe any sensitivity analyses                                                                                                                                                                        | -       |
| <b>Results</b>               |         |                                                                                                                                                                                                              |         |
| Participants                 | 13*     | (a) Report numbers of individuals at each stage of study—eg numbers potentially eligible, examined for eligibility, confirmed eligible, included in the study, completing follow-up, and analysed            | 5-6     |
|                              |         | (b) Give reasons for non-participation at each stage                                                                                                                                                         | 6       |
|                              |         | (c) Consider use of a flow diagram                                                                                                                                                                           | -       |
| Descriptive data             | 14*     | (a) Give characteristics of study participants (eg demographic, clinical, social) and information on exposures and potential confounders                                                                     | 6       |
|                              |         | (b) Indicate number of participants with missing data for each variable of interest                                                                                                                          | -       |
| Outcome data                 | 15*     | Report numbers of outcome events or summary measures                                                                                                                                                         | 6-8     |
| Main results                 | 16      | (a) Give unadjusted estimates and, if applicable, confounder-adjusted estimates and their precision (eg, 95% confidence interval). Make clear which confounders were adjusted for and why they were included | Ok      |



|                          |    |                                                                                                                                                                            |    |
|--------------------------|----|----------------------------------------------------------------------------------------------------------------------------------------------------------------------------|----|
|                          |    | (b) Report category boundaries when continuous variables were categorized                                                                                                  | -  |
|                          |    | (c) If relevant, consider translating estimates of relative risk into absolute risk for a meaningful time period                                                           | -  |
| Other analyses           | 17 | Report other analyses done—eg analyses of subgroups and interactions, and sensitivity analyses                                                                             | -  |
| <b>Discussion</b>        |    |                                                                                                                                                                            |    |
| Key results              | 18 | Summarise key results with reference to study objectives                                                                                                                   | 8  |
| Limitations              | 19 | Discuss limitations of the study, taking into account sources of potential bias or imprecision. Discuss both direction and magnitude of any potential bias                 | 13 |
| Interpretation           | 20 | Give a cautious overall interpretation of results considering objectives, limitations, multiplicity of analyses, results from similar studies, and other relevant evidence | 13 |
| Generalisability         | 21 | Discuss the generalisability (external validity) of the study results                                                                                                      | 13 |
| <b>Other information</b> |    |                                                                                                                                                                            |    |
| Funding                  | 22 | Give the source of funding and the role of the funders for the present study and, if applicable, for the original study on which the present article is based              | 14 |

\*Give information separately for exposed and unexposed groups.

**Note:** An Explanation and Elaboration article discusses each checklist item and gives methodological background and published examples of transparent reporting. The STROBE checklist is best used in conjunction with this article (freely available on the Web sites of PLoS Medicine at <http://www.plosmedicine.org/>, Annals of Internal Medicine at <http://www.annals.org/>, and Epidemiology at <http://www.epidem.com/>). Information on the STROBE Initiative is available at [www.strobe-statement.org](http://www.strobe-statement.org).
